# Supplementary material for: Curcumin Inhibits ERK/c-Jun Expressions and Phosphorylation against Endometrial Carcinoma
Source: Hindawi journal article supplement (doi:10.1155/2019/8912961), 2019-10-31
Supplement: f1 [file 8912961.f1.pdf]

## **Supplemental Digital Content**

SDC1. Supplementary Table 1 Information of endometrial cancer samples and non-endometrial cancer samples

SDC2. Supplementary Table 2 Information of microarray data

SDC3. Supplementary Table 3 Target gene list of curcumin

SDC4. Supplementary Table 4 Differentially expressed genes between endometrial cancer and non-endometrial cancer samples

Supplementary Table 1 Information of endometrial cancer samples and non-endometrial cancer samples

| Accession | Title       | Source name      | Race                | Characteristics      | Stage | Grade | Histology    |
|-----------|-------------|------------------|---------------------|----------------------|-------|-------|--------------|
| GSM425837 | 2908-lcm    | EE_IC_3_cauc_lcm | caucasian           | age (years): 58      | IC    | 3     | endometrioid |
| GSM425838 | 3210-lcm    | EE_IC_3_cauc_lcm | caucasian           | age (years): 63      | IC    | 3     | endometrioid |
| GSM425839 | 3507-scrape | EE_IC_3_cauc_lcm | caucasian           | age (years): 53      | IC    | 3     | endometrioid |
| GSM425840 | 3492-ls     | EE_IC_3_cauc_lcm | caucasian           | age (years): 63      | IC    | 3     | endometrioid |
| GSM425841 | 3415-scrape | EE_IC_3_cauc_lcm | caucasian           | age (years): 88      | IC    | 3     | endometrioid |
| GSM425842 | 3285-lcm    | EE_IC_3_cauc_lcm | caucasian           | age (years): 49      | IC    | 3     | endometrioid |
| GSM425843 | 3264-lcm    | EE_IB_3_cauc_lcm | caucasian           | age (years): 85      | IB    | 3     | endometrioid |
| GSM425844 | 3433-lcm    | EE_IB_3_cauc_lcm | caucasian           | age (years): 83      | IB    | 3     | endometrioid |
| GSM425845 | 3458-scrape | EE_IB_3_cauc_lcm | caucasian           | age (years): 43      | IB    | 3     | endometrioid |
| GSM425846 | 5008-scrape | EE_IB_3_cauc_lcm | caucasian           | age (years): 60      | IB    | 3     | endometrioid |
| GSM425847 | 5407-lcm    | EE_IB_3_aa_lcm   | african<br>american | age (years): 73      | IB    | 3     | endometrioid |
| GSM425848 | 2944-lcm    | EE_IA_3_cauc_lcm | caucasian           | age (years): 60      | IA    | 3     | endometrioid |
| GSM425849 | 2946-scrape | EE_IA_3_cauc_lcm | caucasian           | age (years): 68      | IA    | 3     | endometrioid |
| GSM425850 | 3025-lcm    | EE_IA_3_cauc_lcm | caucasian           | age (years): 63      | IA    | 3     | endometrioid |
| GSM425851 | G630        | EE_IA_3_cauc_lcm | caucasian           | age (years): unknown | IA    | 3     | endometrioid |

|           |             |                   |                     |                      |    |   |              |
|-----------|-------------|-------------------|---------------------|----------------------|----|---|--------------|
| GSM425852 | G501        | EE_IA_3_cauc_lcm  | caucasian           | age (years): unknown | IA | 3 | endometrioid |
| GSM425853 | 3509-scrape | EE_IC_2_cauc_lcm  | caucasian           | age (years): 57      | IC | 2 | endometrioid |
| GSM425854 | 3068-scrape | EE_IC_2_aa_lcm    | african<br>american | age (years): 65      | IC | 2 | endometrioid |
| GSM425855 | 2933-ls     | EE_IC_2_aa_lcm    | african<br>american | age (years): 72      | IC | 2 | endometrioid |
| GSM425856 | 2795-lcm    | EE_IC_2_cauc_lcm  | caucasian           | age (years): 80      | IC | 2 | endometrioid |
| GSM425857 | 2861-scrape | EE_IC_2_cauc_lcm  | caucasian           | age (years): 47      | IC | 2 | endometrioid |
| GSM425858 | 5021-lcm    | EE_IC_2_cauc_lcm  | caucasian           | age (years): 61      | IC | 2 | endometrioid |
| GSM425859 | 5025-scrape | EE_IC_2_aa_lcm    | african<br>american | age (years): 59      | IC | 2 | endometrioid |
| GSM425860 | 5192-scrape | EE_IC_2_amind_lcm | american<br>indian  | age (years): 60      | IC | 2 | endometrioid |
| GSM425861 | 5320-scrape | EE_IC_2_cauc_lcm  | caucasian           | age (years): 57      | IC | 2 | endometrioid |
| GSM425862 | G007        | EE_IC_2_cauc_lcm  | caucasian           | age (years): unknown | IC | 2 | endometrioid |
| GSM425863 | 3729-lcm    | EE_IB_2_cauc_lcm  | caucasian           | age (years): 66      | IB | 2 | endometrioid |
| GSM425864 | 3783-lcm    | EE_IB_2_cauc_lcm  | caucasian           | age (years): 57      | IB | 2 | endometrioid |
| GSM425865 | 3587-ls     | EE_IB_2_cauc_lcm  | caucasian           | age (years): 48      | IB | 2 | endometrioid |
| GSM425866 | 3583-lcm    | EE_IB_2_cauc_lcm  | caucasian           | age (years): 60      | IB | 2 | endometrioid |
| GSM425867 | 3116-scrape | EE_IB_2_cauc_lcm  | caucasian           | age (years): 55      | IB | 2 | endometrioid |

|           |             |                   |                     |                 |    |   |              |
|-----------|-------------|-------------------|---------------------|-----------------|----|---|--------------|
| GSM425868 | 3080-lcm    | EE_IB_2_cauc_lcm  | caucasian           | age (years): 48 | IB | 2 | endometrioid |
| GSM425869 | 3024-lcm    | EE_IB_2_unkwn_lcm | unknown             | age (years): 64 | IB | 2 | endometrioid |
| GSM425870 | 3461        | EE_IB_2_cauc_lcm  | caucasian           | age (years): 62 | IB | 2 | endometrioid |
| GSM425871 | 3379-scrape | EE_IB_2_aa_lcm    | african<br>american | age (years): 69 | IB | 2 | endometrioid |
| GSM425872 | 3406-lcm    | EE_IB_2_cauc_lcm  | caucasian           | age (years): 75 | IB | 2 | endometrioid |
| GSM425873 | 5258-lcm    | EE_IB_2_cauc_lcm  | caucasian           | age (years): 59 | IB | 2 | endometrioid |
| GSM425874 | 3125-lcm    | EE_IA_2_cauc_lcm  | caucasian           | age (years): 56 | IA | 2 | endometrioid |
| GSM425875 | 3339-lcm    | EE_IA_2_cauc_lcm  | caucasian           | age (years): 64 | IA | 2 | endometrioid |
| GSM425876 | 3769        | EE_IA_2_aa_lcm    | african<br>american | age (years): 47 | IA | 2 | endometrioid |
| GSM425877 | 3269-lcm    | EE_IA_2_aa_lcm    | african<br>american | age (years): 65 | IA | 2 | endometrioid |
| GSM425878 | 3496-lcm    | EE_IA_2_aa_lcm    | african<br>american | age (years): 74 | IA | 2 | endometrioid |
| GSM425879 | 3172-scrape | EE_IA_2_aa_lcm    | african<br>american | age (years): 37 | IA | 2 | endometrioid |
| GSM425880 | 3217-lcm    | EE_IA_2_cauc_lcm  | caucasian           | age (years): 65 | IA | 2 | endometrioid |
| GSM425881 | 3409-lcm    | EE_IA_2_cauc_lcm  | caucasian           | age (years): 49 | IA | 2 | endometrioid |
| GSM425882 | 3986-lcm    | EE_IA_2_cauc_lcm  | caucasian           | age (years): 56 | IA | 2 | endometrioid |
| GSM425883 | 5410-lcm    | EE_IA_2_cauc_lcm  | caucasian           | age (years): 77 | IA | 2 | endometrioid |

|           |             |                  |                     |                      |    |   |              |
|-----------|-------------|------------------|---------------------|----------------------|----|---|--------------|
| GSM425884 | 5178-scrape | EE_IA_2_aa_lcm   | african<br>american | age (years): 79      | IA | 2 | endometrioid |
| GSM425885 | G518        | EE_IA_2_cauc_lcm | caucasian           | age (years): unknown | IA | 2 | endometrioid |
| GSM425886 | 3716-lcm    | EE_IC_1_cauc_lcm | caucasian           | age (years): 67      | IC | 1 | endometrioid |
| GSM425887 | 3638-lcm    | EE_IC_1_cauc_lcm | caucasian           | age (years): 64      | IC | 1 | endometrioid |
| GSM425888 | 5062-scrape | EE_IC_1_cauc_lcm | caucasian           | age (years): 63      | IC | 1 | endometrioid |
| GSM425889 | G039-lcm    | EE_IC_1_cauc_lcm | caucasian           | age (years): unknown | IC | 1 | endometrioid |
| GSM425890 | G643-lcm    | EE_IC_1_cauc_lcm | caucasian           | age (years): unknown | IC | 1 | endometrioid |
| GSM425891 | G016        | EE_IC_1_cauc_lcm | caucasian           | age (years): unknown | IC | 1 | endometrioid |
| GSM425892 | G205        | EE_IC_1_cauc_lcm | caucasian           | age (years): unknown | IC | 1 | endometrioid |
| GSM425893 | 3799-lcm    | EE_IB_1_cauc_lcm | caucasian           | age (years): 60      | IB | 1 | endometrioid |
| GSM425894 | 3789-scrape | EE_IB_1_his_lcm  | hispanic            | age (years): 47      | IB | 1 | endometrioid |
| GSM425895 | 3749-lcm    | EE_IB_1_cauc_lcm | caucasian           | age (years): 52      | IB | 1 | endometrioid |
| GSM425896 | 3557-ls     | EE_IB_1_cauc_lcm | caucasian           | age (years): 54      | IB | 1 | endometrioid |
| GSM425897 | 3514-lcm    | EE_IB_1_cauc_lcm | caucasian           | age (years): 66      | IB | 1 | endometrioid |
| GSM425898 | 3527-lcm    | EE_IB_1_cauc_lcm | caucasian           | age (years): 60      | IB | 1 | endometrioid |
| GSM425899 | 3348-scrape | EE_IB_1_cauc_lcm | caucasian           | age (years): 67      | IB | 1 | endometrioid |
| GSM425900 | 3510-lcm    | EE_IB_1_cauc_lcm | caucasian           | age (years): 55      | IB | 1 | endometrioid |

|           |             |                  |                     |                      |    |   |                  |
|-----------|-------------|------------------|---------------------|----------------------|----|---|------------------|
| GSM425901 | 3748-lcm    | EE_IB_1_cauc_lcm | caucasian           | age (years): 46      | IB | 1 | endometrioid     |
| GSM425902 | 3735-lcm    | EE_IB_1_cauc_lcm | caucasian           | age (years): 62      | IB | 1 | endometrioid     |
| GSM425903 | 3112-lcm    | EE_IB_1_cauc_lcm | caucasian           | age (years): 57      | IB | 1 | endometrioid     |
| GSM425904 | 3094-lcm    | EE_IB_1_cauc_lcm | caucasian           | age (years): 58      | IB | 1 | endometrioid     |
| GSM425905 | 3010-lcm    | EE_IB_1_cauc_lcm | caucasian           | age (years): 58      | IB | 1 | endometrioid     |
| GSM425906 | 3598        | EE_IB_1_cauc_lcm | caucasian           | age (years): 61      | IB | 1 | endometrioid     |
| GSM425907 | 3765-ls     | EE_IA_1_cauc_lcm | caucasian           | age (years): 57      | IA | 1 | endometrioid     |
| GSM425908 | 3386-scrape | EE_IA_1_aa_lcm   | african<br>american | age (years): 71      | IA | 1 | endometrioid     |
| GSM425909 | 3278-scrape | EE_IA_1_cauc_lcm | caucasian           | age (years): 49      | IA | 1 | endometrioid     |
| GSM425910 | 3526-lcm    | EE_IA_1_cauc_lcm | caucasian           | age (years): 51      | IA | 1 | endometrioid     |
| GSM425911 | 2907-lcm    | EE_IA_1_cauc_lcm | caucasian           | age (years): 49      | IA | 1 | endometrioid     |
| GSM425912 | 5046-lcm    | EE_IA_1_aa_lcm   | african<br>american | age (years): 50      | IA | 1 | endometrioid     |
| GSM425913 | 5072-scrape | EE_IA_1_cauc_lcm | caucasian           | age (years): 58      | IA | 1 | endometrioid     |
| GSM425914 | 5113-scrape | EE_IA_1_cauc_lcm | caucasian           | age (years): 58      | IA | 1 | endometrioid     |
| GSM425915 | 5278-lcm    | EE_IA_1_cauc_lcm | caucasian           | age (years): 45      | IA | 1 | endometrioid     |
| GSM425916 | G026-lcm    | PS_IB_3_aa_lcm   | african<br>american | age (years): unknown | IB | 3 | papillary serous |

|           |             |                   |                     |                      |     |     |                      |
|-----------|-------------|-------------------|---------------------|----------------------|-----|-----|----------------------|
| GSM425917 | G029-lcm    | PS_IA_2_aa_lcm    | african<br>american | age (years): unknown | IA  | 2   | papillary serous     |
| GSM425918 | G206-lcm    | PS_IB_3_asian_lcm | asian               | age (years): unknown | IB  | 3   | papillary serous     |
| GSM425919 | G425        | PS_IA_3_cauc_lcm  | caucasian           | age (years): unknown | IA  | 3   | papillary serous     |
| GSM425920 | G519-lcm    | PS_IA_3_aa_lcm    | african<br>american | age (years): unknown | IA  | 3   | papillary serous     |
| GSM425921 | G609-lcm    | PS_IB_3_cauc_lcm  | caucasian           | age (years): unknown | IB  | 3   | papillary serous     |
| GSM425922 | G668-lcm    | PS_IA_2_cauc_lcm  | caucasian           | age (years): unknown | IA  | 2   | papillary serous     |
| GSM425923 | G710-lcm    | PS_IB_2_cauc_lcm  | caucasian           | age (years): unknown | IB  | 2   | papillary serous     |
| GSM425924 | G929-lcm    | PS_I_3_amind_lcm  | american<br>indian  | age (years): unknown | I   | 3   | papillary serous     |
| GSM425925 | 3416-lcm    | PS_IB_3_aa_lcm    | african<br>american | age (years): 51      | IB  | 3   | papillary serous     |
| GSM425926 | 3381-scrape | PS_IB_3_aa_lcm    | african<br>american | age (years): 91      | IB  | 3   | papillary serous     |
| GSM425927 | 3007-ls     | PS_IB_3_aa_lcm    | african<br>american | age (years): 73      | IB  | 3   | papillary serous     |
| GSM425928 | TP02-402    | NL_cauc_lcm       | caucasian           | age (years): 50-55   | n/a | n/a | atrophic endometrium |
| GSM425929 | TP02-478    | NL_cauc_lcm       | caucasian           | age (years): 70-75   | n/a | n/a | inactive endometrium |
| GSM425930 | TP06-612    | NL_aa_lcm         | african<br>america  | age (years): 50-55   | n/a | n/a | inactive endometrium |
| GSM425931 | TP06-708    | NL_cauc_lcm       | caucasian           | age (years): 50-55   | n/a | n/a | inactive endometrium |

|           |              |             |                  |                    |     |     |                                       |
|-----------|--------------|-------------|------------------|--------------------|-----|-----|---------------------------------------|
| GSM425932 | TP06-727-993 | NL_cauc_lcm | caucasian        | age (years): 55-60 | n/a | n/a | inactive endometrium                  |
| GSM425933 | TP06-855     | NL_cauc_lcm | caucasian        | age (years): 60-65 | n/a | n/a | atrophic endometrium                  |
| GSM425934 | TP06-872-lcm | NL_cauc_lcm | caucasian        | age (years): 75-80 | n/a | n/a | weakly proliferative w/cystic changes |
| GSM425935 | TP06-963     | NL_cauc_lcm | caucasian        | age (years): 85-90 | n/a | n/a | cystic atrophy with sessile polyp     |
| GSM425936 | TP06-987     | NL_cauc_lcm | caucasian        | age (years): 50-55 | n/a | n/a | secretory endometrium                 |
| GSM425937 | TP06-998     | NL_cauc_lcm | caucasian        | age (years): 75-80 | n/a | n/a | atrophic endometrium                  |
| GSM425938 | TP07-152     | NL_cauc_lcm | caucasian        | age (years): 50-55 | n/a | n/a | secretory endometrium                 |
| GSM425939 | TP07-726B    | NL_aa_lcm   | african american | age (years): 55-60 | n/a | n/a | inactive endometrium                  |

---

Supplementary Table 2 Information of microarray data

| Item             | Description                                                                                                                                                                                                                                                                                                                                                                                                                           |
|------------------|---------------------------------------------------------------------------------------------------------------------------------------------------------------------------------------------------------------------------------------------------------------------------------------------------------------------------------------------------------------------------------------------------------------------------------------|
| Title            | Gene Expression Analysis of Stage I Endometrial Cancers                                                                                                                                                                                                                                                                                                                                                                               |
| Organism         | Homo sapiens                                                                                                                                                                                                                                                                                                                                                                                                                          |
| Experiment type  | Expression profiling by array                                                                                                                                                                                                                                                                                                                                                                                                         |
| Overall design   | Ninety-one samples of pathologically reviewed stage I endometrial cancers (79 endometrioid and 12 serous) with a heterogeneous distribution of grade and depth of myometrial invasion (i.e. 9 IAG1, 14 IAG2, 7 IAG3, 14 IBG1, 12 IBG2, 13 IBG3, 7 ICG1, 10 ICG2, and 6 ICG3) were examined in relation to 12 samples of atrophic endometrium from postmenopausal women. Specimens were analyzed using oligonucleotide array analysis. |
| Contributor(s)   | Risinger JH, Chandran U, Allard J, Miller C, Sherman M, Zahn C, Oliver J, Banerjee S, Litzi T, Carlson J, Farley J, Rose S, Berchuck A, Kohn E, Day R, Conrads T, Herberman R, Maxwell GL                                                                                                                                                                                                                                             |
| Citation(s)      | Day RS, McDade KK, Chandran UR, Lisovich A et al. Identifier mapping performance for integrating transcriptomics and proteomics experimental results. <i>BMC Bioinformatics</i> 2011 May 27; 12:213. PMID: 21619611                                                                                                                                                                                                                   |
| Submission date  | 9-Jul-09                                                                                                                                                                                                                                                                                                                                                                                                                              |
| Last update date | 9-Aug-18                                                                                                                                                                                                                                                                                                                                                                                                                              |
| Contact name     | Uma Chandran                                                                                                                                                                                                                                                                                                                                                                                                                          |
| E-mail           | chandran@pitt.edu                                                                                                                                                                                                                                                                                                                                                                                                                     |
| Phone            | 412-648-9326                                                                                                                                                                                                                                                                                                                                                                                                                          |

|                   |                                                                     |
|-------------------|---------------------------------------------------------------------|
| Organization name | University of Pittsburgh                                            |
| Department        | BioMedical Informatics                                              |
| Street address    | 5150 Center Ave                                                     |
| City              | Pittsburgh                                                          |
| State/province    | PA                                                                  |
| ZIP/Postal code   | 15232                                                               |
| Country           | USA                                                                 |
| Platforms         | GPL570 [HG-U133_Plus_2] Affymetrix Human Genome U133 Plus 2.0 Array |

---

Supplementary Table 3 target gene list of curcumin

| Gene Symbol | Gene ID | Interaction Count |
|-------------|---------|-------------------|
| TNF         | 7124    | 158               |
| HMOX1       | 3162    | 129               |
| NFE2L2      | 4780    | 77                |
| PTGS2       | 5743    | 77                |
| RELA        | 5970    | 73                |
| BCL2        | 596     | 66                |
| CASP3       | 836     | 66                |
| IL1B        | 3553    | 66                |
| IL6         | 3569    | 53                |
| NOS2        | 4843    | 50                |
| BAX         | 581     | 45                |
| CCND1       | 595     | 42                |
| NQO1        | 1728    | 42                |
| AKT1        | 207     | 41                |
| MMP9        | 4318    | 41                |
| MAPK1       | 5594    | 37                |
| VEGFA       | 7422    | 37                |
| CAT         | 847     | 36                |
| MAPK3       | 5595    | 36                |
| PPARG       | 5468    | 34                |
| TP53        | 7157    | 32                |
| PARP1       | 142     | 31                |
| BCL2L1      | 598     | 30                |
| CDKN1A      | 1026    | 30                |

|         |      |    |
|---------|------|----|
| AR      | 367  | 27 |
| NFKBIA  | 4792 | 27 |
| GCLM    | 2730 | 25 |
| CYP1A1  | 1543 | 24 |
| ICAM1   | 3383 | 24 |
| NFKB1   | 4790 | 24 |
| DDIT3   | 1649 | 23 |
| CXCL8   | 3576 | 22 |
| EGFR    | 1956 | 22 |
| ERBB2   | 2064 | 22 |
| APP     | 351  | 20 |
| CASP9   | 842  | 20 |
| STAT3   | 6774 | 20 |
| KLK3    | 354  | 19 |
| TNFSF10 | 8743 | 19 |
| XIAP    | 331  | 19 |
| BIRC5   | 332  | 18 |
| TGFB1   | 7040 | 18 |
| GCLC    | 2729 | 17 |
| AKR1B1  | 231  | 16 |
| CTNNB1  | 1499 | 16 |
| HIF1A   | 3091 | 16 |
| SOD2    | 6648 | 16 |
| COL1A1  | 1277 | 15 |
| ABCB1   | 5243 | 14 |
| AGT     | 183  | 14 |
| GSTP1   | 2950 | 14 |

|        |      |    |
|--------|------|----|
| MMP2   | 4313 | 14 |
| MPO    | 4353 | 14 |
| PRKCD  | 5580 | 14 |
| AHR    | 196  | 13 |
| CCL2   | 6347 | 13 |
| CDKN1B | 1027 | 13 |
| GSK3B  | 2932 | 13 |
| INS    | 3630 | 13 |
| JUN    | 3725 | 13 |
| CD36   | 948  | 12 |
| EGF    | 1950 | 12 |
| MAPK8  | 5599 | 12 |
| EP300  | 2033 | 11 |
| IFNG   | 3458 | 11 |
| RAD51  | 5888 | 11 |
| ACHE   | 43   | 10 |
| BIRC2  | 329  | 10 |
| BIRC3  | 330  | 10 |
| CASP8  | 841  | 10 |
| EGR1   | 1958 | 10 |
| HDAC1  | 3065 | 10 |
| ERCC1  | 2067 | 9  |
| PECAM1 | 5175 | 9  |
| TLR4   | 7099 | 9  |
| VDR    | 7421 | 9  |
| ARNT   | 405  | 8  |
| CFTR   | 1080 | 8  |

|           |      |   |
|-----------|------|---|
| CTGF      | 1490 | 8 |
| FN1       | 2335 | 8 |
| GSR       | 2936 | 8 |
| IL18      | 3606 | 8 |
| LDLR      | 3949 | 8 |
| MYC       | 4609 | 8 |
| TNFRSF10B | 8795 | 8 |
| WT1       | 7490 | 8 |
| ABCC1     | 4363 | 7 |
| ALB       | 213  | 7 |
| CYP3A4    | 1576 | 7 |

---

Supplementary Table 4 Differentially expressed genes between endometrial cancer and non-endometrial cancer samples

| Gene.symbol        | ID           | adj.P.Val | logFC      | Gene.symbol  | ID          | adj.P.Val | logFC      |
|--------------------|--------------|-----------|------------|--------------|-------------|-----------|------------|
| SRRM4              | 237828_at    | 1.66E-17  | 4.5077497  | EIF4G1       | 208624_s_at | 0.00024   | -1.1092037 |
| TRH                | 206622_at    | 1.28E-14  | 5.0327823  | LOC728743    | 225909_at   | 0.00024   | 1.1928677  |
| IKZF5              | 226680_at    | 2.02E-14  | 1.8201264  | MICAL2       | 236475_at   | 0.000243  | -1.8485981 |
| MIR4738            | 211998_at    | 2.05E-14  | 3.068935   | PCDH18       | 225975_at   | 0.000244  | 1.4525726  |
| ARMCX5-<br>GPRASP2 | 228027_at    | 6.54E-13  | 2.3468483  | OTUD7A       | 232562_at   | 0.000244  | 2.1062752  |
| HK2                | 202934_at    | 6.54E-13  | -3.2045957 | PER3         | 1569701_at  | 0.000245  | 2.1889559  |
| GLUL               | 200648_s_at  | 1.64E-12  | -2.1674298 | XIAP         | 206536_s_at | 0.000246  | -1.2906932 |
| PEG3               | 209242_at    | 1.64E-12  | 4.3857136  | OR51E1       | 229768_at   | 0.000251  | -1.2902219 |
| PDS5B              | 204742_s_at  | 1.69E-12  | 2.2102581  | HTR2B        | 206638_at   | 0.000251  | 2.3313949  |
| SDR39U1            | 213398_s_at  | 3.23E-12  | 1.3191013  | DDX52        | 212834_at   | 0.000252  | -1.0223017 |
| MIR503             | 227488_at    | 3.71E-12  | 4.093846   | RIMS1        | 231986_at   | 0.000253  | 1.4495367  |
| HAND2-AS1          | 236141_at    | 5.59E-12  | 4.3891633  | TIMP3        | 201150_s_at | 0.000255  | 1.8663161  |
| HSPA4              | 208815_x_at  | 6.47E-12  | -1.3512293 | COX7B        | 239252_at   | 0.000256  | 1.2672813  |
| KPNA5              | 229317_at    | 6.48E-12  | 1.5953228  | XPNPEP3      | 220020_at   | 0.000256  | -1.1141576 |
| SMIM11A            | 228239_at    | 7.28E-12  | 1.6259954  | CXCL6        | 206336_at   | 0.000258  | -2.6451556 |
| MAP4K4             | 206571_s_at  | 7.28E-12  | -1.7996607 | ALG13        | 205583_s_at | 0.000259  | 1.3975609  |
| SNHG4              | 228012_at    | 8.7E-12   | 1.2436975  | ITPR2        | 202660_at   | 0.00026   | 1.7939393  |
| BCL2L11            | 1558143_a_at | 9.13E-12  | -2.0297297 | CENPI        | 207590_s_at | 0.00026   | -1.7614041 |
| COA5               | 225409_at    | 9.13E-12  | 1.0830811  | B4GALT5      | 221485_at   | 0.000261  | -1.1312803 |
| KPNA2              | 201088_at    | 9.38E-12  | -1.5056451 | PTCH1        | 209816_at   | 0.000261  | 1.6438512  |
| SOX15              | 206122_at    | 1.11E-11  | 2.9977777  | CD163        | 215049_x_at | 0.000261  | -1.8031279 |
| TACC3              | 218308_at    | 1.54E-11  | -2.7342267 | PCDH17       | 205656_at   | 0.000261  | -1.4828266 |
| PCDH10             | 1556329_a_at | 1.58E-11  | 5.7785827  | LOC101927811 | 230446_at   | 0.000263  | 1.6183988  |

|            |             |          |            |           |              |          |            |
|------------|-------------|----------|------------|-----------|--------------|----------|------------|
| OVCA2      | 222041_at   | 1.7E-11  | 1.7354933  | TIMM23B   | 218118_s_at  | 0.000264 | -1.2155236 |
| IDH2       | 210046_s_at | 2.25E-11 | -2.3900956 | LOC257396 | 236076_at    | 0.000265 | 1.2195377  |
| TOP2A      | 201291_s_at | 2.79E-11 | -3.5263918 | RANGRF    | 223554_s_at  | 0.000265 | 1.2002761  |
| MGC70870   | 242136_x_at | 2.79E-11 | 2.21796    | TSR1      | 218156_s_at  | 0.000267 | -1.0875757 |
| GTSE1      | 204315_s_at | 3.63E-11 | -2.7546691 | SLC13A5   | 228844_at    | 0.000267 | 1.8537757  |
| GFPT1      | 202721_s_at | 3.78E-11 | -2.2372692 | EGFR      | 224999_at    | 0.000269 | 1.3313662  |
| TSC22D1    | 239123_at   | 4.52E-11 | 2.9008823  | IGF1R     | 225330_at    | 0.000269 | 1.3112411  |
| USP30      | 227572_at   | 4.52E-11 | 1.1949762  | ZNF506    | 238493_at    | 0.00027  | 1.9521892  |
| CFL1       | 200021_at   | 4.54E-11 | -1.3961096 | C9orf3    | 212848_s_at  | 0.00027  | 1.3867671  |
| RNFT2      | 221909_at   | 4.55E-11 | -3.3798591 | LINC00865 | 232239_at    | 0.00027  | 2.0079661  |
| N4BP2L2    | 202259_s_at | 4.55E-11 | 1.7495881  | PRRT2     | 227192_at    | 0.000271 | 1.1629471  |
| APH1B      | 226358_at   | 4.55E-11 | 1.7645448  | TYMS      | 1554696_s_at | 0.000272 | -1.5193037 |
| LEPROT     | 209894_at   | 5.15E-11 | 3.1288242  | LRRC70    | 238488_at    | 0.000273 | 1.3320938  |
| HCFC2      | 235264_at   | 6.06E-11 | 1.6211135  | LINC01354 | 239822_at    | 0.000273 | 2.5248452  |
| PROSER1    | 218420_s_at | 6.45E-11 | -1.5425706 | HEMK1     | 218621_at    | 0.000273 | 1.881231   |
| DUSP1      | 201041_s_at | 6.58E-11 | 3.1072446  | ACD       | 204617_s_at  | 0.000274 | 1.042556   |
| KLHDC1     | 1552733_at  | 6.82E-11 | 2.4177182  | TMEM33    | 222642_s_at  | 0.000275 | -1.0708914 |
| CWF19L2    | 228916_at   | 6.82E-11 | 1.26512    | FCGR1CP   | 216950_s_at  | 0.000275 | -1.6332094 |
| ADHFE1     | 227113_at   | 7.66E-11 | 2.7313251  | LEMD2     | 224980_at    | 0.000276 | -1.0776756 |
| ALG10B     | 228941_at   | 7.66E-11 | 1.4983147  | MAP7      | 202889_x_at  | 0.000276 | -1.6501292 |
| ZNF25      | 228185_at   | 8.16E-11 | 1.4578724  | SLC25A27  | 231787_at    | 0.000277 | 2.2415857  |
| GPALPP1    | 229891_x_at | 9.22E-11 | 1.6750874  | TMEM100   | 219230_at    | 0.000277 | 2.2519323  |
| PCM1       | 228905_at   | 9.61E-11 | 2.0896605  | ATL3      | 223452_s_at  | 0.000278 | -1.0807188 |
| FAM63B     | 226873_at   | 9.61E-11 | 1.5864782  | HSPA6     | 117_at       | 0.000278 | -1.3473615 |
| ZNF436-AS1 | 229086_at   | 1.08E-10 | 1.8756075  | ECHDC2    | 235305_s_at  | 0.000279 | 1.2537485  |
| UBXN4      | 212008_at   | 1.22E-10 | -1.3138781 | DENND5B   | 228551_at    | 0.00028  | 1.3006771  |
| ANLN       | 222608_s_at | 1.3E-10  | -3.2642378 | BTRC      | 216091_s_at  | 0.000281 | -1.1235467 |

|         |             |          |            |             |              |          |            |
|---------|-------------|----------|------------|-------------|--------------|----------|------------|
| SPAG9   | 225339_at   | 1.39E-10 | 1.2987209  | TSC22D1-AS1 | 237745_at    | 0.000281 | 1.2854754  |
| G3BP1   | 201514_s_at | 1.58E-10 | -1.4967452 | ABCG1       | 204567_s_at  | 0.000283 | -1.4042646 |
| WBP4    | 203599_s_at | 1.73E-10 | 1.2715974  | AP1M2       | 65517_at     | 0.000283 | -1.0434027 |
| HN1     | 217755_at   | 1.99E-10 | -2.7773985 | ZC3H8       | 239644_at    | 0.000283 | 1.1928199  |
| ZNF302  | 218490_s_at | 1.99E-10 | 2.041215   | SCD         | 211708_s_at  | 0.000284 | -2.1093552 |
| MELK    | 204825_at   | 1.99E-10 | -3.4724608 | PDGFRA      | 203131_at    | 0.000284 | 1.9776074  |
| VSIG2   | 229369_at   | 1.99E-10 | 3.7528414  | TRAPPC2L    | 238628_s_at  | 0.000285 | 1.3692161  |
| NIPBL   | 213918_s_at | 2.09E-10 | -1.5843116 | MMP26       | 220541_at    | 0.000286 | 2.8061749  |
| UGGT1   | 218257_s_at | 2.11E-10 | -1.6862183 | GSPT2       | 205541_s_at  | 0.00029  | 2.6546351  |
| DERL1   | 219402_s_at | 2.17E-10 | -1.5519907 | CDC5L       | 209055_s_at  | 0.000291 | -1.1829462 |
| VCP     | 208649_s_at | 2.27E-10 | -2.0035345 | HGF         | 209960_at    | 0.000291 | 2.1806549  |
| PCDH10  | 228635_at   | 2.61E-10 | 4.6208916  | SLC30A5     | 243166_at    | 0.000292 | 1.1954817  |
| GSTM5   | 205752_s_at | 2.72E-10 | 1.9128569  | STON1       | 213413_at    | 0.000293 | 1.5791858  |
| SCRN2   | 228730_s_at | 3.04E-10 | 1.5964973  | ERAP1       | 214012_at    | 0.000293 | 1.9198651  |
| ARGLU1  | 227448_at   | 3.4E-10  | 1.7082008  | CACNA1D     | 1555993_at   | 0.000294 | 1.3208314  |
| AMT     | 204294_at   | 3.41E-10 | 1.9456881  | COX7A1      | 204570_at    | 0.000294 | 1.8191766  |
| SRSF7   | 201129_at   | 3.56E-10 | 1.2642366  | RUFY2       | 233191_at    | 0.000294 | 1.0945295  |
| CLK4    | 228751_at   | 3.93E-10 | 1.6425037  | ESYT2       | 1558511_s_at | 0.000294 | -1.0059999 |
| FAM110A | 226584_s_at | 3.93E-10 | -1.8626661 | GPC6        | 227059_at    | 0.000294 | 2.7018533  |
| CDC20   | 202870_s_at | 3.94E-10 | -2.4632757 | CERS6       | 235463_s_at  | 0.000294 | -1.0162786 |
| METAP1D | 227805_at   | 4.22E-10 | 2.0314106  | COL27A1     | 225288_at    | 0.000294 | 1.939399   |
| PAK3    | 236277_at   | 4.39E-10 | 3.7706911  | FABP5       | 202345_s_at  | 0.000294 | -1.9136378 |
| ST3GAL5 | 203217_s_at | 4.82E-10 | 2.561826   | AKT3        | 212609_s_at  | 0.000294 | 1.4474471  |
| GPALPP1 | 223606_x_at | 4.82E-10 | 1.2804523  | SSFA2       | 236207_at    | 0.000295 | -2.1802177 |
| TPX2    | 210052_s_at | 4.95E-10 | -2.9917523 | TNFRSF21    | 218856_at    | 0.000297 | -1.2406519 |
| MIGA1   | 235125_x_at | 4.95E-10 | 1.651361   | RAD21       | 200607_s_at  | 0.0003   | -1.0924787 |
| NEK2    | 204641_at   | 5.07E-10 | -2.9828846 | INHBA       | 210511_s_at  | 0.000304 | -2.7858678 |

|              |              |          |            |              |              |          |            |
|--------------|--------------|----------|------------|--------------|--------------|----------|------------|
| CELF5        | 230497_at    | 5.1E-10  | 3.284772   | SFRP5        | 207468_s_at  | 0.000308 | 1.6955584  |
| ARID4A       | 230141_at    | 5.24E-10 | 2.0704842  | CCDC168      | 1561846_s_at | 0.000309 | -2.096374  |
| F11R         | 224097_s_at  | 5.41E-10 | -1.7215027 | KPNA4        | 209653_at    | 0.00031  | -1.5109079 |
| SPSB3        | 46256_at     | 5.52E-10 | 1.448147   | EVC2         | 229974_at    | 0.000311 | 1.7278986  |
| CDCA2        | 226661_at    | 6.67E-10 | -2.6660771 | RBM11        | 232549_at    | 0.000311 | 1.9895172  |
| CDC25A       | 204695_at    | 7.25E-10 | -2.7850119 | ESRP1        | 219121_s_at  | 0.000311 | -1.1077172 |
| GOPC         | 225022_at    | 7.25E-10 | 1.0239025  | VCAN         | 215646_s_at  | 0.000312 | -2.3185812 |
| TSPAN4       | 209263_x_at  | 7.26E-10 | 1.372817   | PPP1R3E      | 227412_at    | 0.000312 | 1.1412936  |
| E2F2         | 228361_at    | 8.13E-10 | -2.2909608 | LINC00665    | 242462_at    | 0.000312 | 1.8189739  |
| SEL1L3       | 212311_at    | 8.64E-10 | -1.9887361 | CHEK1        | 205393_s_at  | 0.000313 | -1.6184854 |
| ITCH         | 217094_s_at  | 8.83E-10 | -1.7670602 | CCDC157      | 1568796_at   | 0.000313 | -1.5360401 |
| CRBN         | 222533_at    | 9.84E-10 | 1.0537644  | LOC101928403 | 236990_at    | 0.000313 | 1.1584961  |
| CPSF2        | 233208_x_at  | 9.84E-10 | -2.1445682 | NR4A2        | 216248_s_at  | 0.000314 | 1.7609499  |
| NTN4         | 223315_at    | 1.01E-09 | 2.4852705  | SDS          | 205695_at    | 0.000314 | -1.5857936 |
| CENPF        | 207828_s_at  | 1.04E-09 | -2.3270785 | PGAP1        | 239725_at    | 0.000315 | 1.688215   |
| TBX3         | 225544_at    | 1.07E-09 | 2.217044   | MCM10        | 222962_s_at  | 0.000315 | -2.2288527 |
| MASP1        | 232224_at    | 1.22E-09 | 2.6864129  | PRPF38A      | 235612_at    | 0.000315 | 1.071095   |
| GAS2L3       | 235709_at    | 1.22E-09 | -3.2153886 | RAB11FIP1    | 219681_s_at  | 0.000318 | -1.5935388 |
| SRSF6        | 208804_s_at  | 1.36E-09 | 1.3868938  | C3orf52      | 219474_at    | 0.000318 | -1.582506  |
| METTTL3      | 209265_s_at  | 1.36E-09 | 1.3661975  | SNX2         | 232049_at    | 0.000319 | 2.3187241  |
| DMRTC1B      | 1553998_at   | 1.37E-09 | 2.3700968  | TTLL7        | 219882_at    | 0.000319 | -2.3018823 |
| MORF4L2-AS1  | 231088_at    | 1.56E-09 | 2.189281   | LOC728705    | 239343_at    | 0.00032  | 1.6972371  |
| MICAL2       | 212473_s_at  | 1.59E-09 | -2.8366934 | SOX4         | 213668_s_at  | 0.000322 | -1.1697028 |
| FOSB         | 202768_at    | 1.61E-09 | 4.8369065  | GCH1         | 204224_s_at  | 0.000323 | -1.1431934 |
| SF3B1        | 229303_at    | 1.67E-09 | 1.1166621  | OTUD1        | 231035_s_at  | 0.000324 | 1.7025988  |
| MCM4         | 212141_at    | 1.67E-09 | -2.943458  | AQP9         | 205568_at    | 0.000325 | -1.7654925 |
| LOC105377832 | 1556148_s_at | 1.67E-09 | 1.701538   | SGO1         | 231938_at    | 0.000326 | -1.7249157 |

|              |              |          |            |              |             |          |            |
|--------------|--------------|----------|------------|--------------|-------------|----------|------------|
| AGBL3        | 232395_x_at  | 1.71E-09 | 1.9617763  | ANKRD22      | 239196_at   | 0.000326 | -1.5979001 |
| SEPSECS      | 227982_at    | 1.71E-09 | 1.2911196  | GPR84        | 223767_at   | 0.000326 | -1.7275897 |
| GADD45B      | 207574_s_at  | 1.73E-09 | 2.449092   | CDCP1        | 234932_s_at | 0.000329 | -1.2315114 |
| WWTR1        | 202134_s_at  | 1.93E-09 | -2.5760653 | NIM1K        | 230864_at   | 0.000329 | 1.7495337  |
| RRM2         | 209773_s_at  | 1.94E-09 | -3.166423  | TTC34        | 1565728_at  | 0.000329 | 1.7804155  |
| ASPM         | 219918_s_at  | 1.94E-09 | -3.7609575 | MUM1         | 221290_s_at | 0.00033  | 1.158286   |
| MARCKS       | 201668_x_at  | 2.05E-09 | -2.6147829 | ETS2         | 241193_at   | 0.000331 | 1.7905865  |
| EPT1         | 1555274_a_at | 2.12E-09 | -1.9894318 | ADAM10       | 202604_x_at | 0.000331 | -1.0229993 |
| CBX7         | 212914_at    | 2.12E-09 | 1.8818875  | BOK          | 223349_s_at | 0.000333 | 1.5738956  |
| MKI67        | 212022_s_at  | 2.32E-09 | -3.3559321 | CSNK2A1      | 212075_s_at | 0.000333 | -1.2783874 |
| CYR61        | 201289_at    | 2.36E-09 | 2.3900296  | TMC5         | 219580_s_at | 0.000334 | -2.3673636 |
| OSR2         | 213568_at    | 2.37E-09 | 3.0085622  | ADAT3        | 230634_x_at | 0.000335 | -1.0573135 |
| KIAA1107     | 214098_at    | 2.46E-09 | 1.3936794  | CUX2         | 213920_at   | 0.000335 | 2.934003   |
| KIF14        | 236641_at    | 2.46E-09 | -2.8418302 | BUB1B        | 203755_at   | 0.000335 | -1.4527118 |
| NR4A1        | 202340_x_at  | 2.46E-09 | 2.577264   | LHX2         | 206140_at   | 0.000335 | -2.7740851 |
| KAT2A        | 202182_at    | 2.46E-09 | 1.8770378  | BZW1         | 200776_s_at | 0.000336 | -1.2003786 |
| SLC52A2      | 218151_x_at  | 2.72E-09 | -1.4491492 | ADH1B        | 209613_s_at | 0.000336 | 2.5901321  |
| LOC101928963 | 235607_at    | 2.8E-09  | 1.6957658  | MIR612       | 225239_at   | 0.000337 | -2.1986899 |
| DUSP2        | 204794_at    | 2.97E-09 | 2.9634703  | DCUN1D1      | 222678_s_at | 0.000339 | -1.8599919 |
| CHD9         | 212615_at    | 3.08E-09 | 1.3547823  | EAF1         | 226952_at   | 0.000339 | -1.0652027 |
| KATNBL1      | 218791_s_at  | 3.19E-09 | 1.1717527  | ACPI         | 215227_x_at | 0.00034  | -1.0366536 |
| AFDN-AS1     | 210409_at    | 3.19E-09 | 2.0448116  | HOOK3        | 224359_s_at | 0.000342 | -1.2937829 |
| TRPC1        | 205802_at    | 3.3E-09  | 2.7402381  | RNASE1       | 201785_at   | 0.000343 | -1.6051202 |
| DLGAP5       | 203764_at    | 3.35E-09 | -3.1976166 | DNAJC12      | 218976_at   | 0.000343 | 1.9120186  |
| SRSF11       | 200685_at    | 3.47E-09 | 1.7090234  | DCN          | 211813_x_at | 0.000345 | 1.7695145  |
| SEC62        | 225352_at    | 3.49E-09 | 1.3721946  | LOC101930112 | 214494_s_at | 0.000345 | 1.0196899  |
| LOXL4        | 227145_at    | 3.57E-09 | 1.947588   | PLA2G6       | 215938_s_at | 0.000346 | 1.2447879  |

|             |              |          |            |              |              |          |            |
|-------------|--------------|----------|------------|--------------|--------------|----------|------------|
| SCAI        | 228174_at    | 3.6E-09  | 1.3789489  | AHSA2        | 230148_at    | 0.000348 | 1.365801   |
| SLC6A2      | 216611_s_at  | 3.7E-09  | 4.9045347  | LINC00323    | 240068_at    | 0.000348 | 2.5961071  |
| R3HDM4      | 55705_at     | 3.71E-09 | -1.1919532 | LOC102725108 | 1559952_x_at | 0.000349 | 1.5589246  |
| HSPA9       | 200692_s_at  | 3.79E-09 | -1.6749073 | TCIRG1       | 204158_s_at  | 0.000349 | 1.4188263  |
| SFXN3       | 1559993_at   | 3.83E-09 | 1.5695441  | PRPF40A      | 233080_s_at  | 0.000351 | -1.0703582 |
| ZNF571      | 206648_at    | 3.83E-09 | 1.3784199  | MICA         | 205905_s_at  | 0.000354 | 1.3341326  |
| MIR3671     | 239130_at    | 4.33E-09 | 3.1335945  | LINC01355    | 244490_at    | 0.000355 | 1.6153853  |
| NFYB        | 244704_at    | 4.45E-09 | 1.5443855  | FZD10-AS1    | 243351_at    | 0.000356 | 1.144997   |
| TBC1D15     | 230072_at    | 4.81E-09 | 1.3914779  | MAGI2-AS3    | 227554_at    | 0.000356 | 1.0150055  |
| SFN         | 33322_i_at   | 4.81E-09 | -2.0279525 | SLC7A11      | 209921_at    | 0.000356 | -1.754543  |
| CEP55       | 218542_at    | 5.51E-09 | -3.3446563 | CCDC18-AS1   | 227074_at    | 0.000356 | 1.3389117  |
| RIOK2       | 222663_at    | 5.58E-09 | 1.5702739  | NUDT7        | 228855_at    | 0.000358 | 1.2366005  |
| DNAJC5      | 224611_s_at  | 5.76E-09 | -1.0285839 | FOXRED2      | 231846_at    | 0.000358 | -1.3148019 |
| UNC13C      | 1556096_s_at | 5.88E-09 | 3.8917864  | CCDC50       | 228693_at    | 0.00036  | 1.0678522  |
| DPY19L4     | 226721_at    | 6.27E-09 | 1.4102238  | CEP68        | 212677_s_at  | 0.000361 | 1.1912405  |
| CPEB1       | 219578_s_at  | 6.53E-09 | 2.8436753  | ZNF214       | 220497_at    | 0.000362 | 1.9395184  |
| ADAMTS9-AS2 | 1556364_at   | 6.54E-09 | 3.3926989  | BBS4         | 212745_s_at  | 0.000362 | 1.36902    |
| TIGAR       | 219099_at    | 6.54E-09 | -1.7494383 | MTMR11       | 1556034_s_at | 0.000362 | 2.0421238  |
| GAS6        | 1598_g_at    | 6.54E-09 | 2.5193856  | OMD          | 205908_s_at  | 0.000362 | 2.0902608  |
| KPNA2       | 211762_s_at  | 6.72E-09 | -2.2987102 | PRICKLE1     | 226069_at    | 0.000362 | 1.7406378  |
| MAP4        | 243_g_at     | 6.78E-09 | -1.111707  | ERG          | 213541_s_at  | 0.000362 | 1.4757464  |
| ADAMTS9-AS2 | 1559296_at   | 7.1E-09  | 3.2894312  | MIR3652      | 200598_s_at  | 0.000364 | -1.2046931 |
| TCEAL7      | 227705_at    | 7.16E-09 | 3.8030119  | LPCAT1       | 201818_at    | 0.000365 | -1.6577188 |
| NADK        | 213607_x_at  | 7.16E-09 | -2.1342038 | RERGL        | 220276_at    | 0.000367 | 2.3121704  |
| RRM2        | 201890_at    | 7.16E-09 | -3.4045592 | EZH2         | 203358_s_at  | 0.000367 | -1.1704238 |
| FOS         | 209189_at    | 7.36E-09 | 3.9406006  | LOC100507311 | 244655_at    | 0.000369 | 2.1680905  |
| YWHAZ       | 200641_s_at  | 7.56E-09 | -1.4347215 | RPS21        | 200834_s_at  | 0.000369 | 1.0015475  |

|           |             |          |            |                     |             |          |            |
|-----------|-------------|----------|------------|---------------------|-------------|----------|------------|
| FLJ37453  | 227593_at   | 7.69E-09 | 1.6555696  | FSTL3               | 203592_s_at | 0.00037  | 1.4160453  |
| NDC80     | 204162_at   | 7.74E-09 | -2.5318281 | PDLIM5              | 216804_s_at | 0.00037  | -1.3424766 |
| HNMT      | 228772_at   | 8.26E-09 | 2.7476868  | CBX5                | 209715_at   | 0.000371 | -1.1972282 |
| C21orf2   | 203996_s_at | 8.28E-09 | 1.989574   | RAB35               | 205461_at   | 0.000371 | -1.9148463 |
| ING5      | 228287_at   | 8.28E-09 | 1.6158536  | FLJ10038            | 236164_at   | 0.000372 | 1.0950731  |
| RNFT2     | 221908_at   | 8.28E-09 | -2.2948028 | DDX17               | 230180_at   | 0.000372 | 1.4757103  |
| RRN3P1    | 216902_s_at | 8.58E-09 | 2.2410045  | GMDS                | 214106_s_at | 0.000375 | -1.3476305 |
| FAM169A   | 235048_at   | 8.63E-09 | 2.5775647  | CCL15-CCL14         | 205392_s_at | 0.000377 | 1.678603   |
| RANBP9    | 216125_s_at | 8.93E-09 | -1.8555829 | ARIH2               | 216008_s_at | 0.000378 | -1.3322571 |
| R3HDM4    | 221764_at   | 8.97E-09 | -1.9212982 | UBQLNL              | 236965_at   | 0.000378 | 2.0031546  |
| DCN       | 209335_at   | 9.35E-09 | 3.2411481  | TWIST2              | 229404_at   | 0.000378 | 1.792534   |
| KIF20A    | 218755_at   | 9.35E-09 | -2.4101672 | CHEK2               | 210416_s_at | 0.000378 | -1.2217635 |
| GPRASP1   | 204793_at   | 1.05E-08 | 1.9421366  | HEY1                | 218839_at   | 0.000378 | -2.4976646 |
| PTTG1     | 203554_x_at | 1.05E-08 | -2.0503935 | SLC31A1             | 203971_at   | 0.000379 | -1.2143919 |
| TUB       | 228882_at   | 1.05E-08 | 2.823809   | LDHA                | 200650_s_at | 0.000379 | -1.1905113 |
| FOXM1     | 202580_x_at | 1.06E-08 | -2.8985831 | PRTG                | 229178_at   | 0.00038  | 2.5112988  |
| TPST1     | 204140_at   | 1.08E-08 | 1.374946   | SPARCL1             | 200795_at   | 0.00038  | 1.6692961  |
| SLC7A6    | 203578_s_at | 1.11E-08 | -1.8105432 | ANKHD1-<br>EIF4EBP3 | 233292_s_at | 0.000381 | -1.5674903 |
| N4BP2L1   | 213375_s_at | 1.13E-08 | 2.0950262  | NR3C1               | 201865_x_at | 0.000381 | 1.2284483  |
| LINC00899 | 232088_x_at | 1.17E-08 | 2.9271468  | ZNF175              | 243128_at   | 0.000383 | 1.5838551  |
| PNP       | 201695_s_at | 1.22E-08 | -1.8822964 | PIGL                | 232262_at   | 0.000385 | 1.4105652  |
| SLC35F6   | 204962_s_at | 1.22E-08 | -2.7298005 | CDK6                | 243000_at   | 0.000388 | 1.4356512  |
| MIR424    | 229784_at   | 1.23E-08 | 2.2501497  | LOC728392           | 218380_at   | 0.000389 | 1.5054817  |
| FAM72A    | 225834_at   | 1.23E-08 | -2.5634442 | IVNS1ABP            | 206245_s_at | 0.000392 | -1.1779342 |
| JUN       | 201466_s_at | 1.25E-08 | 2.124324   | TOP1                | 208900_s_at | 0.000393 | -1.3941444 |
| CYBRD1    | 222453_at   | 1.33E-08 | 2.5518544  | BCL2                | 203685_at   | 0.000395 | 1.8588227  |

|           |              |          |            |            |              |          |            |
|-----------|--------------|----------|------------|------------|--------------|----------|------------|
| ZNF662    | 228538_at    | 1.34E-08 | 3.1660818  | COX20      | 224820_at    | 0.000395 | 1.0550485  |
| ACACA     | 212186_at    | 1.43E-08 | -1.2192059 | LIN7B      | 219760_at    | 0.000396 | 1.1451752  |
| ANKRA2    | 218769_s_at  | 1.45E-08 | 1.1454788  | SLC4A7     | 207604_s_at  | 0.000399 | -1.1297566 |
| HN1       | 222396_at    | 1.48E-08 | -1.4732814 | TCEAL2     | 211276_at    | 0.0004   | 2.7422139  |
| EIF3J-AS1 | 235124_at    | 1.48E-08 | 1.8202525  | FIGN       | 222956_at    | 0.0004   | -1.8509962 |
| TUBE1     | 226181_at    | 1.5E-08  | 1.4446621  | WDR1       | 200611_s_at  | 0.000401 | -1.0353741 |
| UBE2C     | 202954_at    | 1.58E-08 | -1.996391  | TMEM192    | 1555790_a_at | 0.000401 | 1.0734282  |
| KIF15     | 219306_at    | 1.65E-08 | -2.75554   | APOE       | 203382_s_at  | 0.000402 | -1.6604534 |
| PTTG3P    | 208511_at    | 1.85E-08 | -2.2367715 | CENPN      | 222118_at    | 0.000402 | -1.5174804 |
| HSPH1     | 208744_x_at  | 1.92E-08 | -2.3648565 | POLI       | 219317_at    | 0.000402 | 1.087729   |
| CCDC50    | 226713_at    | 2.07E-08 | 1.3767565  | HECW2      | 236089_at    | 0.000404 | -1.99173   |
| BPTF      | 230056_at    | 2.08E-08 | 1.5874423  | SDPR       | 222717_at    | 0.000404 | 2.5569358  |
| SLC38A1   | 224580_at    | 2.08E-08 | -2.5629204 | HIPK1      | 212291_at    | 0.000404 | -1.6769125 |
| PIK3C3    | 229705_at    | 2.12E-08 | 1.4339888  | DNAJC3     | 235341_at    | 0.000407 | -1.2089167 |
| ATG5      | 202512_s_at  | 2.12E-08 | 1.3197353  | THY1       | 213869_x_at  | 0.000411 | -1.302952  |
| ZCCHC7    | 226496_at    | 2.15E-08 | 1.1912651  | SEC61A2    | 219499_at    | 0.000411 | -1.0340588 |
| SMAD4     | 235725_at    | 2.15E-08 | 1.4138557  | SLC7A6     | 203579_s_at  | 0.000414 | -1.2663652 |
| DGKE      | 238694_at    | 2.19E-08 | 1.8294827  | MSN        | 200600_at    | 0.000414 | -1.357398  |
| STAT5B    | 212549_at    | 2.25E-08 | 1.1138509  | RNF157-AS1 | 230776_at    | 0.000419 | 1.6210531  |
| SUGT1P3   | 1554143_a_at | 2.28E-08 | 2.7279325  | NME3       | 204862_s_at  | 0.00042  | 1.2751346  |
| THUMPD1   | 213025_at    | 2.3E-08  | 1.1229325  | CDK7       | 211297_s_at  | 0.00042  | -1.0235082 |
| PNISR     | 212179_at    | 2.36E-08 | 1.4691511  | GLIDR      | 228040_at    | 0.000422 | 1.1520699  |
| VDAC1     | 212038_s_at  | 2.39E-08 | -2.3144359 | RBPM5      | 231961_at    | 0.000422 | 1.7885154  |
| HAND2-AS1 | 219791_s_at  | 2.4E-08  | 4.7904165  | ACE        | 227463_at    | 0.000422 | 1.7701189  |
| MTERF4    | 214364_at    | 2.4E-08  | 1.6986849  | LILRB2     | 210146_x_at  | 0.000423 | -1.8139726 |
| SLC6A2    | 217621_at    | 2.42E-08 | 5.6074171  | ERMP1      | 218342_s_at  | 0.000424 | -1.1449473 |
| C14orf28  | 235369_at    | 2.57E-08 | 1.2965668  | YPEL4      | 235916_at    | 0.000424 | 1.942004   |

|              |              |          |            |              |              |          |            |
|--------------|--------------|----------|------------|--------------|--------------|----------|------------|
| LOC100270804 | 229722_at    | 2.57E-08 | 1.9614121  | HIST1H4H     | 208180_s_at  | 0.000425 | -1.7635145 |
| LINC00893    | 1556026_at   | 2.62E-08 | 2.7331643  | SNRPE        | 231112_at    | 0.000426 | 1.8088627  |
| BAIAP2L1     | 227371_at    | 2.62E-08 | -1.7942652 | LINC00957    | 1564207_at   | 0.000427 | 1.2409874  |
| KLHDC2       | 217906_at    | 2.66E-08 | 1.2049874  | NSUN6        | 230200_at    | 0.000427 | 1.4651108  |
| ACTR3        | 200996_at    | 2.66E-08 | -1.5550792 | CXCL17       | 226960_at    | 0.000429 | -2.0987245 |
| NCAPG        | 218663_at    | 2.68E-08 | -2.9903186 | HAVCR2       | 235458_at    | 0.00043  | -2.023861  |
| PEX3         | 203970_s_at  | 2.74E-08 | 1.3651277  | THEMIS2      | 210785_s_at  | 0.000431 | -1.2199554 |
| IL13RA1      | 211612_s_at  | 2.74E-08 | -1.4862868 | MATN1-AS1    | 1557558_s_at | 0.000435 | 1.3355828  |
| TNXB         | 213451_x_at  | 2.75E-08 | 2.4856819  | COLCA2       | 228338_at    | 0.000436 | 1.3785822  |
| ID4          | 209292_at    | 2.83E-08 | 3.3618979  | LOC102725451 | 1569348_at   | 0.000436 | 1.5987358  |
| LOC100505851 | 1568647_at   | 2.84E-08 | 2.5962007  | WHSC1        | 209052_s_at  | 0.000437 | -1.8749873 |
| LOC100996419 | 1559535_s_at | 3.01E-08 | 1.8636815  | LOC101927137 | 239297_at    | 0.000437 | 2.2004033  |
| HACE1        | 227471_at    | 3.01E-08 | 1.1914586  | ECHDC1       | 219974_x_at  | 0.000438 | -1.0802913 |
| SFN          | 33323_r_at   | 3.04E-08 | -2.5241223 | ZNF506       | 221626_at    | 0.000438 | 1.175738   |
| SURF4        | 222977_at    | 3.07E-08 | -1.0784894 | PKD1L2       | 244444_at    | 0.000438 | 2.6526981  |
| IFI30        | 201422_at    | 3.13E-08 | -2.3283512 | EFR3B        | 227283_at    | 0.000442 | -1.4826227 |
| SKA3         | 227165_at    | 3.15E-08 | -1.6669652 | KIF12        | 229258_at    | 0.000445 | 1.9273482  |
| RBBP6        | 232044_at    | 3.26E-08 | 1.0988385  | HSP90AA1     | 211968_s_at  | 0.000445 | -1.0057964 |
| ANKRD49      | 219069_at    | 3.27E-08 | 1.0953417  | KYAT1        | 206037_at    | 0.000445 | 1.2285929  |
| ADGRD1       | 232267_at    | 3.34E-08 | 3.9024869  | TMX1         | 208097_s_at  | 0.000446 | -1.2428327 |
| ECM2         | 206101_at    | 3.55E-08 | 2.6617568  | PLA2G7       | 206214_at    | 0.000446 | 1.5641414  |
| SLC38A1      | 218237_s_at  | 3.69E-08 | -2.4915589 | NT5E         | 1553994_at   | 0.000447 | 2.0870812  |
| VSIG2        | 228232_s_at  | 3.75E-08 | 2.9465607  | CDKN3        | 1555758_a_at | 0.000448 | -1.9046962 |
| SDC1         | 201287_s_at  | 3.75E-08 | -2.2184597 | PSMG3-AS1    | 1561666_a_at | 0.000448 | 1.6064878  |
| FAM13C       | 1554547_at   | 3.75E-08 | 2.6534262  | SNU13        | 230443_at    | 0.000449 | 1.5331112  |
| ZNF45        | 222028_at    | 3.82E-08 | 1.1575962  | LOC100507520 | 236553_at    | 0.00045  | 1.6366237  |
| CDO1         | 204154_at    | 3.87E-08 | 2.9084191  | CFLAR        | 211317_s_at  | 0.00045  | -1.3114974 |

|          |              |            |            |           |                          |          |            |
|----------|--------------|------------|------------|-----------|--------------------------|----------|------------|
| ZNF302   | 228393_s_at  | 3.87E-08   | 2.0928759  | AK2       | 208967_s_at              | 0.00045  | -1.0987469 |
| SYNCRIP  | 217834_s_at  | 3.9E-08    | -1.4241423 | LINC01122 | 1557472_a_at             | 0.000451 | 2.072767   |
| ZNF706   | 227132_at    | 3.97E-08   | 1.4638711  | CYP4V2    | 228391_at                | 0.000453 | 1.4628103  |
| SEC62    | 1552790_a_at | 3.98E-08   | 1.5220715  | FUT3      | 214088_s_at              | 0.000453 | -1.6424819 |
| AGO2     | 225827_at    | 4.14E-08   | -1.4406469 | NUP88     | 214192_at                | 0.000455 | 2.0215017  |
| TMEM261  | 224860_at    | 4.15E-08   | 1.4948625  | TMED4     | 1558487_a_at             | 0.000456 | 1.0052177  |
| N4BP2L1  | 243843_at    | 4.15E-08   | 1.6733513  | CA11      | 209726_at                | 0.000459 | 1.3933744  |
| SMAD5    | 225223_at    | 4.15E-08   | 1.1505766  | RPS6KA5   | 204633_s_at              | 0.000462 | 1.5292484  |
| SORT1    | 224818_at    | 4.28E-08   | -1.7799441 | ECHDC2    | 218552_at                | 0.000462 | 1.0705268  |
| DBNDD1   | 222234_s_at  | 4.28E-08   | -2.0880292 | HNRNPR    | 208765_s_at              | 0.000463 | -1.2633238 |
| TRPC1    | 205803_s_at  | 4.36E-08   | 2.72232    | PCNT      | 233387_s_at              | 0.000466 | -1.9659452 |
| GLT8D2   | 227070_at    | 4.4E-08    | 2.7584961  | SNCA      | 236081_at                | 0.000466 | 1.8721362  |
| BUB1     | 209642_at    | 4.4E-08    | -2.435243  | RNF213    | 225929_s_at              | 0.000469 | -1.2735653 |
| ATF2     | 212984_at    | 4.45E-08   | 1.108895   | CHDH      | 1559591_s_at             | 0.00047  | 1.0346114  |
| ABRACL   | 223361_at    | 4.47E-08   | -2.0481112 | LOC400622 | 1556435_at               | 0.000472 | 1.9014696  |
| SHPRH    | 226366_at    | 4.55E-08   | 1.3510989  | HCG27     | 1559050_at               | 0.000473 | 1.5711301  |
| MGAT4B   | 220189_s_at  | 4.55E-08   | -1.2178586 | PFDN5     | 207132_x_at              | 0.000476 | 1.1910547  |
|          |              |            |            |           | AFFX-                    |          |            |
| PRICKLE1 | 232811_x_at  | 4.63E-08   | 1.5980615  | GAPDH     | HUMGAPDH/<br>M33197_5_at | 0.000479 | -2.0775094 |
| DDX3X    | 212514_x_at  | 4.86E-08   | -1.3712513 | HEY1      | 44783_s_at               | 0.000479 | -1.9672539 |
| CUL3     | 201372_s_at  | 4.94E-08   | 2.1456792  | PCAT6     | 231233_at                | 0.000481 | -1.2551533 |
| TM9SF3   | 224755_at    | 4.94E-08   | 1.3828358  | ITFG1     | 227191_at                | 0.000482 | 1.0806071  |
| GPSM2    | 205240_at    | 0.00000005 | -2.7658587 | MYO10     | 216222_s_at              | 0.000482 | -1.3133596 |
| SENP6    | 202319_at    | 5.04E-08   | 1.2719041  | ZSCAN12   | 206507_at                | 0.000485 | 1.2751708  |
| TMEM165  | 226825_s_at  | 5.06E-08   | -1.8257138 | CHRD      | 211248_s_at              | 0.000486 | 1.2807376  |
| SORT1    | 212807_s_at  | 5.06E-08   | -1.6568927 | ADAM33    | 233868_x_at              | 0.000489 | 1.2283195  |

|                    |             |          |            |              |             |          |            |
|--------------------|-------------|----------|------------|--------------|-------------|----------|------------|
| ZNF334             | 220022_at   | 5.15E-08 | 3.3840286  | CKAP2        | 218252_at   | 0.000489 | -1.1308952 |
| BIVM               | 222761_at   | 5.16E-08 | 1.1546993  | BBIP1        | 228993_s_at | 0.000489 | 1.102662   |
| FAM169A            | 213954_at   | 5.24E-08 | 2.5912712  | TMEM98       | 223170_at   | 0.000489 | 1.6111958  |
| IDE                | 203328_x_at | 5.36E-08 | -1.04388   | GINS1        | 206102_at   | 0.000489 | -1.3881104 |
| WNK1               | 211994_at   | 5.36E-08 | -1.4079199 | KIAA1683     | 223600_s_at | 0.000489 | 2.2881579  |
| PPM1M              | 226074_at   | 5.6E-08  | 1.6798141  | SLC25A27     | 1554161_at  | 0.000489 | 1.802867   |
| TSTA3              | 36936_at    | 5.76E-08 | -1.1545809 | PLXDC1       | 219700_at   | 0.00049  | 1.2792057  |
| ENO1               | 201231_s_at | 5.95E-08 | -2.2653089 | ANAPC10      | 241959_at   | 0.000491 | 1.1241296  |
| LOC100506718       | 204359_at   | 6.23E-08 | 2.8766428  | CIRBP        | 225191_at   | 0.000492 | 1.3830675  |
| RNASEH1            | 218497_s_at | 6.4E-08  | -1.1969957 | NONO         | 208698_s_at | 0.000495 | -1.0318012 |
| ACAP2              | 212476_at   | 6.42E-08 | 1.2943962  | ABI3BP       | 220518_at   | 0.0005   | 1.9187809  |
| TMEM189-<br>UBE2V1 | 201001_s_at | 6.42E-08 | -1.5004755 | RAPGEF4      | 205651_x_at | 0.000501 | 1.1228196  |
| LY75-CD302         | 203799_at   | 6.51E-08 | 1.9647144  | CD44         | 209835_x_at | 0.000505 | -1.2149522 |
| CENPF              | 209172_s_at | 6.51E-08 | -2.4691285 | GGTA1P       | 228376_at   | 0.000505 | 1.7148972  |
| RORB               | 242385_at   | 6.82E-08 | 3.3374976  | FLJ46875     | 230203_at   | 0.000506 | 1.1008833  |
| VDAC1              | 217140_s_at | 7.14E-08 | -1.7946538 | STK24-AS1    | 232839_at   | 0.000507 | 1.7731761  |
| CTGF               | 209101_at   | 7.19E-08 | 2.5899092  | RGS5         | 218353_at   | 0.000507 | -1.512931  |
| C2orf68            | 65472_at    | 7.33E-08 | 1.2906333  | LOC101929340 | 233527_at   | 0.000508 | 2.027184   |
| EIF4G3             | 201935_s_at | 7.45E-08 | -1.2983835 | UBA6         | 222600_s_at | 0.00051  | -1.088514  |
| PHKB               | 238601_at   | 7.51E-08 | 1.1635578  | FOXP1        | 235444_at   | 0.000512 | 1.1235494  |
| OXR1               | 222553_x_at | 7.51E-08 | 1.4577722  | IGHA2        | 217022_s_at | 0.000512 | -4.7032567 |
| KIF14              | 206364_at   | 7.51E-08 | -2.1117551 | PRKCA        | 213093_at   | 0.000512 | 1.5745583  |
| SLC6A2             | 215715_at   | 7.51E-08 | 5.1959062  | BNC2         | 235723_at   | 0.000513 | 1.9087883  |
| PHTF1              | 210191_s_at | 7.51E-08 | -1.3288121 | FCHSD1       | 226699_at   | 0.000513 | 1.5121924  |
| NMT2               | 215743_at   | 7.56E-08 | 1.9886433  | PARP8        | 244008_at   | 0.000513 | 1.2103979  |
| GLUL               | 217202_s_at | 7.6E-08  | -1.6229203 | WFDC5        | 242204_at   | 0.000513 | -1.7618671 |

|              |              |          |            |            |              |          |            |
|--------------|--------------|----------|------------|------------|--------------|----------|------------|
| ARF3         | 211622_s_at  | 7.69E-08 | -2.6157373 | SLC6A2     | 239394_at    | 0.000514 | 1.6569777  |
| ANGPTL1      | 239183_at    | 7.8E-08  | 4.3133463  | NBL1       | 201621_at    | 0.000514 | 1.8719185  |
| TM2D1        | 213883_s_at  | 7.8E-08  | 1.1048225  | ERCC6L     | 219650_at    | 0.000514 | -1.9268863 |
| C11orf58     | 225811_at    | 7.8E-08  | 1.095085   | ETV5       | 230102_at    | 0.000515 | 2.5785345  |
| NTN5         | 1553890_s_at | 7.85E-08 | 2.5899009  | ADGRF1     | 235988_at    | 0.000515 | -2.6085147 |
| ZC2HC1A      | 241808_at    | 7.87E-08 | 1.5251901  | RAB35      | 225620_at    | 0.000515 | -1.0328163 |
| AGPS         | 205401_at    | 7.89E-08 | -1.387835  | FREM1      | 236031_x_at  | 0.000516 | 1.7022309  |
| MFSD8        | 228282_at    | 8.16E-08 | 1.317      | HOXA11     | 213823_at    | 0.000516 | 1.1172259  |
| SULF1        | 212353_at    | 8.41E-08 | -2.4905636 | DPY19L2P2  | 215143_at    | 0.000519 | 1.625622   |
| ANO4         | 236420_s_at  | 8.43E-08 | 3.1427206  | EWSR1      | 210012_s_at  | 0.000521 | -2.2058922 |
| ARMCX4       | 1552327_at   | 8.67E-08 | 4.1221395  | MPP6       | 205429_s_at  | 0.000522 | -1.812983  |
| ID2B         | 213931_at    | 8.88E-08 | 2.421356   | GAD1       | 206669_at    | 0.000522 | -2.6713601 |
| RAD54L       | 204558_at    | 8.93E-08 | -2.1441536 | KLF15      | 231015_at    | 0.000523 | 1.2497495  |
| HSPB11       | 214163_at    | 8.94E-08 | 1.7404568  | IQCA1      | 238584_at    | 0.000527 | 3.7741439  |
| NCAPG        | 218662_s_at  | 8.94E-08 | -2.497846  | ZSCAN30    | 1557105_a_at | 0.000527 | 1.5169716  |
| SIK1         | 208078_s_at  | 8.94E-08 | 2.2293946  | ABI2       | 209856_x_at  | 0.000527 | -1.44321   |
| ZFPM2        | 219778_at    | 9.2E-08  | 3.8618577  | RADIL      | 223693_s_at  | 0.000529 | 1.3319193  |
| OGN          | 222722_at    | 9.28E-08 | 5.3421623  | LCAT       | 204428_s_at  | 0.000529 | 2.328854   |
| PHLDA2       | 209803_s_at  | 9.75E-08 | -2.9446989 | TRIM74     | 1554182_at   | 0.000529 | 1.6915245  |
| E2F7         | 228033_at    | 9.82E-08 | -2.9243209 | C1GALT1C1L | 241710_at    | 0.00053  | 2.1910833  |
| H2AFY        | 214501_s_at  | 9.83E-08 | -1.0877781 | IRAK1BP1   | 1557174_a_at | 0.000533 | 1.0365461  |
| PDE7A        | 224046_s_at  | 9.83E-08 | -1.7904882 | CFC1B      | 223753_s_at  | 0.000533 | 2.0637897  |
| DTL          | 222680_s_at  | 9.83E-08 | -1.8944308 | CHKB       | 204193_at    | 0.000536 | 1.0375375  |
| ZNF658       | 231950_at    | 9.91E-08 | 1.3343434  | RGS5       | 209070_s_at  | 0.000539 | -1.8129192 |
| LOC101060391 | 241535_at    | 1.02E-07 | 3.9888057  | ANP32E     | 208103_s_at  | 0.000539 | -1.1470964 |
| ZNF582-AS1   | 231260_at    | 1.02E-07 | 3.4579431  | DLX6       | 242940_x_at  | 0.000541 | 2.2007178  |
| CEP68        | 212675_s_at  | 1.03E-07 | 1.6280438  | PDE8A      | 1552931_a_at | 0.000543 | -1.225222  |

|              |              |            |            |              |              |          |            |
|--------------|--------------|------------|------------|--------------|--------------|----------|------------|
| GSK3B        | 209945_s_at  | 1.04E-07   | -1.0265529 | PLAUR        | 214866_at    | 0.000545 | -1.4079972 |
| PDIA3        | 208612_at    | 1.05E-07   | -1.6339159 | PRORSD1P     | 237291_at    | 0.000545 | 1.2123075  |
| DFFA         | 223518_at    | 1.08E-07   | -1.1561609 | F3           | 204363_at    | 0.000545 | 1.940533   |
| SCARNA13     | 244786_at    | 1.09E-07   | 2.0260806  | ZNF337       | 37860_at     | 0.000545 | 1.0109896  |
| PIAS2        | 214442_s_at  | 0.00000011 | -1.3169179 | LOC105377371 | 1559103_s_at | 0.000546 | 1.2291581  |
| ACVR2A       | 228416_at    | 1.11E-07   | 1.4900835  | SPAG1        | 210117_at    | 0.000547 | -1.2490933 |
| SFXN2        | 237334_at    | 1.12E-07   | 1.8101693  | GANAB        | 211934_x_at  | 0.000547 | -1.0735583 |
| GTF2H2B      | 230177_at    | 1.14E-07   | 1.563253   | NUDT16P1     | 1568593_a_at | 0.000548 | 2.1596413  |
| STAT3        | 208992_s_at  | 1.14E-07   | -2.2802235 | ME2          | 210153_s_at  | 0.000549 | -1.674012  |
| LOC101927391 | 244116_at    | 1.16E-07   | 2.3353833  | ZDHHC15      | 1552557_a_at | 0.00055  | 1.9599787  |
| GADD45B      | 209304_x_at  | 0.00000012 | 2.0339867  | DIAPH3       | 232596_at    | 0.000552 | -2.3951854 |
| CECR2        | 239752_at    | 0.00000012 | 4.8000434  | BRCA2        | 208368_s_at  | 0.000552 | -1.4597469 |
| FLRT1        | 210414_at    | 1.23E-07   | 2.1956372  | SCARA3       | 223843_at    | 0.000553 | 2.3880702  |
| YTHDC1       | 240459_at    | 1.23E-07   | 1.2797276  | LXN          | 218729_at    | 0.000555 | 1.2877215  |
| NAALAD2      | 222161_at    | 1.26E-07   | 3.7140078  | RORC         | 228806_at    | 0.000555 | 2.2952048  |
| HSPA4        | 211015_s_at  | 1.26E-07   | -1.5564017 | DPH6         | 238744_at    | 0.000555 | 1.1611017  |
| ZWILCH       | 218349_s_at  | 1.29E-07   | -2.3269635 | LOC100129518 | 215078_at    | 0.000559 | -2.11387   |
| ACTR2        | 200728_at    | 1.31E-07   | -1.5621152 | BNC2         | 229942_at    | 0.000561 | 1.8232944  |
| MIR6741      | 231715_s_at  | 1.32E-07   | -1.5689976 | LDLR         | 202067_s_at  | 0.000563 | -1.8249334 |
| FLT1         | 226497_s_at  | 1.36E-07   | -2.0382103 | TNFAIP3      | 202643_s_at  | 0.000564 | -1.1883584 |
| LOC100507547 | 230054_at    | 1.38E-07   | 1.7815611  | TTC12        | 244571_s_at  | 0.000564 | 1.2638119  |
| EIF5B        | 201027_s_at  | 1.39E-07   | -1.3262655 | TBX2-AS1     | 228978_at    | 0.000564 | 1.9761373  |
| AKT1         | 207163_s_at  | 1.39E-07   | -1.3012129 | CEP152       | 238535_at    | 0.000564 | -1.4834069 |
| HEXIM2       | 243796_at    | 1.41E-07   | 1.5099879  | RPL34        | 200026_at    | 0.000565 | 1.1707983  |
| LOC100505851 | 1568648_a_at | 1.43E-07   | 3.68373    | BICDL1       | 228320_x_at  | 0.000566 | -1.3619635 |
| CCBE1        | 229641_at    | 0.00000015 | 3.4480673  | MTFR1        | 203207_s_at  | 0.000571 | -1.2147412 |
| CALM3        | 209563_x_at  | 1.51E-07   | -1.198842  | THBS1        | 215775_at    | 0.000572 | 1.1091982  |

|             |             |          |            |              |              |          |            |
|-------------|-------------|----------|------------|--------------|--------------|----------|------------|
| GPSM2       | 221922_at   | 1.51E-07 | -1.7218897 | EVC          | 219432_at    | 0.000573 | 2.086216   |
| SMARCA4     | 215714_s_at | 1.54E-07 | -1.6471815 | GSAP         | 222150_s_at  | 0.000574 | 1.4533722  |
| OGN         | 218730_s_at | 1.58E-07 | 4.3407836  | CALB1        | 205625_s_at  | 0.000574 | -2.4243094 |
| P2RY1       | 231925_at   | 1.62E-07 | 2.3331717  | HIST1H4H     | 232035_at    | 0.000578 | -1.6880769 |
| POLI        | 238992_at   | 1.63E-07 | 1.4830246  | WDR19        | 232163_at    | 0.000581 | 1.3299222  |
| ARHGAP20    | 228368_at   | 1.71E-07 | 3.1961628  | ANTXR1       | 220092_s_at  | 0.000581 | -1.7845868 |
| POLR3H      | 225682_s_at | 1.72E-07 | -1.4902994 | LOC101928725 | 1560827_at   | 0.000583 | 1.0440442  |
| TCTE3       | 1557945_at  | 1.72E-07 | 1.1619554  | SUGT1        | 244368_x_at  | 0.000583 | 1.2179915  |
| VDR         | 204255_s_at | 1.75E-07 | -1.8963002 | HMOX1        | 203665_at    | 0.000584 | -1.1340912 |
| LTBP4       | 204442_x_at | 1.76E-07 | 2.9901457  | CXCL11       | 210163_at    | 0.000586 | -2.0578324 |
| E2F3        | 203693_s_at | 1.82E-07 | -1.597371  | WDR92        | 235071_at    | 0.000587 | -1.2667869 |
| TRMT13      | 219130_at   | 1.84E-07 | 1.0615029  | FAT4         | 219427_at    | 0.000592 | 1.2785453  |
| RTCA        | 203594_at   | 1.85E-07 | -1.0057048 | ATP10D       | 213238_at    | 0.000597 | 1.3755748  |
| ATP8B3      | 239457_at   | 1.88E-07 | 3.5592955  | USP7         | 230967_s_at  | 0.000597 | 1.5807974  |
| SSBP2       | 238484_s_at | 1.88E-07 | 1.9924907  | PCDH7        | 210273_at    | 0.000597 | 1.3965843  |
| CHD2        | 228999_at   | 1.93E-07 | 1.3014088  | GSTM1        | 215333_x_at  | 0.000597 | 1.2275744  |
| MIR6883     | 244677_at   | 1.95E-07 | 2.6273639  | THRA         | 204100_at    | 0.000597 | 1.6186184  |
| TMEM147-AS1 | 222280_at   | 1.98E-07 | 1.253375   | ARMCX4       | 227444_at    | 0.0006   | 2.5028271  |
| RAB10       | 222981_s_at | 1.98E-07 | -1.2309187 | PRRX1        | 238852_at    | 0.0006   | 2.1783079  |
| ICE2        | 228960_at   | 2.03E-07 | 1.1797242  | ARSJ         | 219973_at    | 0.0006   | 2.1621606  |
| FUT9        | 214046_at   | 2.04E-07 | 4.1300326  | DUSP10       | 221563_at    | 0.0006   | -1.1668847 |
| NAV1        | 224773_at   | 2.04E-07 | -2.5931966 | FBXL19       | 228277_at    | 0.000601 | -1.5198374 |
| HNRNPA3     | 211929_at   | 2.11E-07 | 1.0837366  | DLG1         | 202516_s_at  | 0.000601 | -1.0150885 |
| ZMAT1       | 226344_at   | 2.11E-07 | 2.8161189  | RPL32P3      | 1558969_a_at | 0.000602 | 1.3437285  |
| WHSC1       | 209053_s_at | 2.11E-07 | -1.4544946 | ZNF146       | 1554433_a_at | 0.000602 | -1.6285649 |
| CD46        | 211574_s_at | 2.14E-07 | -1.9345802 | CALD1        | 205525_at    | 0.000603 | 1.1177884  |
| FAM175A     | 226521_s_at | 2.15E-07 | 1.4172923  | ADH1B        | 209612_s_at  | 0.000604 | 2.4289053  |

|              |              |            |            |              |              |          |            |
|--------------|--------------|------------|------------|--------------|--------------|----------|------------|
| CCNJ         | 229091_s_at  | 2.15E-07   | -1.2518907 | EPB41L4A-AS1 | 225698_at    | 0.000604 | 1.3032     |
| SLC24A3      | 57588_at     | 2.15E-07   | 2.4295735  | MBNL2        | 205018_s_at  | 0.000615 | -2.1054626 |
| RFNG         | 212968_at    | 2.18E-07   | 1.306514   | TAF13        | 205966_at    | 0.000615 | -1.9589459 |
| CCNB2        | 202705_at    | 2.21E-07   | -2.4628019 | GSAP         | 213142_x_at  | 0.000615 | 1.4327745  |
| KLF3-AS1     | 219871_at    | 2.25E-07   | 3.1121334  | DPP6         | 228546_at    | 0.000621 | 2.8846832  |
| FBXL18       | 227500_at    | 2.31E-07   | -1.979891  | GTSE1        | 211040_x_at  | 0.000621 | -1.1352443 |
| EXOSC8       | 215136_s_at  | 2.33E-07   | 1.0620711  | NR3C1        | 211671_s_at  | 0.000625 | 1.3513705  |
| YTHDF2       | 222430_s_at  | 2.53E-07   | -1.0276185 | NIN          | 234299_s_at  | 0.000626 | -1.1660154 |
| EGLN1        | 221497_x_at  | 2.55E-07   | -1.2919701 | LGALS8       | 210732_s_at  | 0.000628 | -1.4108535 |
| ZNF550       | 228099_at    | 2.56E-07   | 1.1158189  | ITIH4        | 37201_at     | 0.000629 | 1.6026321  |
| ESM1         | 208394_x_at  | 2.59E-07   | -2.2977161 | BICD1        | 231964_at    | 0.00063  | 1.2578788  |
| HSPH1        | 206976_s_at  | 2.62E-07   | -1.2301866 | PALMD        | 218736_s_at  | 0.000637 | 1.5902399  |
| FUBP1        | 214093_s_at  | 2.62E-07   | 1.395237   | FOXN3        | 230790_x_at  | 0.000641 | 1.1703325  |
| PAXIP1-AS1   | 235587_at    | 2.62E-07   | 1.2480463  | PDK1         | 206686_at    | 0.000641 | -1.616714  |
| TTC17        | 224849_at    | 2.62E-07   | 1.1651288  | TBC1D8B      | 238067_at    | 0.000648 | 2.2742827  |
| MND1         | 223700_at    | 2.63E-07   | -2.7045173 | RFFL         | 237919_at    | 0.000648 | -1.0659961 |
| P4HB         | 200656_s_at  | 2.64E-07   | -1.3606885 | SFT2D3       | 229141_at    | 0.000649 | 1.0120128  |
| PLSCR4       | 218901_at    | 2.64E-07   | 2.0402885  | SLC27A2      | 205769_at    | 0.000651 | -1.5615582 |
| STMN3        | 222557_at    | 2.65E-07   | 2.0990431  | ZNF578       | 1562245_a_at | 0.000653 | 2.6187098  |
| PRKAR1A      | 200604_s_at  | 2.66E-07   | -1.7176621 | C12orf57     | 224719_s_at  | 0.000653 | 1.3824971  |
| LOC100272217 | 243785_at    | 0.00000027 | 1.8681492  | LOC101928954 | 235826_at    | 0.000654 | 1.0114957  |
| PTPRF        | 200637_s_at  | 2.73E-07   | -1.9799798 | CYAT1        | 1558176_at   | 0.000655 | 1.4513937  |
| ZNF33B       | 1558586_at   | 2.73E-07   | 1.4350387  | DDX19B       | 230974_at    | 0.000655 | 1.5433964  |
| SIDT2        | 56256_at     | 2.74E-07   | 1.23424    | FBXO5        | 234863_x_at  | 0.000657 | -1.6226512 |
| SMAD9        | 227719_at    | 2.76E-07   | 2.8759943  | LOC100130417 | 1555980_a_at | 0.000657 | 1.983662   |
| EPPK1        | 232165_at    | 2.79E-07   | -2.729425  | ZNF268       | 238030_at    | 0.000658 | 1.0334701  |
| ZNF837       | 1556822_s_at | 2.82E-07   | 2.9210073  | YWHAZ        | 200640_at    | 0.00066  | -1.3845926 |

|           |              |            |            |              |              |          |            |
|-----------|--------------|------------|------------|--------------|--------------|----------|------------|
| KIAA1210  | 232332_at    | 2.82E-07   | 3.4802189  | PLPP7        | 224506_s_at  | 0.000662 | 1.6979672  |
| ARMCX4    | 207799_x_at  | 2.85E-07   | 2.5498927  | ID4          | 229386_at    | 0.000664 | 2.0059147  |
| SHCBP1    | 219493_at    | 0.00000029 | -2.2367212 | TICRR        | 230021_at    | 0.000668 | -1.9222059 |
| ITM2A     | 202746_at    | 2.91E-07   | 2.1549515  | CDK10        | 203469_s_at  | 0.000669 | 1.3480959  |
| ZMYM5     | 235620_x_at  | 2.93E-07   | 1.1852588  | LYPLAL1      | 230174_at    | 0.000669 | 2.4607851  |
| DTWD1     | 219291_at    | 2.93E-07   | 1.0907148  | PRKCQ-AS1    | 232001_at    | 0.000669 | 2.0574208  |
| RBBP6     | 1552329_at   | 2.94E-07   | 1.2484089  | PFN1         | 200634_at    | 0.000672 | -1.1054215 |
| MKLN1     | 204423_at    | 2.98E-07   | -1.1982429 | SLC2A8       | 239426_at    | 0.000672 | 1.2156083  |
| MICU3     | 238458_at    | 2.99E-07   | 3.3505054  | GBP1         | 231578_at    | 0.000674 | 1.497975   |
| GATS      | 1553971_a_at | 2.99E-07   | 1.4870557  | ZXDC         | 218639_s_at  | 0.000675 | 1.1819533  |
| TNXB      | 206093_x_at  | 2.99E-07   | 2.5506403  | RGS16        | 209325_s_at  | 0.000679 | -1.5931593 |
| SHC2      | 213464_at    | 0.0000003  | 1.8830371  | FKBP5        | 224856_at    | 0.000679 | -1.1811478 |
| PSMC2     | 201068_s_at  | 3.02E-07   | -1.0564261 | TMX2-CTNND1  | 1557944_s_at | 0.000681 | -1.0531239 |
| TPTEP1    | 243952_at    | 3.06E-07   | 2.8242554  | GDI2         | 200008_s_at  | 0.000685 | -1.1332401 |
| IL13RA1   | 201888_s_at  | 3.11E-07   | -1.4925874 | PABPC1L      | 231838_at    | 0.000686 | 1.4528674  |
| WDR27     | 228326_at    | 3.14E-07   | 2.0922109  | LOC100505555 | 1569157_s_at | 0.000687 | 1.3510041  |
| PEG3-AS1  | 230068_s_at  | 3.24E-07   | 3.2647457  | ICMT         | 201609_x_at  | 0.000687 | -1.3153471 |
| L3MBTL1   | 210306_at    | 3.24E-07   | 1.5936778  | LOC101928269 | 209359_x_at  | 0.000689 | -1.5101358 |
| NPHP3     | 235410_at    | 3.31E-07   | 1.8187018  | CENPU        | 218883_s_at  | 0.000695 | -1.0650161 |
| ARF3      | 200734_s_at  | 3.31E-07   | -1.4215559 | RNF207       | 1555870_at   | 0.000696 | 1.1741866  |
| LINC-PINT | 228702_at    | 3.34E-07   | 2.1794613  | HSPA6        | 213418_at    | 0.000699 | -1.2638335 |
| FAM83D    | 225687_at    | 3.34E-07   | -2.6373408 | TNFSF10      | 202688_at    | 0.000699 | 1.5506387  |
| LINC00667 | 215283_at    | 3.35E-07   | 1.9299746  | CEP85        | 227818_at    | 0.000699 | -1.1396924 |
| GALT      | 203179_at    | 3.35E-07   | 1.1857982  | FAM218A      | 1553710_at   | 0.0007   | 2.0487547  |
| SCD       | 200832_s_at  | 0.00000035 | -2.1723623 | SLC7A3       | 230597_at    | 0.000703 | 1.1476635  |
| ARPC2     | 208679_s_at  | 3.56E-07   | -1.5461602 | GSTT2        | 205439_at    | 0.000703 | 2.2901967  |
| CDC6      | 203967_at    | 3.56E-07   | -1.9585289 | BIRC5        | 202094_at    | 0.000711 | -1.5387223 |

|              |              |            |            |           |              |          |            |
|--------------|--------------|------------|------------|-----------|--------------|----------|------------|
| PATL1        | 225468_at    | 3.75E-07   | -1.5114189 | C9orf72   | 1553133_at   | 0.000713 | 1.8204671  |
| PLA2G6       | 204691_x_at  | 3.78E-07   | 1.2404685  | TFCP2L1   | 219735_s_at  | 0.000713 | -2.0840586 |
| KIAA0101     | 202503_s_at  | 3.78E-07   | -2.159653  | CEACAM6   | 203757_s_at  | 0.000713 | -2.9301804 |
| CASP9        | 203984_s_at  | 3.89E-07   | 1.1485911  | LSM8      | 228529_at    | 0.000722 | 1.1515199  |
| SYAP1        | 225154_at    | 3.93E-07   | -1.3964524 | LINC00526 | 229829_at    | 0.000722 | 1.3341415  |
| TSTA3        | 201644_at    | 3.93E-07   | -1.2172098 | PLN       | 204939_s_at  | 0.000722 | 2.4719517  |
| ISG15        | 205483_s_at  | 3.96E-07   | -2.4678256 | ZSWIM7    | 228719_at    | 0.000723 | 1.5164829  |
| MTHFD2       | 201761_at    | 4.05E-07   | -1.8101222 | CCDC148   | 231504_at    | 0.000724 | 2.0195621  |
| ALOX12-AS1   | 229833_at    | 4.05E-07   | 1.3284454  | USP9X     | 230543_at    | 0.000725 | -1.4493442 |
| BIRC5        | 202095_s_at  | 4.06E-07   | -2.3573047 | HOXD11    | 214604_at    | 0.000726 | 1.2369794  |
| LEPROT       | 227095_at    | 4.15E-07   | 1.2148585  | UQCRC2    | 241755_at    | 0.000727 | 1.2291368  |
| FAM76B       | 226753_at    | 4.19E-07   | 1.0191537  | ZNF404    | 239043_at    | 0.000729 | 2.4185953  |
| NIPBL        | 207108_s_at  | 4.19E-07   | -2.0523997 | ABCA1     | 203504_s_at  | 0.00073  | -1.1188535 |
| FBXL4        | 236994_at    | 4.19E-07   | 1.317314   | GLIPR1    | 214085_x_at  | 0.00073  | 1.2149673  |
| NEDD4L       | 212445_s_at  | 4.19E-07   | -1.8582647 | TNFAIP8L1 | 227420_at    | 0.000734 | -1.2759976 |
| KIF11        | 204444_at    | 4.23E-07   | -2.2948345 | ANGPT2    | 211148_s_at  | 0.000738 | -1.4215716 |
| LOC101928269 | 209360_s_at  | 4.24E-07   | -2.3450739 | SIPA1L2   | 225056_at    | 0.000738 | -1.2045053 |
| MYO15B       | 59375_at     | 4.26E-07   | 1.6049249  | PMP22     | 210139_s_at  | 0.000742 | 1.641613   |
| METTL14      | 241689_at    | 4.29E-07   | 1.1281397  | DFNB59    | 235365_at    | 0.000743 | 1.2476882  |
| PRR11        | 228273_at    | 4.32E-07   | -2.2814136 | DOCK5     | 1570078_a_at | 0.000745 | 2.3279989  |
| BRE-AS1      | 1568768_s_at | 0.00000044 | 1.9880863  | CD58      | 216942_s_at  | 0.000745 | -1.0146165 |
| FGD6         | 226799_at    | 4.42E-07   | -1.8095048 | SARM1     | 213257_at    | 0.000746 | 1.1172456  |
| LOC105369477 | 1558512_at   | 4.43E-07   | 1.1926303  | DGKH      | 216349_at    | 0.000746 | -1.4357213 |
| SSB          | 201138_s_at  | 4.45E-07   | -1.1279244 | ASF1A     | 203427_at    | 0.000749 | 1.1639186  |
| FNDC5        | 226096_at    | 4.53E-07   | 3.0101699  | GPCPD1    | 230492_s_at  | 0.00075  | -1.1948481 |
| ZNF34        | 219801_at    | 4.58E-07   | 1.2170125  | KNL1      | 1552682_a_at | 0.000753 | -1.5973333 |
| MIR424       | 228235_at    | 0.00000046 | 2.8566308  | KATNAL1   | 223790_at    | 0.000753 | -1.2884282 |

|              |                                |            |            |           |              |          |            |
|--------------|--------------------------------|------------|------------|-----------|--------------|----------|------------|
| CLDN8        | 214598_at                      | 0.00000046 | 3.2975393  | C4orf48   | 229860_x_at  | 0.000754 | -1.1924598 |
| SPP1         | 209875_s_at                    | 4.66E-07   | -2.6531999 | FCER1G    | 1554899_s_at | 0.000755 | -1.9247916 |
| LOC101928728 | 238094_at                      | 4.74E-07   | 2.892016   | MIR4458   | 236591_at    | 0.000762 | 1.5194209  |
| CIRBP        | 228519_x_at                    | 4.76E-07   | 1.7191053  | LGR5      | 210393_at    | 0.000765 | -2.2831052 |
| CDCA8        | 221520_s_at                    | 4.76E-07   | -2.6742182 | MATN1-AS1 | 1557557_at   | 0.000765 | 1.7002465  |
| SRRM4        | 230010_at                      | 4.82E-07   | 2.4378865  | IHH       | 215420_at    | 0.000765 | 1.7450133  |
| XPNPEP1      | 208453_s_at                    | 4.84E-07   | -1.1797209 | LINC00515 | 1556414_at   | 0.000765 | 1.0751093  |
| TIAL1        | 230350_at                      | 4.86E-07   | 1.0925183  | RASSF8    | 225946_at    | 0.00077  | 1.6247273  |
| CREBRF       | 235556_at                      | 4.87E-07   | 1.1640758  | TFAP2A    | 204653_at    | 0.000774 | -2.7961473 |
| FAM226B      | 242292_at                      | 5.05E-07   | 2.9816948  | SRPRB     | 222532_at    | 0.000777 | -1.1173172 |
| IL11RA       | 204773_at                      | 0.00000051 | 2.08005    | TMEM220   | 229693_at    | 0.000777 | 1.2183306  |
| CXCL12       | 209687_at                      | 0.00000051 | 3.7258807  | NTRK3     | 213960_at    | 0.000779 | 2.2989037  |
| SARNP        | 229069_at                      | 5.15E-07   | 1.0574405  | PLIN5     | 241368_at    | 0.000781 | 1.2349229  |
| TMEM132B     | 236824_at                      | 5.21E-07   | 3.0742099  | FAM162A   | 224345_x_at  | 0.000784 | -1.0873471 |
| POC1A        | 226355_at                      | 5.21E-07   | -1.3891426 | KLHDC3    | 208784_s_at  | 0.000784 | -1.0518017 |
| TOP2A        | 201292_at                      | 5.27E-07   | -2.1613931 | FBN1      | 202766_s_at  | 0.000784 | 1.6748978  |
| APPBP2       | 202630_at                      | 5.33E-07   | 1.1349732  | PKDCC     | 225380_at    | 0.000785 | 1.9629071  |
| DIO3OS       | 223757_at                      | 5.42E-07   | 3.9164176  | HOXD10    | 238847_at    | 0.000791 | 2.1437155  |
| SPC24        | 235572_at                      | 5.47E-07   | -2.5187311 | FOXC1     | 1553613_s_at | 0.000792 | -2.6085799 |
| CTSF         | 203657_s_at                    | 5.64E-07   | 2.3226187  | FGF2      | 204422_s_at  | 0.000794 | 1.8176176  |
| KDM6A        | 203991_s_at                    | 5.66E-07   | 1.0896603  | EIF1B     | 201738_at    | 0.000795 | 1.0062419  |
|              | AFFX-                          |            |            |           |              |          |            |
| STAT1        | HUMISGF3A/<br>M97935_MA_<br>at | 5.66E-07   | -2.3142785 | ENGASE    | 220349_s_at  | 0.000796 | 1.2123908  |
| TLCD2        | 241359_at                      | 5.72E-07   | -1.4014367 | ZNF527    | 244861_at    | 0.000797 | 1.3484272  |
| RCC2         | 224578_at                      | 5.83E-07   | -1.0335737 | MIR4296   | 1561963_at   | 0.000797 | -1.6258315 |

|              |             |            |            |           |             |          |            |
|--------------|-------------|------------|------------|-----------|-------------|----------|------------|
| SGPP2        | 244780_at   | 5.85E-07   | -2.0790735 | SGPP2     | 238567_at   | 0.000797 | -1.4515197 |
| APEX2        | 204408_at   | 5.98E-07   | -1.4058216 | VWA1      | 222723_at   | 0.000798 | -1.6251103 |
| TIMELESS     | 203046_s_at | 5.98E-07   | -1.1976575 | SPX       | 229778_at   | 0.000798 | 2.4999921  |
| TRAF3IP2-AS1 | 230589_at   | 5.98E-07   | 3.2707997  | HCN1      | 1556351_at  | 0.000798 | 2.3624713  |
| PDGFD        | 219304_s_at | 5.98E-07   | 2.0812667  | INTS7     | 222250_s_at | 0.000799 | -1.0381725 |
| FBXL16       | 227641_at   | 0.0000006  | 1.8951658  | MFSD6     | 225325_at   | 0.000803 | -1.0552571 |
| MKI67        | 212023_s_at | 6.05E-07   | -2.4313329 | ZNF703    | 230586_s_at | 0.000808 | 1.874042   |
| CXorf57      | 219355_at   | 6.07E-07   | 3.497661   | PDGFRA    | 215305_at   | 0.000808 | 1.9907817  |
| PTPRF        | 200635_s_at | 6.13E-07   | -1.2590672 | MAGED2    | 208682_s_at | 0.00081  | 1.13168    |
| PBK          | 219148_at   | 6.18E-07   | -2.6892589 | SQSTM1    | 213112_s_at | 0.000812 | -1.5786288 |
| CCNYL1       | 228810_at   | 6.21E-07   | -1.5645604 | EXOC7     | 212026_s_at | 0.000814 | 1.1959316  |
| CCNJ         | 219470_x_at | 6.22E-07   | -1.2388563 | ZADH2     | 243417_at   | 0.000816 | 1.2625892  |
| SNX4         | 205329_s_at | 6.36E-07   | -1.6393733 | PCDH7     | 228640_at   | 0.000818 | 2.2498216  |
| NT5E         | 227486_at   | 6.36E-07   | 3.0847941  | ANAPC4    | 226917_s_at | 0.000818 | 1.3405417  |
| NAV1         | 227584_at   | 6.39E-07   | -2.0356571 | PARTICL   | 238887_at   | 0.000828 | 1.0462209  |
| ZNF302       | 228392_at   | 6.44E-07   | 1.8182432  | MAP4      | 200836_s_at | 0.000829 | -1.2044778 |
| WARS         | 200628_s_at | 6.44E-07   | -2.8750709 | TMPRSS2   | 211689_s_at | 0.00083  | -1.9621398 |
| OAS1         | 205552_s_at | 6.44E-07   | -2.9134128 | CYP4F12   | 206539_s_at | 0.000833 | 1.969024   |
| ID4          | 226933_s_at | 6.52E-07   | 2.6846752  | ZNF781    | 1552785_at  | 0.000836 | 1.6200349  |
| KIAA0368     | 212427_at   | 6.57E-07   | 1.2509242  | ZNF311    | 236550_s_at | 0.000837 | 1.8337739  |
| CDCA3        | 223307_at   | 6.57E-07   | -2.1406858 | PAFAH1B2  | 210160_at   | 0.000839 | -1.0592036 |
| ACADSB       | 226030_at   | 0.00000066 | 1.1815724  | SDF2L1    | 218681_s_at | 0.000839 | -1.0584304 |
| ILVBL        | 210624_s_at | 6.62E-07   | 1.1682571  | WIF1      | 204712_at   | 0.000839 | 3.9966016  |
| ARPC1B       | 201954_at   | 6.67E-07   | -1.4505694 | CLU       | 222043_at   | 0.000844 | 1.999945   |
| TMEM132B     | 236468_at   | 6.67E-07   | 2.1699416  | MSI2      | 225238_at   | 0.000846 | -1.4641937 |
| RAB27A       | 209514_s_at | 6.67E-07   | -1.3011628 | ZNF559    | 224518_s_at | 0.000849 | 1.1328851  |
| CNRIP1       | 226751_at   | 6.67E-07   | 1.9681235  | RPARP-AS1 | 213964_x_at | 0.00085  | 2.246616   |

|              |             |            |            |              |              |          |            |
|--------------|-------------|------------|------------|--------------|--------------|----------|------------|
| TNXB         | 216333_x_at | 6.67E-07   | 2.4286828  | ADCY10P1     | 236832_at    | 0.000859 | 1.3455398  |
| USP3         | 226652_at   | 6.67E-07   | 1.0257489  | RPS14        | 208645_s_at  | 0.00086  | 1.1430792  |
| ZNF564       | 1553957_at  | 0.00000067 | 1.0269919  | L3MBTL4      | 228557_at    | 0.000861 | 1.6994896  |
| MKI67        | 212021_s_at | 0.00000067 | -1.7505912 | TPM4         | 1559989_at   | 0.000867 | 1.5896247  |
| FBXL3        | 225132_at   | 6.84E-07   | 1.2650898  | U2AF1L4      | 226700_at    | 0.000869 | 1.3516177  |
| ROBO3        | 219550_at   | 6.95E-07   | 2.8749091  | MCCC2        | 209624_s_at  | 0.000874 | -1.022336  |
| P2RY14       | 206637_at   | 6.95E-07   | 2.57986    | LOC100288637 | 1558750_a_at | 0.000875 | -1.410923  |
| MIRLET7D     | 227793_at   | 6.97E-07   | 1.6000072  | CCDC88C      | 215343_at    | 0.000879 | -1.1627247 |
| KRBOX1       | 228721_at   | 7.03E-07   | 1.3732522  | ZEB1         | 212764_at    | 0.000882 | 1.5027822  |
| LOC100506548 | 224763_at   | 0.00000071 | 1.5520801  | PLCL1        | 205934_at    | 0.000884 | 1.7086073  |
| RRN3P1       | 216908_x_at | 0.00000071 | 2.069062   | MRPL42       | 222466_s_at  | 0.000887 | -1.0865001 |
| EPOR         | 37986_at    | 7.12E-07   | 1.7757132  | RGL1         | 209568_s_at  | 0.000887 | 1.1829506  |
| PLAGL1       | 207002_s_at | 7.14E-07   | 2.5471154  | SAMD8        | 242062_at    | 0.000891 | -1.2320382 |
| C8orf46      | 229430_at   | 7.16E-07   | 2.7758754  | GATS         | 227321_at    | 0.000891 | 1.3922456  |
| ALKBH8       | 235610_at   | 7.16E-07   | 1.0092431  | REM1         | 210300_at    | 0.000893 | 1.1207879  |
| C12orf29     | 213701_at   | 7.16E-07   | 1.2317885  | MRS2         | 228542_at    | 0.000895 | -1.1623559 |
| PTBP3        | 207223_s_at | 7.17E-07   | -1.4806043 | SDHAP2       | 226693_at    | 0.000895 | 1.1082662  |
| STX16        | 221499_s_at | 7.22E-07   | 1.1330448  | APLP2        | 208702_x_at  | 0.0009   | -1.3473997 |
| SYNPO2       | 227662_at   | 0.00000077 | 2.9488088  | AKT2         | 1560689_s_at | 0.0009   | 1.0046404  |
| PLAUR        | 211924_s_at | 7.83E-07   | -2.4045843 | HHIPL1       | 1556564_at   | 0.000905 | -1.6744345 |
| VAV3         | 218807_at   | 7.86E-07   | -2.4032241 | HSF4         | 210977_s_at  | 0.000907 | 1.5609382  |
| EWSR1        | 210011_s_at | 7.88E-07   | -1.3725106 | NSD1         | 235760_at    | 0.000909 | -1.2576577 |
| SOCS5        | 209648_x_at | 7.91E-07   | 1.1457188  | STK4         | 205411_at    | 0.00091  | -1.1751375 |
| NIT1         | 241395_at   | 7.93E-07   | 1.9446789  | LPP          | 241879_at    | 0.000912 | -1.2128752 |
| NAV1         | 224771_at   | 8.08E-07   | -2.26301   | WWC2         | 222738_at    | 0.00092  | 1.0614892  |
| EPC1         | 238633_at   | 8.08E-07   | 1.3548179  | LINC00476    | 239799_at    | 0.000921 | 1.2755416  |
| PCNP         | 217816_s_at | 8.13E-07   | 1.3134892  | FKBP5        | 224840_at    | 0.000922 | -1.7787944 |

|             |              |            |            |           |              |          |            |
|-------------|--------------|------------|------------|-----------|--------------|----------|------------|
| ENTPD7      | 220153_at    | 8.16E-07   | -1.7301937 | LINC00959 | 229323_at    | 0.000922 | 1.4606254  |
| PDS5A       | 212138_at    | 8.18E-07   | -1.010663  | CHCHD7    | 222701_s_at  | 0.000922 | -1.0327097 |
| SMC4        | 201663_s_at  | 8.24E-07   | -1.6907363 | PPP3R1    | 204507_s_at  | 0.000923 | -1.4733476 |
| SBK1        | 226549_at    | 8.24E-07   | -1.9820802 | SEC61A1   | 222385_x_at  | 0.000923 | -1.1372228 |
| TPTE2P6     | 233675_s_at  | 8.24E-07   | 3.5127176  | FASTKD2   | 205976_at    | 0.000924 | 1.1052756  |
| CHD4        | 201183_s_at  | 8.25E-07   | -1.3439908 | KANK4     | 229125_at    | 0.000924 | -3.0903696 |
| PSMF1       | 201053_s_at  | 8.28E-07   | 1.2661836  | C5orf24   | 1553106_at   | 0.000924 | -1.9683511 |
| JAZF1       | 225798_at    | 8.32E-07   | 1.8111538  | KLF11     | 218486_at    | 0.000926 | 1.0553655  |
| MAP3K1      | 225927_at    | 8.37E-07   | 1.2617688  | CCNF      | 204827_s_at  | 0.000926 | -2.0193205 |
| PALM2-AKAP2 | 202760_s_at  | 8.42E-07   | -2.0291096 | DLEU2     | 1556821_x_at | 0.000928 | -1.7652931 |
| TPR         | 228709_at    | 8.52E-07   | 1.1827859  | LAD1      | 216641_s_at  | 0.000931 | -1.3914215 |
| PIAS1       | 217862_at    | 8.57E-07   | 1.0276497  | NABP1     | 219334_s_at  | 0.000933 | 1.3686435  |
| LMOD1       | 203766_s_at  | 8.64E-07   | 3.2035074  | GPSM2     | 230002_at    | 0.000937 | -1.4855776 |
| COPA        | 208684_at    | 8.65E-07   | -1.408208  | FCGR1B    | 214511_x_at  | 0.000938 | -1.5102752 |
| RAD52       | 205647_at    | 8.72E-07   | 1.7935891  | TNXB      | 208609_s_at  | 0.000946 | 1.4191116  |
| SLC6A2      | 210353_s_at  | 8.72E-07   | 3.1876222  | CD44      | 1557905_s_at | 0.000946 | -1.8428075 |
| ACTR2       | 200727_s_at  | 8.72E-07   | -1.7498681 | MRPS18C   | 220103_s_at  | 0.00095  | 1.8798662  |
| FGF7P3      | 1554741_s_at | 8.74E-07   | 2.0525513  | EPRS      | 200841_s_at  | 0.000951 | -1.5504432 |
| TMEM53      | 1554077_a_at | 8.74E-07   | -1.0220454 | ENPP1     | 229088_at    | 0.000952 | 2.1090619  |
| DCAF7       | 221745_at    | 8.79E-07   | -1.0845211 | ZNF83     | 236429_at    | 0.000954 | -1.2508237 |
| MREG        | 232682_at    | 9.01E-07   | -1.373053  | DNAJB6    | 209015_s_at  | 0.000955 | -1.1691553 |
| SULF1       | 212354_at    | 9.02E-07   | -2.2899281 | LSAMP     | 228218_at    | 0.000956 | 2.1107701  |
| YKT6        | 217785_s_at  | 9.05E-07   | -2.4447891 | CEACAM6   | 211657_at    | 0.000958 | -2.2630165 |
| CORO2A      | 205538_at    | 9.11E-07   | -1.2842706 | MEOX2     | 206201_s_at  | 0.000958 | 2.5842797  |
| AIFM2       | 224461_s_at  | 9.13E-07   | -2.4972234 | LRRC75B   | 228064_at    | 0.000961 | 1.2969202  |
| KIF23       | 204709_s_at  | 9.26E-07   | -2.7616153 | VWA1      | 218731_s_at  | 0.000965 | -1.7555111 |
| HNRNPAB     | 201277_s_at  | 0.00000093 | -1.6826776 | FAM92A1   | 228011_at    | 0.000965 | 1.0584587  |

|              |              |            |            |               |              |          |            |
|--------------|--------------|------------|------------|---------------|--------------|----------|------------|
| CLN5         | 214252_s_at  | 9.45E-07   | 1.1691516  | ZDHHC2        | 244779_at    | 0.000965 | 2.2630804  |
| EXD2         | 229131_at    | 0.00000095 | 1.0474385  | NREP          | 230424_at    | 0.000969 | 1.1640753  |
| HJURP        | 218726_at    | 9.76E-07   | -2.1333595 | WISP1         | 229802_at    | 0.000969 | 1.3547898  |
| UHRF1        | 225655_at    | 9.76E-07   | -2.0633408 | ZNF254        | 1559449_a_at | 0.000977 | -1.4764797 |
| LINC00667    | 228160_at    | 9.87E-07   | 2.5800775  | TIGD6         | 220986_s_at  | 0.000979 | 1.0879655  |
| MTERF2       | 225346_at    | 9.98E-07   | 1.1007677  | ZFP2          | 207757_at    | 0.00098  | 1.7504082  |
| MINCR        | 235428_at    | 0.000001   | 1.4994104  | MXRA7         | 212509_s_at  | 0.000982 | 1.1839055  |
| ANGPTL1      | 231773_at    | 0.00000101 | 4.9077031  | SNORD116-21   | 232976_at    | 0.000985 | 2.0299548  |
| NACA         | 222018_at    | 0.00000101 | 1.2173778  | DYSF          | 218660_at    | 0.000985 | -1.2331083 |
| RGS20        | 1569303_s_at | 0.00000101 | 1.9843507  | GABRP         | 205044_at    | 0.000985 | 3.2049273  |
| SERP2        | 239889_at    | 0.00000101 | 3.353669   | TRAM1L1       | 244334_at    | 0.00099  | 1.7595604  |
| KDSR         | 229850_at    | 0.00000101 | 1.3116808  | OTUD5         | 1555426_a_at | 0.00099  | -1.6061054 |
| LINC00909    | 226924_at    | 0.00000101 | 1.2493973  | TRA2B         | 210180_s_at  | 0.000991 | 1.0230267  |
| SPC25        | 209891_at    | 0.00000102 | -2.5393918 | ATG16L2       | 229389_at    | 0.000991 | 1.379396   |
| LOC101930115 | 230721_at    | 0.00000102 | 1.2032205  | LOC401433     | 1560109_s_at | 0.000991 | 2.6183715  |
| DHFR         | 202532_s_at  | 0.00000102 | -1.2456511 | TCF19         | 223274_at    | 0.000994 | -1.0280992 |
| SKA2         | 225686_at    | 0.00000103 | -1.1350612 | KLF16         | 224111_x_at  | 0.000994 | -1.139266  |
| OGT          | 229787_s_at  | 0.00000104 | 2.0357213  | SUCLG2-AS1    | 1564097_at   | 0.000997 | 2.0938038  |
| PDK3         | 206348_s_at  | 0.00000104 | -2.8542809 | MIR6872       | 203071_at    | 0.000997 | 1.4747114  |
| TES          | 202719_s_at  | 0.00000105 | -1.509918  | PPIB          | 200967_at    | 0.000998 | -1.0692712 |
| SRGAP1       | 233888_s_at  | 0.00000107 | -2.0007186 | SMC1A         | 1555677_s_at | 0.000999 | -2.7117058 |
| MPZL1        | 210594_x_at  | 0.00000109 | -2.1346468 | SPATA17       | 1552269_at   | 0.001    | -1.9754607 |
| FAM222B      | 229418_at    | 0.00000109 | -1.1243549 | VEGFA         | 211527_x_at  | 0.001    | -1.5872716 |
| ZNF311       | 236551_at    | 0.0000011  | 3.0766455  | ZNF559-ZNF177 | 207417_s_at  | 0.001    | 1.0234187  |
| KIF4A        | 218355_at    | 0.0000011  | -1.8640644 | DPT           | 213068_at    | 0.00101  | 2.2339763  |
| DPY30        | 1555522_s_at | 0.00000111 | -1.1486912 | FBXL22        | 241350_at    | 0.00101  | 1.9578982  |
| VILL         | 209950_s_at  | 0.00000111 | 2.6208065  | C1orf21       | 221272_s_at  | 0.00101  | 1.5757743  |

|              |              |            |            |              |              |         |            |
|--------------|--------------|------------|------------|--------------|--------------|---------|------------|
| BAIAP2L1     | 227372_s_at  | 0.00000112 | -1.446139  | CDCA2        | 236957_at    | 0.00101 | -1.8085883 |
| LOC100128108 | 243957_at    | 0.00000113 | 2.2925036  | LINC00886    | 230780_at    | 0.00101 | 1.4413195  |
| AGO1         | 222576_s_at  | 0.00000114 | -1.6251709 | DLEU2        | 1556820_a_at | 0.00102 | -1.6634181 |
| ZNF300P1     | 244289_at    | 0.00000115 | 2.6909148  | RNF139-AS1   | 227745_at    | 0.00102 | 1.1101005  |
| ABCA8        | 204719_at    | 0.00000115 | 3.6602507  | LOC102724275 | 241804_at    | 0.00102 | 1.0500831  |
| PSMD11       | 208777_s_at  | 0.00000117 | -1.2768267 | VDAC3        | 208846_s_at  | 0.00102 | -1.5113626 |
| ACTR2        | 1554390_s_at | 0.00000118 | -1.6031535 | MUM1         | 230461_s_at  | 0.00102 | 1.8702885  |
| DEPDC1       | 222958_s_at  | 0.0000012  | -2.58033   | OAF          | 225510_at    | 0.00103 | 1.0104335  |
| TK1          | 202338_at    | 0.0000012  | -1.6289892 | C1orf116     | 228865_at    | 0.00103 | -1.8907771 |
| BCLAF1       | 229454_at    | 0.00000121 | 1.6199282  | SFRP2        | 223122_s_at  | 0.00103 | -3.0834097 |
| UCA1         | 227919_at    | 0.00000121 | 3.1298563  | FDXACB1      | 229989_at    | 0.00103 | 1.0902242  |
| PATL1        | 235235_s_at  | 0.00000121 | -1.7397431 | BORCS7       | 225334_at    | 0.00103 | 1.1743052  |
| CASP6        | 209790_s_at  | 0.00000121 | -1.3015864 | SLITRK6      | 235976_at    | 0.00103 | 3.2089595  |
| DNAJC27      | 227859_at    | 0.00000122 | 1.1699588  | LINC00869    | 1563483_at   | 0.00103 | 1.0639469  |
| GALNT2       | 223991_s_at  | 0.00000122 | -1.3471365 | COL1A1       | 202311_s_at  | 0.00105 | -1.1758938 |
| RORB         | 231040_at    | 0.00000122 | 3.5636366  | PLEKHB2      | 201411_s_at  | 0.00105 | -1.3923882 |
| EIF4G1       | 208625_s_at  | 0.00000127 | -1.2936295 | GADD45B      | 213560_at    | 0.00105 | 1.7783293  |
| ZNF207       | 228157_at    | 0.00000128 | 1.6227165  | TRNT1        | 1552625_a_at | 0.00105 | -1.2118646 |
| PITPNA-AS1   | 228972_at    | 0.00000128 | 1.3889673  | E2F1         | 2028_s_at    | 0.00105 | -1.0189692 |
| SSBP2        | 238483_at    | 0.00000128 | 1.5680635  | XPO5         | 223056_s_at  | 0.00105 | -1.026384  |
| ID3          | 207826_s_at  | 0.0000013  | 3.0579294  | MST1L        | 215563_s_at  | 0.00105 | 1.8398043  |
| LOC101930363 | 214945_at    | 0.0000013  | 2.7929978  | LOC101927668 | 237192_at    | 0.00105 | 1.6785618  |
| MTCH2        | 217772_s_at  | 0.0000013  | -1.4680843 | PNKD         | 233177_s_at  | 0.00105 | -1.268677  |
| ERO1A        | 225750_at    | 0.0000013  | -1.7420012 | ADIG         | 1554128_at   | 0.00105 | -1.9805053 |
| TSHZ3        | 223393_s_at  | 0.0000013  | 2.3076451  | INPP4A       | 208363_s_at  | 0.00106 | -1.473703  |
| GSTM3        | 235867_at    | 0.00000131 | 1.3605068  | TMCO3        | 220240_s_at  | 0.00106 | -1.443688  |
| ZMYM2        | 226512_at    | 0.00000132 | 1.0726933  | LIMS4        | 223800_s_at  | 0.00106 | 2.2640999  |

|          |              |            |            |              |                           |         |            |
|----------|--------------|------------|------------|--------------|---------------------------|---------|------------|
| GNG11    | 204115_at    | 0.00000132 | 1.8287498  | CLN8         | 222874_s_at               | 0.00106 | -1.2746264 |
| EGR1     | 201693_s_at  | 0.00000132 | 1.9869826  | SPG20        | 236600_at                 | 0.00106 | 1.3504366  |
| PRDM5    | 235764_at    | 0.00000135 | 2.4580022  | LOC101930349 | 225817_at                 | 0.00106 | 1.220233   |
| GAS7     | 202191_s_at  | 0.00000135 | 2.2316745  | RBM19        | 206019_at                 | 0.00106 | 1.0989353  |
| STAM2    | 215044_s_at  | 0.00000136 | -1.0488333 | UXT          | 218495_at                 | 0.00106 | 1.0147506  |
| TMEM200B | 227386_s_at  | 0.00000136 | 1.6634983  | ASAH1        | 1555419_a_at              | 0.00106 | -1.5054537 |
| ITCH     | 209744_x_at  | 0.0000014  | -1.175806  | HSPB8        | 233057_at                 | 0.00106 | 1.206199   |
| TBC1D32  | 232038_at    | 0.00000141 | 1.4644579  | ZNF677       | 228974_at                 | 0.00106 | 2.0431402  |
| SEC22A   | 238078_at    | 0.00000142 | 1.0759458  | SPTLC3       | 236201_at                 | 0.00107 | 1.1178953  |
| CLIC4    | 221881_s_at  | 0.00000143 | -2.0692753 | LINC00899    | 1556304_s_at              | 0.00107 | 1.4880593  |
| GDF7     | 214238_at    | 0.00000145 | 1.8968373  | TOPORS-AS1   | 221979_at                 | 0.00107 | 1.6032715  |
| LAYN     | 228080_at    | 0.00000145 | 1.3811611  | ST13         | 208667_s_at               | 0.00107 | 1.1228979  |
| CELF6    | 227775_at    | 0.00000145 | 1.9004064  | VEGFA        | 212171_x_at               | 0.00108 | -1.231869  |
| NR3C2    | 205259_at    | 0.00000148 | 2.8548977  | NABP1        | 233085_s_at               | 0.00108 | 1.2835382  |
| THBS1    | 235086_at    | 0.00000149 | 2.0133386  | MIR1178      | 242872_at                 | 0.00108 | -2.139216  |
| NCOA3    | 211352_s_at  | 0.0000015  | -1.4853114 | PAX5         | 206802_at                 | 0.00108 | 1.6983536  |
| CBX3     | 201091_s_at  | 0.0000015  | -1.0360779 | FGFR2        | 203638_s_at               | 0.00108 | 1.5803096  |
| ARPC5L   | 226914_at    | 0.0000015  | -1.4061603 | CD1A         | 210325_at                 | 0.00108 | -1.2666834 |
|          |              |            |            |              | AFFX-                     |         |            |
| MIR24-2  | 1555847_a_at | 0.00000151 | 1.8060561  | STAT1        | HUMISGF3A/<br>M97935_5_at | 0.00109 | -1.6971608 |
| KNL1     | 228323_at    | 0.00000151 | -1.7838874 | GPLD1        | 238752_at                 | 0.00109 | 1.7414437  |
| CIRBP    | 200810_s_at  | 0.00000153 | 1.1380472  | NFIA         | 1557639_at                | 0.00109 | 2.155304   |
| SYNCRIP  | 1555427_s_at | 0.00000153 | -1.7546787 | LINC00240    | 1568854_at                | 0.00109 | 1.3959373  |
| SPICE1   | 234995_at    | 0.00000154 | 1.1522544  | PSAT1        | 220892_s_at               | 0.0011  | -1.1430535 |
| RAB27A   | 210951_x_at  | 0.00000155 | -1.3693066 | SH3BGRL3     | 221269_s_at               | 0.0011  | -1.3401084 |
| GGCT     | 215380_s_at  | 0.00000155 | -1.5068959 | TMPRSS4      | 218960_at                 | 0.0011  | -2.4450586 |

|              |              |            |            |              |              |         |            |
|--------------|--------------|------------|------------|--------------|--------------|---------|------------|
| LOC100507577 | 221833_at    | 0.00000155 | 1.8623246  | ABCC4        | 1554918_a_at | 0.0011  | -1.7766159 |
| ZSCAN26      | 213218_at    | 0.00000157 | 1.0912162  | CELF5        | 232416_at    | 0.0011  | 1.3364841  |
| RNASEH2C     | 227543_at    | 0.00000157 | 1.2312116  | LOC101928230 | 230386_at    | 0.0011  | 1.1693792  |
| NIN          | 224304_x_at  | 0.00000157 | -1.3312558 | TGFB1I1      | 209651_at    | 0.00111 | 1.187116   |
| SP4          | 236265_at    | 0.00000158 | 1.1124     | FAM184A      | 1558523_at   | 0.00111 | 2.4124168  |
| DEPDC1       | 235545_at    | 0.00000163 | -2.2885186 | HS6ST1       | 225263_at    | 0.00111 | -1.1065127 |
| SFRP4        | 204052_s_at  | 0.00000163 | 5.2696289  | SENP7        | 223444_at    | 0.00111 | 1.0473914  |
| DEFB124      | 1568377_x_at | 0.00000163 | 2.6238139  | RPS9         | 214317_x_at  | 0.00111 | 1.237232   |
| DICER1-AS1   | 229227_at    | 0.00000164 | 1.4201202  | GPHN         | 220773_s_at  | 0.00112 | -1.5167066 |
| WDR37        | 242255_at    | 0.00000166 | 1.3470798  | NHSL1        | 231034_s_at  | 0.00113 | -1.6397728 |
| PCED1A       | 225505_s_at  | 0.00000167 | 1.4664292  | ANKRD2       | 221232_s_at  | 0.00113 | -1.674426  |
| ZNF334       | 238566_at    | 0.00000169 | 2.9552257  | FGFR3        | 204379_s_at  | 0.00113 | 2.6425129  |
| ACLY         | 201127_s_at  | 0.00000169 | -1.2662354 | TPM4         | 212481_s_at  | 0.00113 | -1.4061963 |
| C6orf120     | 221787_at    | 0.00000169 | 1.1632436  | TMEM116      | 234133_s_at  | 0.00113 | 1.6093176  |
| KRT8         | 209008_x_at  | 0.00000169 | -1.9185302 | EML4         | 223069_s_at  | 0.00114 | -1.0188445 |
| ATF3         | 202672_s_at  | 0.0000017  | 2.435997   | DENND1A      | 219763_at    | 0.00114 | -1.7739974 |
| E2F8         | 219990_at    | 0.0000017  | -2.1963371 | LINC00667    | 226235_at    | 0.00114 | 1.5993901  |
| IDE          | 217496_s_at  | 0.0000017  | -1.1653917 | LOC101928728 | 241668_s_at  | 0.00115 | 1.7714625  |
| ATOH8        | 228890_at    | 0.00000172 | 1.9981563  | PRKAB1       | 201835_s_at  | 0.00115 | -1.6752786 |
| SFRP4        | 204051_s_at  | 0.00000174 | 3.5086004  | TTC28-AS1    | 1555871_at   | 0.00115 | 1.3904244  |
| CYR61        | 210764_s_at  | 0.00000176 | 1.8012144  | MIRLET7BHG   | 232480_at    | 0.00115 | 1.4735801  |
| CENPE        | 205046_at    | 0.00000177 | -2.1904418 | PITX1        | 209587_at    | 0.00115 | -2.2792611 |
| GLIS1        | 244128_x_at  | 0.00000177 | 2.2518132  | BGN          | 201261_x_at  | 0.00115 | -1.3418793 |
| HNRNPDL      | 209068_at    | 0.00000177 | 1.5024206  | LOC101929373 | 1553633_s_at | 0.00115 | 1.2802416  |
| ATP7A        | 205198_s_at  | 0.00000178 | 1.0147827  | HSPB1        | 201841_s_at  | 0.00115 | -1.4601641 |
| SGO2         | 235425_at    | 0.0000018  | -1.980013  | HILPDA       | 218507_at    | 0.00115 | -1.3755026 |
| TTC33        | 219421_at    | 0.00000183 | 1.1995018  | RBM20        | 238763_at    | 0.00115 | 2.2537992  |

|              |             |            |            |              |             |         |            |
|--------------|-------------|------------|------------|--------------|-------------|---------|------------|
| VAV3         | 218806_s_at | 0.00000183 | -2.7668406 | IARS2        | 217900_at   | 0.00115 | -1.0749641 |
| CORO1C       | 221676_s_at | 0.00000189 | -1.6650276 | LINC01023    | 231046_at   | 0.00116 | 1.2347953  |
| TSC22D1      | 215111_s_at | 0.00000191 | 1.2946957  | SMS          | 202043_s_at | 0.00116 | -1.1008986 |
| NUF2         | 223381_at   | 0.00000192 | -2.6303031 | DLAT         | 211150_s_at | 0.00116 | -1.4916711 |
| C16orf89     | 229177_at   | 0.00000192 | 4.0486819  | CNTN3        | 229831_at   | 0.00117 | 3.2322682  |
| SOCS2        | 203373_at   | 0.00000192 | 1.8772964  | CLCNKB       | 1554748_at  | 0.00117 | 1.7974019  |
| WNT4         | 208606_s_at | 0.00000195 | 3.2129217  | RUNX1T1      | 228827_at   | 0.00118 | 1.8235587  |
| LOC100507577 | 221834_at   | 0.00000197 | 1.6014438  | ANP32A       | 201043_s_at | 0.00118 | -2.0638899 |
| SLC52A2      | 222155_s_at | 0.00000197 | -1.6816566 | KBTBD7       | 223412_at   | 0.00118 | 1.1060503  |
| CDC25B       | 201853_s_at | 0.00000198 | -1.5057116 | SERPINF1     | 202283_at   | 0.00119 | 1.5159237  |
| MIR1247      | 239727_at   | 0.00000199 | 2.3418626  | FAM65C       | 227654_at   | 0.00119 | 1.6464557  |
| SRPX         | 204955_at   | 0.00000202 | 2.1938447  | EME1         | 234465_at   | 0.00119 | -1.263526  |
| HEY2         | 219743_at   | 0.00000204 | 2.7807624  | PXN-AS1      | 227332_at   | 0.00119 | 1.5666084  |
| PAM          | 214620_x_at | 0.00000205 | 2.1699965  | CPD          | 201942_s_at | 0.00119 | -1.3374515 |
| LOC105377371 | 1559102_at  | 0.00000205 | 1.186856   | CDH11        | 236179_at   | 0.00121 | 2.1675586  |
| MXRA8        | 213422_s_at | 0.00000205 | 1.6527386  | ZNHIT6       | 233005_at   | 0.00121 | 1.0364885  |
| GNB1         | 200744_s_at | 0.00000205 | -1.3441689 | STAT1        | 209969_s_at | 0.00121 | -1.2604426 |
| CASC7        | 1561042_at  | 0.00000205 | -1.5754083 | LSM4         | 202737_s_at | 0.00122 | -1.0140929 |
| CREBZF       | 225595_at   | 0.00000205 | 1.4679193  | CD200        | 209582_s_at | 0.00122 | 1.5572275  |
| ASPM         | 232238_at   | 0.00000205 | -2.5451912 | PGM5-AS1     | 231024_at   | 0.00122 | 1.0682407  |
| SMARCA4      | 214728_x_at | 0.00000205 | -1.0904913 | KIZ          | 228290_at   | 0.00122 | 2.1593414  |
| CD164        | 208653_s_at | 0.00000206 | -1.6210773 | ZDHHC17      | 212982_at   | 0.00122 | 1.0212333  |
| OGFOD1       | 241739_at   | 0.00000211 | 1.5842984  | AP2S1        | 211047_x_at | 0.00122 | -1.0032506 |
| LOC101928307 | 1558795_at  | 0.00000211 | 2.8955722  | SLITRK4      | 230680_at   | 0.00123 | 2.6873611  |
| MAMDC2       | 228885_at   | 0.00000212 | 2.5583155  | RBM43        | 228304_at   | 0.00123 | 1.047956   |
| MFAP4        | 212713_at   | 0.00000215 | 2.8704689  | GIMAP2       | 232024_at   | 0.00124 | 1.6631988  |
| LAMP3        | 205569_at   | 0.00000215 | -2.6195872 | LOC102725108 | 1559950_at  | 0.00125 | 1.6344406  |

|              |             |            |            |              |              |         |            |
|--------------|-------------|------------|------------|--------------|--------------|---------|------------|
| ESD          | 215095_at   | 0.00000216 | 1.7747845  | PRND         | 222106_at    | 0.00125 | 1.2910727  |
| LINC00938    | 242523_at   | 0.00000217 | 1.347716   | SLC41A2      | 223798_at    | 0.00125 | -1.357526  |
| LOC153682    | 232794_at   | 0.00000217 | 1.6147746  | MYC          | 202431_s_at  | 0.00125 | 1.2742751  |
| TNFSF10      | 214329_x_at | 0.00000217 | 2.1746628  | LOC285147    | 236166_at    | 0.00125 | 1.5279472  |
| SERP2        | 228044_at   | 0.00000217 | 2.4536706  | KRT6B        | 209126_x_at  | 0.00126 | -1.6703421 |
| NR2F2        | 229092_at   | 0.00000217 | 1.4380063  | ARHGEF10     | 216620_s_at  | 0.00126 | 1.0520344  |
| ECHDC1       | 233124_s_at | 0.00000217 | -1.4312265 | LYRM4        | 222672_at    | 0.00126 | 1.0538488  |
| PTBP3        | 214697_s_at | 0.00000219 | -1.6658187 | ZNF784       | 228364_at    | 0.00126 | 1.5641713  |
| SYNCRIP      | 209024_s_at | 0.00000223 | -1.9483042 | TUSC3        | 235801_at    | 0.00127 | 1.6139024  |
| LOC102724851 | 236353_at   | 0.00000223 | 2.1511921  | NHSL1        | 234321_x_at  | 0.00127 | -1.0109617 |
| AMOTL2       | 203002_at   | 0.00000224 | 1.3082874  | ICAM1        | 202637_s_at  | 0.00127 | -1.0126301 |
| IHH          | 229358_at   | 0.00000232 | 4.3652536  | SCML1        | 222747_s_at  | 0.00128 | 1.9438121  |
| LOC100129518 | 215223_s_at | 0.00000232 | -2.3436892 | LPCAT2       | 222833_at    | 0.00128 | 1.3567295  |
| DOCK9-AS2    | 231062_at   | 0.00000232 | 1.1817529  | PPP1R3E      | 229001_at    | 0.00128 | 1.035053   |
| NDST2        | 203916_at   | 0.00000232 | 1.0758503  | PPM1F        | 203063_at    | 0.00128 | 1.025744   |
| LOC101930115 | 227351_at   | 0.00000232 | 1.3798783  | SLC16A11     | 1552761_at   | 0.00128 | 1.3387139  |
| KIF2C        | 209408_at   | 0.00000234 | -1.7336603 | LOC100505555 | 1569156_at   | 0.00129 | 1.8529005  |
| SMAP2        | 225282_at   | 0.00000234 | -1.2201672 | ZC3H14       | 242443_at    | 0.0013  | 1.2615254  |
| DOPEY2       | 205248_at   | 0.00000234 | -1.7021498 | LOC102725271 | 222020_s_at  | 0.0013  | -1.5215168 |
| EFEMP2       | 206580_s_at | 0.00000235 | 1.5464534  | FBXO9        | 212991_at    | 0.00131 | 1.0869725  |
| PLK4         | 204887_s_at | 0.00000237 | -1.8788118 | MICALL2      | 1555862_s_at | 0.00131 | -2.1440301 |
| FAM228B      | 230435_at   | 0.00000248 | 1.3819564  | FZD1         | 204451_at    | 0.00132 | 1.0523702  |
| C1orf21      | 223126_s_at | 0.00000248 | 1.6242532  | INTU         | 228946_at    | 0.00132 | 1.1527866  |
| LOC644656    | 229870_at   | 0.00000251 | 1.3167568  | PGD          | 201118_at    | 0.00133 | -1.4860394 |
| IL21R        | 237753_at   | 0.00000252 | -2.2504164 | CEP44        | 231850_x_at  | 0.00133 | 1.1870588  |
| SAR1A        | 201543_s_at | 0.00000252 | -1.2653377 | RSL24D1      | 222465_at    | 0.00134 | 1.1935772  |
| SLC6A2       | 217214_s_at | 0.00000252 | 2.6492902  | TXNIP        | 201010_s_at  | 0.00134 | 1.2696234  |

|              |              |            |            |           |              |         |            |
|--------------|--------------|------------|------------|-----------|--------------|---------|------------|
| LOC100289230 | 238456_at    | 0.00000252 | 1.4198529  | PABPC5    | 233136_at    | 0.00134 | 2.4726876  |
| GARNL3       | 223604_at    | 0.00000254 | 1.6667608  | MYO6      | 210480_s_at  | 0.00134 | -1.1381373 |
| BRWD1        | 231960_at    | 0.00000254 | 1.078079   | SLC7A11   | 217678_at    | 0.00135 | -1.763204  |
| UBE2F        | 225783_at    | 0.00000258 | -1.0375604 | CES4A     | 228903_at    | 0.00135 | 2.6958528  |
| HIST1H2AM    | 214481_at    | 0.00000258 | -2.263909  | SCP2      | 201339_s_at  | 0.00136 | -1.0750133 |
| VPS36        | 222478_at    | 0.00000261 | 1.0691737  | LOC285097 | 1556474_a_at | 0.00136 | 2.2940264  |
| ARMCX1       | 218694_at    | 0.00000262 | 2.4366433  | FAM46B    | 229518_at    | 0.00136 | -1.4616926 |
| YBX1         | 208627_s_at  | 0.00000262 | -2.0658629 | NR2F1-AS1 | 1556696_s_at | 0.00137 | 1.9915474  |
| LIPG         | 219181_at    | 0.00000267 | -2.9182181 | LUM       | 201744_s_at  | 0.00137 | 1.9723885  |
| MYO1B        | 212365_at    | 0.00000267 | -1.2979436 | MOB3B     | 229568_at    | 0.00137 | 1.3901198  |
| SNX21        | 1553960_at   | 0.00000272 | 1.1514171  | SLC12A2   | 225835_at    | 0.00137 | -1.4627969 |
| COL3A1       | 232458_at    | 0.00000272 | 2.7864876  | TRAPPC10  | 1555446_s_at | 0.00137 | -1.2003355 |
| PCF11        | 203378_at    | 0.00000272 | 1.0333731  | GCLC      | 202922_at    | 0.00138 | 1.224278   |
| CEBPG        | 225527_at    | 0.00000274 | -1.1590524 | TCF4      | 213891_s_at  | 0.00138 | 1.3689577  |
| TUBB3        | 202154_x_at  | 0.00000276 | -1.4131818 | PGAP1     | 241801_at    | 0.00139 | 1.5712172  |
| BBS9         | 37547_at     | 0.00000278 | 1.7310316  | L2HGDH    | 224459_at    | 0.00139 | -1.8575079 |
| GALNT2       | 217788_s_at  | 0.00000279 | -1.3820093 | S100A9    | 203535_at    | 0.00139 | -2.4251165 |
| HECTD2       | 227568_at    | 0.00000283 | 1.6247034  | EFEMP2    | 209356_x_at  | 0.00139 | 1.2382464  |
| CAMSAP2      | 212765_at    | 0.00000284 | 1.2022452  | EIF1      | 212225_at    | 0.00139 | 1.4639615  |
| PAN2         | 203117_s_at  | 0.00000285 | 1.4066524  | SLC35E1   | 222263_at    | 0.00139 | -1.1900263 |
| EIF2AK1      | 217736_s_at  | 0.00000286 | -1.198917  | MYO10     | 236718_at    | 0.0014  | -1.320491  |
| NAV1         | 224772_at    | 0.00000286 | -1.3401239 | TFPI      | 214378_at    | 0.0014  | 1.7007607  |
| DIDO1        | 213213_at    | 0.00000286 | 1.0773249  | CAMK2D    | 225019_at    | 0.0014  | 1.0598398  |
| TRIM45       | 219923_at    | 0.00000291 | 1.3390771  | HIPK2     | 219028_at    | 0.00141 | -1.093338  |
| USP51        | 237247_at    | 0.00000293 | 2.1918744  | PTPN12    | 216915_s_at  | 0.00141 | -1.7260078 |
| OLFM1        | 205591_at    | 0.00000293 | 2.8866989  | IGFBP6    | 203851_at    | 0.00141 | 1.2609782  |
| KLF3-AS1     | 1570414_x_at | 0.00000295 | 2.187243   | SNTB1     | 226438_at    | 0.00141 | -1.5781783 |

|          |              |            |            |           |              |         |            |
|----------|--------------|------------|------------|-----------|--------------|---------|------------|
| EIF3M    | 239848_at    | 0.00000295 | 1.5168366  | LOC440149 | 236366_at    | 0.00142 | 1.4540296  |
| PRKD1    | 205880_at    | 0.00000296 | 2.1468788  | SEMA5A    | 213169_at    | 0.00142 | 1.5026742  |
| AMMECR1  | 226421_at    | 0.00000297 | -1.5734687 | CD44      | 204490_s_at  | 0.00142 | -1.2910899 |
| GATAD1   | 214718_at    | 0.000003   | 1.1897858  | RAB3IP    | 231399_at    | 0.00143 | -1.1580195 |
| CBL      | 229010_at    | 0.00000302 | -1.5146055 | LMNA      | 1554600_s_at | 0.00143 | -1.3700289 |
| PCDH10   | 1556328_at   | 0.00000302 | 3.3005866  | IDUA      | 205059_s_at  | 0.00144 | 1.3651835  |
| CYP1B1   | 202437_s_at  | 0.00000305 | 2.389872   | COL16A1   | 204345_at    | 0.00144 | 1.3514135  |
| CANX     | 208853_s_at  | 0.00000306 | -1.2810101 | ADAMTS13  | 223844_at    | 0.00144 | 1.3259878  |
| NEURL1B  | 225355_at    | 0.00000307 | -1.3298868 | AAGAB     | 202852_s_at  | 0.00144 | -1.3674114 |
| RIT1     | 209882_at    | 0.0000031  | -1.7232027 | ZNF333    | 231369_at    | 0.00145 | 1.253269   |
| TTK      | 204822_at    | 0.00000311 | -2.1387359 | SEC62     | 1552789_at   | 0.00145 | 2.0544938  |
| ANLN     | 1552619_a_at | 0.00000312 | -2.255245  | LINC01139 | 235599_at    | 0.00145 | 2.8550316  |
| LRRN4CL  | 1556427_s_at | 0.00000313 | 1.9844691  | GRK6      | 211543_s_at  | 0.00145 | -1.3549412 |
| PFKP     | 201037_at    | 0.00000314 | -1.6419927 | HPCAL1    | 205462_s_at  | 0.00146 | -1.6969923 |
| ADAM33   | 232570_s_at  | 0.00000314 | 2.7977815  | FLJ34503  | 1553448_at   | 0.00146 | 1.7382378  |
| KIF18B   | 222039_at    | 0.00000316 | -1.9589964 | NPL       | 223405_at    | 0.00147 | -1.0497053 |
| FXYD1    | 205384_at    | 0.00000316 | 2.1489167  | ALG13     | 205584_at    | 0.00148 | 1.2567719  |
| BDH2     | 235155_at    | 0.00000319 | 1.5764759  | CCDC158   | 243875_at    | 0.00148 | 1.7267574  |
| STX6     | 1552618_at   | 0.00000319 | -1.3349396 | ERCC4     | 210158_at    | 0.00148 | -1.7287093 |
| MRPS25   | 224873_s_at  | 0.0000032  | 1.3919763  | FASN      | 212218_s_at  | 0.00148 | -1.0960733 |
| CPED1    | 228728_at    | 0.00000321 | 2.7260378  | DNAH3     | 1560803_at   | 0.00148 | -1.3122139 |
| LARP4    | 214155_s_at  | 0.00000327 | -1.0868336 | LCA5      | 229953_x_at  | 0.00149 | 1.6509154  |
| GALT     | 242734_x_at  | 0.00000336 | 2.1395685  | SCARNA17  | 240830_at    | 0.00149 | 1.3228475  |
| PLEKHH2  | 227148_at    | 0.00000336 | 2.454449   | CALU      | 214845_s_at  | 0.0015  | -1.2767236 |
| PMM1     | 203467_at    | 0.00000341 | 1.2692497  | ZBTB46    | 227329_at    | 0.0015  | 1.2628227  |
| PIK3R3   | 211580_s_at  | 0.00000342 | -2.0392759 | SPTBN1    | 200671_s_at  | 0.0015  | -1.7182152 |
| TMEM132C | 232313_at    | 0.00000346 | 3.5648427  | SVIL-AS1  | 228786_at    | 0.00151 | -1.1289576 |

|           |              |            |            |          |              |         |            |
|-----------|--------------|------------|------------|----------|--------------|---------|------------|
| NMT2      | 205006_s_at  | 0.00000346 | 1.4999534  | RBM48    | 221595_at    | 0.00152 | 1.2733132  |
| PIK3R3    | 202743_at    | 0.00000352 | -1.5616312 | CTSV     | 210074_at    | 0.00152 | -2.1920367 |
| TP53BP2   | 203120_at    | 0.00000353 | -1.2901964 | RIPPLY3  | 207267_s_at  | 0.00152 | -1.8600397 |
| ECM1      | 209365_s_at  | 0.00000354 | 1.6846913  | EFNB3    | 205031_at    | 0.00152 | 2.1684585  |
| BAX       | 208478_s_at  | 0.00000357 | -1.6374898 | LRP8     | 205282_at    | 0.00153 | -1.0041389 |
| RDH10     | 1552378_s_at | 0.00000357 | -2.5832883 | SLC16A10 | 219915_s_at  | 0.00153 | -1.3879316 |
| LINC00115 | 220399_at    | 0.00000357 | 1.21548    | KLF5     | 209212_s_at  | 0.00153 | -1.2856957 |
| DYNC2LI1  | 203763_at    | 0.00000362 | 1.0796703  | KCNE3    | 222923_s_at  | 0.00153 | -2.269569  |
| LMNA      | 203411_s_at  | 0.00000363 | -1.3190297 | LARP4    | 1555384_a_at | 0.00153 | -1.7570589 |
| RELT      | 227060_at    | 0.00000367 | -1.6464931 | CD44     | 1565868_at   | 0.00153 | -1.4305821 |
| GALNT2    | 217787_s_at  | 0.00000368 | -1.98399   | CCNE1    | 213523_at    | 0.00153 | -1.6266998 |
| SLC38A1   | 224579_at    | 0.00000368 | -2.0361148 | TRMT13   | 232489_at    | 0.00153 | 1.1942628  |
| SNORD77   | 224841_x_at  | 0.00000369 | 1.2832333  | TPT1-AS1 | 228913_at    | 0.00154 | 1.118423   |
| SENP6     | 214790_at    | 0.00000369 | 1.3935563  | RPP25    | 223415_at    | 0.00155 | -1.1042439 |
| PGAP1     | 213469_at    | 0.00000369 | 1.8842204  | ZNF626   | 235687_at    | 0.00155 | 2.2276206  |
| YWHAH     | 201020_at    | 0.0000037  | -1.220011  | CSTA     | 204971_at    | 0.00156 | -1.7326502 |
| UBE2H     | 221962_s_at  | 0.00000371 | -1.3796398 | LAPTM5   | 201721_s_at  | 0.00156 | -1.48966   |
| SLC25A27  | 230624_at    | 0.00000375 | 2.017373   | MME      | 203435_s_at  | 0.00156 | 2.3455961  |
| METTL10   | 226634_at    | 0.00000378 | 1.1199277  | ZNF546   | 240429_at    | 0.00156 | 1.2651807  |
| SRRM4     | 236151_at    | 0.00000383 | 2.1952184  | STYX     | 242408_at    | 0.00156 | -1.1368591 |
| RASGRP3   | 205801_s_at  | 0.00000387 | -2.1048987 | HNRNPL   | 202072_at    | 0.00156 | -1.4892197 |
| UQCC1     | 229672_at    | 0.0000039  | 1.4650743  | GLRB     | 244680_at    | 0.00157 | 1.2311756  |
| RUFY2     | 241996_at    | 0.0000039  | 1.7006038  | TEPP     | 240119_at    | 0.00157 | 1.5719232  |
| TMEM245   | 223007_s_at  | 0.00000398 | 1.1878389  | FAM184A  | 220150_s_at  | 0.00157 | 1.2375955  |
| UBE2H     | 222420_s_at  | 0.000004   | -1.2654777 | YKT6     | 217784_at    | 0.00158 | -1.5522672 |
| TSPAN17   | 225235_at    | 0.00000401 | -1.0887898 | ADAMTS5  | 219935_at    | 0.00159 | 1.4817311  |
| CDC25C    | 205167_s_at  | 0.00000408 | -2.4225975 | PTGS1    | 238669_at    | 0.00159 | 1.8755478  |

|             |              |            |            |              |              |         |            |
|-------------|--------------|------------|------------|--------------|--------------|---------|------------|
| ATP6V1D     | 208899_x_at  | 0.00000411 | -1.0751688 | AGPAT3       | 219723_x_at  | 0.00159 | -1.271369  |
| ACLY        | 210337_s_at  | 0.00000415 | -1.8597098 | KNL1         | 1552680_a_at | 0.00159 | -1.3959104 |
| EZR         | 208621_s_at  | 0.00000416 | -2.481467  | CXCL10       | 204533_at    | 0.0016  | -2.1586476 |
| MYNN        | 241730_at    | 0.00000418 | 1.3230657  | LINC00939    | 216209_at    | 0.0016  | 2.0560806  |
| PHACTR2     | 227947_at    | 0.00000418 | 1.0685254  | NME1         | 201577_at    | 0.0016  | -1.2010972 |
| RGL3        | 215054_at    | 0.00000423 | 1.8608213  | DPP7         | 238012_at    | 0.00161 | 1.1015734  |
| THBS1       | 239336_at    | 0.00000423 | 2.9701564  | ZMYND11      | 1554158_at   | 0.00163 | -1.4908172 |
| TRIM52-AS1  | 228664_at    | 0.00000423 | 1.8332079  | EDNRA        | 204464_s_at  | 0.00164 | 1.4426808  |
| LRFN5       | 230644_at    | 0.00000427 | 3.482685   | HOXD10       | 229400_at    | 0.00164 | 1.461519   |
| RBM14-RBM4  | 235511_at    | 0.00000437 | 1.3934115  | TMEM221      | 239128_at    | 0.00164 | 1.5360335  |
| LIMK1       | 204357_s_at  | 0.00000439 | -1.6910095 | RRP15        | 214764_at    | 0.00165 | 1.3555133  |
| SCAF4       | 226082_s_at  | 0.0000044  | -1.1910874 | CREBZF       | 202979_s_at  | 0.00165 | 1.1354553  |
| KIFC1       | 209680_s_at  | 0.00000441 | -1.6566587 | C19orf33     | 223631_s_at  | 0.00165 | 1.8976711  |
| ZCWPW1      | 223992_x_at  | 0.00000445 | 2.8275559  | CRB1         | 244403_at    | 0.00165 | 2.2011562  |
| RAMP1       | 204916_at    | 0.00000447 | 1.3740051  | UBE2V2       | 209096_at    | 0.00165 | -1.0193198 |
| ASPM        | 239002_at    | 0.00000448 | -2.1281418 | CDH2         | 203440_at    | 0.00166 | 2.6342486  |
| PRNP        | 201300_s_at  | 0.00000451 | 2.232479   | NRG2         | 206879_s_at  | 0.00166 | 1.3188145  |
| BEX1        | 218332_at    | 0.0000046  | 4.0211601  | SALL1        | 229273_at    | 0.00166 | 1.4314234  |
| SNED1       | 213488_at    | 0.00000461 | 1.720236   | TNS2         | 212494_at    | 0.00166 | 1.1776663  |
| MAN2C1      | 203668_at    | 0.00000463 | 1.1978006  | HBB          | 217232_x_at  | 0.00166 | 1.414345   |
| HNRNPU      | 200593_s_at  | 0.00000466 | -1.2782298 | ITGA9-AS1    | 1563635_at   | 0.00166 | 1.8550008  |
| ADAMTS9-AS2 | 233113_at    | 0.00000475 | 2.6054419  | SLAMF7       | 219159_s_at  | 0.00167 | -2.0860872 |
| COL4A1      | 211981_at    | 0.00000479 | -2.2015366 | DNAJC21      | 235001_at    | 0.00168 | -1.3018472 |
| KDM6B       | 1556067_a_at | 0.00000482 | -1.8688199 | NOS1         | 239132_at    | 0.00168 | 1.9703838  |
| ATP8A2      | 219659_at    | 0.00000483 | 2.8081431  | FAM69B       | 226940_at    | 0.00168 | 1.3436189  |
| ZNF548      | 1553719_s_at | 0.00000485 | 1.1965376  | ZBED3        | 235109_at    | 0.00169 | -1.0245026 |
| TRIP13      | 204033_at    | 0.00000485 | -1.6716227 | LOC100129518 | 221477_s_at  | 0.00169 | -1.4522595 |

|           |              |            |            |           |             |         |            |
|-----------|--------------|------------|------------|-----------|-------------|---------|------------|
| GNG7      | 228831_s_at  | 0.00000487 | 1.3759075  | KLF9      | 230636_s_at | 0.00169 | 1.5730989  |
| MUTYH     | 207727_s_at  | 0.00000491 | 1.2329239  | DUSP10    | 215501_s_at | 0.00169 | -1.1386497 |
| RBM24     | 235004_at    | 0.00000491 | 2.7921147  | BEND6     | 231175_at   | 0.00169 | 2.1041316  |
| SDC1      | 201286_at    | 0.00000499 | -1.7721965 | PRTFDC1   | 222803_at   | 0.00169 | 1.6487373  |
| RPS6KA5   | 204635_at    | 0.00000509 | 1.5620946  | RGS16     | 209324_s_at | 0.0017  | -1.5213959 |
| PATL1     | 235234_at    | 0.0000051  | -1.3478745 | ZNF441    | 1553192_at  | 0.0017  | 1.7492814  |
| HECTD2    | 238803_at    | 0.0000051  | 1.9028014  | OAS2      | 204972_at   | 0.0017  | -1.7627525 |
| MOB3B     | 226844_at    | 0.0000051  | 1.5051547  | CCL3L3    | 205114_s_at | 0.0017  | 1.3546895  |
| CNN1      | 203951_at    | 0.00000513 | 2.825615   | PLA2R1    | 235746_s_at | 0.00171 | 2.0614092  |
| RAB8B     | 226633_at    | 0.00000514 | 1.193482   | CRELD2    | 218358_at   | 0.00171 | -1.1290509 |
| ZBED8     | 220770_s_at  | 0.00000518 | 1.1323976  | SGSM2     | 217538_at   | 0.00171 | 1.1098412  |
| ESCO2     | 235178_x_at  | 0.00000519 | -2.7293665 | ATP6V0D1  | 212041_at   | 0.00172 | -1.1668011 |
| MAPRE1    | 200712_s_at  | 0.00000524 | -1.107733  | SSPN      | 204964_s_at | 0.00172 | 2.0625628  |
| LIN7B     | 241957_x_at  | 0.00000525 | 1.1372224  | ASAP3     | 222236_s_at | 0.00172 | 1.632304   |
| WNK1      | 211993_at    | 0.00000529 | -1.7065996 | TNNI3K    | 241858_at   | 0.00172 | 1.1803958  |
| EIF1AX    | 201018_at    | 0.00000533 | 1.6462397  | SLC2A1    | 201250_s_at | 0.00173 | -1.1920759 |
| SLC6A10PB | 215812_s_at  | 0.00000537 | -1.916969  | AK9       | 1552299_at  | 0.00173 | -1.4352645 |
| RPL31     | 200962_at    | 0.00000537 | 1.4550104  | MIR5193   | 1294_at     | 0.00173 | 1.0906792  |
| FBXO9     | 238472_at    | 0.00000539 | 1.2095366  | OASL      | 205660_at   | 0.00173 | -1.3714297 |
| LOC145474 | 230505_at    | 0.00000542 | -1.7050429 | LOC283454 | 229552_at   | 0.00175 | -1.9488226 |
| DNAJB4    | 203811_s_at  | 0.00000544 | -2.3825855 | LPP       | 202821_s_at | 0.00175 | -1.0650304 |
| STIL      | 205339_at    | 0.00000544 | -1.5062223 | ERICH1    | 1556766_at  | 0.00175 | -1.2877771 |
| PDZRN3    | 212915_at    | 0.00000544 | 2.7508932  | MEIS3     | 228327_x_at | 0.00176 | 1.4554056  |
| SNORD77   | 224741_x_at  | 0.00000546 | 1.2553766  | ABCF2     | 207623_at   | 0.00176 | 1.8966132  |
| CDC25A    | 1555772_a_at | 0.00000548 | -2.3236789 | ENC1      | 201341_at   | 0.00176 | -1.3413619 |
| LMNB1     | 203276_at    | 0.00000549 | -1.5914527 | LOX       | 204298_s_at | 0.00177 | -1.8844651 |
| TUBB4B    | 213726_x_at  | 0.00000549 | -1.3125449 | C7orf31   | 229146_at   | 0.00177 | 1.2435099  |

|          |              |            |            |                |              |         |            |
|----------|--------------|------------|------------|----------------|--------------|---------|------------|
| NUP50    | 218294_s_at  | 0.00000554 | -1.2551412 | RAP1GDS1       | 217457_s_at  | 0.00177 | -1.0102829 |
| ERO1A    | 222646_s_at  | 0.00000556 | -1.851471  | TMEM27         | 223784_at    | 0.00177 | 1.2560574  |
| MAT2A    | 200768_s_at  | 0.00000563 | 1.0555288  | C3orf33        | 1554176_a_at | 0.00177 | 1.3024923  |
| EFHD2    | 222483_at    | 0.00000575 | -1.1238565 | AP1M2          | 218261_at    | 0.00178 | -1.6099141 |
| STK4     | 211085_s_at  | 0.00000578 | -2.2875922 | CDCA3          | 221436_s_at  | 0.00178 | -1.331749  |
| TIPRL    | 1554351_a_at | 0.00000578 | -1.232494  | ZNF677         | 1560562_a_at | 0.00178 | 2.0325881  |
| YPEL3    | 232077_s_at  | 0.00000578 | 2.4023256  | MUC1           | 211695_x_at  | 0.00179 | -1.2338373 |
| DTL      | 218585_s_at  | 0.00000579 | -1.8851042 | GAS6           | 202177_at    | 0.00179 | 2.2683336  |
| EML4     | 223068_at    | 0.00000579 | -1.0099224 | P2RY1          | 207455_at    | 0.00179 | 1.2272423  |
| DFFB     | 206752_s_at  | 0.00000579 | 1.1124872  | AMN1           | 226258_at    | 0.00179 | 2.0268629  |
| SPAG5    | 203145_at    | 0.00000585 | -1.3546966 | SLC25A46       | 226831_at    | 0.00179 | 1.2371205  |
| ID2      | 201566_x_at  | 0.00000589 | 1.6142621  | SLAMF8         | 219385_at    | 0.0018  | -1.6021639 |
| KPNB1    | 208974_x_at  | 0.0000059  | -1.071567  | GBP5           | 229625_at    | 0.0018  | -1.5942017 |
| CDC6     | 203968_s_at  | 0.00000601 | -1.4053794 | CAPN13         | 234709_at    | 0.0018  | -3.3239078 |
| NUMA1    | 200747_s_at  | 0.00000603 | 1.221144   | NHSL1          | 226490_at    | 0.00181 | -1.1467181 |
| C11orf54 | 223268_at    | 0.00000603 | 1.0658687  | CHKA           | 204233_s_at  | 0.00181 | -1.005907  |
| EZH1     | 32259_at     | 0.00000606 | 1.0343987  | LOC283713      | 230783_at    | 0.00182 | 1.5565224  |
| IL1RN    | 212657_s_at  | 0.00000607 | -2.3565736 | KCNC4          | 235467_s_at  | 0.00182 | 1.5222232  |
| PCGF5    | 227935_s_at  | 0.00000607 | -1.2947765 | LGALS4         | 204272_at    | 0.00183 | 2.0980635  |
| TSPOAP1  | 205839_s_at  | 0.00000607 | 1.6017225  | AAGAB          | 202851_at    | 0.00184 | -1.5567749 |
| LPCAT2   | 227889_at    | 0.00000612 | 2.0123165  | TGIF2-C20orf24 | 224376_s_at  | 0.00184 | -1.0089867 |
| DCT      | 205337_at    | 0.00000613 | 3.1222345  | ADAM22         | 213411_at    | 0.00184 | 1.4562158  |
| MAPK13   | 210059_s_at  | 0.00000614 | -1.3157303 | DACH1          | 228915_at    | 0.00185 | 2.3896906  |
| JUNB     | 201473_at    | 0.00000614 | 1.5693711  | ZNF506         | 1568720_at   | 0.00185 | 1.4592303  |
| ELK4     | 214831_at    | 0.00000614 | -1.6769693 | CTC1           | 235523_at    | 0.00185 | 1.6261313  |
| NCBP2    | 201521_s_at  | 0.00000614 | -1.3761643 | CALML4         | 221879_at    | 0.00185 | -1.416657  |
| GOT1     | 208813_at    | 0.0000063  | -1.318428  | RUNX1T1        | 205529_s_at  | 0.00186 | 1.9279032  |

|              |              |            |            |             |              |         |            |
|--------------|--------------|------------|------------|-------------|--------------|---------|------------|
| TSPYL5       | 213122_at    | 0.0000063  | 2.1535298  | ARSD        | 223695_s_at  | 0.00186 | 1.0751253  |
| LYRM9        | 213195_at    | 0.00000633 | 1.2930123  | MGAT4A      | 219797_at    | 0.00186 | -1.4797646 |
| FLT1         | 226498_at    | 0.00000634 | -2.9513859 | IRS1        | 204686_at    | 0.00187 | 1.8216199  |
| AKIRIN1      | 222458_s_at  | 0.00000635 | -2.1607407 | SMIM10L2A   | 238697_at    | 0.00188 | 1.6564365  |
| NNT          | 202784_s_at  | 0.00000637 | -1.2763616 | SETBP1      | 227478_at    | 0.00188 | 1.1492538  |
| C3orf38      | 1569129_s_at | 0.00000642 | 1.1351124  | OIP5        | 213599_at    | 0.00188 | -1.8638054 |
| MALL         | 209373_at    | 0.00000643 | -2.8612934 | STARD10     | 238911_at    | 0.00188 | 1.2729497  |
| PRICKLE1     | 230708_at    | 0.0000065  | 2.3217008  | TTC3P1      | 1569472_s_at | 0.00189 | -1.9818985 |
| FOXL2        | 220102_at    | 0.00000652 | 2.1562951  | RNF150      | 236038_at    | 0.00191 | 1.9406835  |
| BLM          | 205733_at    | 0.00000653 | -1.1604692 | GBP5        | 238581_at    | 0.00191 | -2.1196857 |
| ZNF674-AS1   | 241972_at    | 0.00000656 | 1.4357219  | CHURC1-FNTB | 1773_at      | 0.00192 | -1.0268683 |
| PPIF         | 201490_s_at  | 0.00000656 | -2.4163682 | ACAD9       | 239976_at    | 0.00194 | 1.023278   |
| EGR1         | 201694_s_at  | 0.00000659 | 1.4920009  | HFE2        | 228621_at    | 0.00194 | -1.3643633 |
| ST14         | 216905_s_at  | 0.00000659 | -1.5716069 | DNAJC3      | 1558080_s_at | 0.00194 | -1.1979592 |
| ADAM9        | 1555326_a_at | 0.00000669 | -2.2444146 | UNC5B       | 213100_at    | 0.00194 | -1.2929341 |
| HMMR         | 207165_at    | 0.0000067  | -2.2205264 | PAK3        | 229201_at    | 0.00194 | 2.2384697  |
| LOC730268    | 230588_s_at  | 0.00000677 | 1.0676801  | MAT2A       | 200769_s_at  | 0.00195 | -1.0914926 |
| PTPRN2       | 203030_s_at  | 0.0000068  | 1.9384014  | ARFGEF2     | 215931_s_at  | 0.00195 | -1.5152157 |
| GIN54        | 211767_at    | 0.00000682 | -2.2318176 | TMEM55A     | 226338_at    | 0.00196 | 1.5414799  |
| C11orf31     | 1557801_x_at | 0.00000686 | 1.1260242  | GNG11       | 239942_at    | 0.00196 | 1.5350439  |
| S100A11      | 200660_at    | 0.00000686 | -1.6647077 | ZC3H12B     | 229234_at    | 0.00196 | 2.0273815  |
| ATG16L2      | 225883_at    | 0.00000687 | 1.7414995  | S100A8      | 202917_s_at  | 0.00196 | -3.1425969 |
| METTL2A      | 225253_s_at  | 0.00000693 | -1.3236655 | THY1        | 208850_s_at  | 0.00196 | -1.2066299 |
| TBX3         | 219682_s_at  | 0.00000699 | 2.0361342  | CCDC171     | 236945_at    | 0.00196 | 1.442989   |
| LOC100506558 | 202350_s_at  | 0.00000707 | 2.5553929  | BRCA1       | 204531_s_at  | 0.00197 | -1.0653412 |
| CENPT        | 218148_at    | 0.0000071  | 2.4584863  | WDR91       | 230888_at    | 0.00197 | 1.1023262  |
| ST8SIA1      | 1569788_at   | 0.0000071  | 2.6485999  | FOSL2       | 225262_at    | 0.00198 | -1.1034453 |

|            |             |            |            |              |              |         |            |
|------------|-------------|------------|------------|--------------|--------------|---------|------------|
| NUP54      | 218256_s_at | 0.0000071  | 1.0081385  | LOC101928238 | 1561595_x_at | 0.00199 | 1.6747304  |
| MCOLN3     | 229797_at   | 0.00000716 | 2.2644563  | LOC100506990 | 227917_at    | 0.002   | 1.1865441  |
| ZNF709     | 242028_at   | 0.00000716 | 1.1593935  | UACA         | 238868_at    | 0.002   | 1.1179163  |
| ETV6       | 205585_at   | 0.00000716 | -1.3195198 | RBPMS        | 207836_s_at  | 0.002   | 1.3711721  |
| PRKAG2-AS1 | 229157_at   | 0.00000721 | 2.2649827  | KIAA0895L    | 1558041_a_at | 0.00201 | 1.2691966  |
| PEX1       | 204873_at   | 0.00000726 | 1.1417243  | SNORA70      | 221989_at    | 0.00202 | 1.0591163  |
| LEF1-AS1   | 243363_at   | 0.00000728 | 2.4753028  | ATF1         | 222103_at    | 0.00203 | 1.0059831  |
| PCCB       | 212694_s_at | 0.00000736 | -1.6264765 | CCDC190      | 1554960_at   | 0.00203 | -1.9019714 |
| C4orf46    | 201812_s_at | 0.00000736 | 1.4740446  | NRXN1        | 228547_at    | 0.00203 | 1.6183477  |
| ABI3BP     | 223395_at   | 0.00000736 | 2.6561764  | KIAA1644     | 52837_at     | 0.00203 | 1.4522628  |
| TMEM136    | 238497_at   | 0.00000742 | 1.3384283  | CCNL2        | 222999_s_at  | 0.00203 | 1.0101251  |
| KCNH8      | 1552742_at  | 0.00000742 | 2.813586   | PAPPA        | 224941_at    | 0.00204 | 1.7087822  |
| NUSAP1     | 218039_at   | 0.00000744 | -1.9023607 | RAD1         | 228535_at    | 0.00204 | 1.0094352  |
| C8orf82    | 226710_at   | 0.0000075  | 1.2453485  | TUSC1        | 227388_at    | 0.00204 | 1.5768352  |
| ADM        | 202912_at   | 0.0000075  | -2.0550167 | SVIL         | 202566_s_at  | 0.00204 | -1.069245  |
| CYBB       | 203922_s_at | 0.00000751 | -1.7781015 | CLK4         | 241403_at    | 0.00204 | 1.1604658  |
| C11orf31   | 1557799_at  | 0.00000754 | 1.0575426  | SYT14        | 1553654_at   | 0.00205 | 2.1794583  |
| FAXDC2     | 48031_r_at  | 0.00000754 | 1.5621446  | ZNF783       | 1556224_a_at | 0.00206 | 1.3309202  |
| ADGRB2     | 204966_at   | 0.00000754 | -2.1637072 | UNC80        | 230220_at    | 0.00207 | 1.6203255  |
| NPL        | 221210_s_at | 0.0000076  | -2.0824462 | F2RL2        | 230147_at    | 0.00207 | -2.1925188 |
| EPPK1      | 232164_s_at | 0.0000077  | -2.4071259 | LINS1        | 1554455_at   | 0.00208 | 1.0049454  |
| CTBP1      | 203392_s_at | 0.00000775 | -1.0593727 | SPHK2        | 209857_s_at  | 0.00208 | -1.3821588 |
| RAB33B     | 221014_s_at | 0.00000776 | 1.1658816  | RNF180       | 236644_at    | 0.00209 | 1.9127782  |
| DCN        | 201893_x_at | 0.00000786 | 2.3522127  | GPC4         | 204983_s_at  | 0.00209 | -2.0148317 |
| SCAMP1     | 212425_at   | 0.00000786 | 1.180622   | DLG3         | 207732_s_at  | 0.00209 | -1.4048269 |
| SPSB3      | 221769_at   | 0.00000796 | 1.5584415  | DDX6         | 204909_at    | 0.00209 | -1.0383044 |
| SCARNA2    | 237137_at   | 0.00000796 | 2.3115212  | PYROXD2      | 228384_s_at  | 0.00209 | 1.1963777  |

|            |              |            |            |              |              |         |            |
|------------|--------------|------------|------------|--------------|--------------|---------|------------|
| TBC1D24    | 227908_at    | 0.00000799 | -1.1196312 | RBM15        | 1555761_x_at | 0.0021  | -1.1042292 |
| PID1       | 219093_at    | 0.0000081  | 2.8617978  | ZNF502       | 232247_at    | 0.0021  | 1.9421793  |
| KPNA3      | 221503_s_at  | 0.0000081  | -1.1699429 | FKBP4        | 200894_s_at  | 0.00213 | -1.1348213 |
| PSMD1      | 201198_s_at  | 0.00000814 | -1.5054123 | DPT          | 213071_at    | 0.00214 | 1.6107371  |
| FYB        | 211794_at    | 0.00000814 | -2.4127193 | VIPR2        | 205946_at    | 0.00214 | 1.5565354  |
| ENAH       | 217820_s_at  | 0.00000817 | -1.10767   | SUZ12        | 1566191_at   | 0.00214 | -1.5502589 |
| TUBB4B     | 208977_x_at  | 0.00000818 | -1.2737686 | KLF3         | 219657_s_at  | 0.00215 | -1.1297182 |
| PHYKPL     | 226783_at    | 0.00000819 | 1.3273068  | ADRA2C       | 206128_at    | 0.00215 | 1.4336213  |
| TUBB3      | 213476_x_at  | 0.00000826 | -1.3281687 | UNK          | 1562434_at   | 0.00215 | 1.1368933  |
| LOC283861  | 1554520_at   | 0.00000834 | 1.6588052  | ITM2A        | 202747_s_at  | 0.00215 | 1.2683904  |
| MIR29C     | 228528_at    | 0.00000841 | 2.1487018  | LOC102724562 | 213380_x_at  | 0.00216 | 1.4431159  |
| CECR2      | 223729_at    | 0.00000841 | 1.6946974  | THUMPD3-AS1  | 1557357_at   | 0.00216 | 1.0868655  |
| ATOH8      | 1558706_a_at | 0.00000842 | 2.2043612  | PLAG1        | 205372_at    | 0.00217 | 1.8290614  |
| SLC6A2     | 217213_at    | 0.00000842 | 2.8152851  | GLRA3        | 216021_s_at  | 0.00217 | -1.5136805 |
| PAX2       | 206228_at    | 0.00000842 | 4.5027399  | LINC00667    | 243426_at    | 0.00217 | 1.56895    |
| RRN3P1     | 215211_at    | 0.00000842 | 2.9879728  | PCDH17       | 228863_at    | 0.00217 | -1.4936253 |
| LOC728903  | 1555872_a_at | 0.00000861 | 1.6128485  | CXCL8        | 202859_x_at  | 0.00218 | -2.3645056 |
| PLCD1      | 205125_at    | 0.00000866 | 1.0926229  | CD163        | 203645_s_at  | 0.00218 | -1.5413066 |
| ZFP36L2    | 201368_at    | 0.00000866 | 1.7325318  | LOC101927043 | 1562604_at   | 0.00218 | 1.6540622  |
| THBS1      | 201110_s_at  | 0.00000866 | 2.2993184  | ZNF471       | 230578_at    | 0.00218 | 1.6868952  |
| FGF7P3     | 231031_at    | 0.00000869 | 2.2972539  | SIAH3        | 1560676_at   | 0.00218 | 2.3747504  |
| MRGPRF-AS1 | 1560496_at   | 0.00000869 | 1.6303798  | EIF5B        | 201026_at    | 0.00218 | -1.0247495 |
| ZFP36      | 201531_at    | 0.00000869 | 1.5632653  | TGIF1        | 203313_s_at  | 0.00219 | 1.0106078  |
| EZR        | 217234_s_at  | 0.00000869 | -2.1626566 | SEPT7-AS1    | 230450_at    | 0.00219 | 1.0759859  |
| G2E3       | 223257_at    | 0.00000878 | 1.1244605  | LINC00957    | 1564208_x_at | 0.00219 | 1.9561855  |
| SSPN       | 226932_at    | 0.0000088  | 2.3083245  | LINC00092    | 1562733_at   | 0.0022  | 1.0743111  |
| CAST       | 207467_x_at  | 0.00000884 | -1.0560774 | SNED1        | 213493_at    | 0.0022  | 1.9241967  |

|          |              |            |            |              |              |         |            |
|----------|--------------|------------|------------|--------------|--------------|---------|------------|
| KIAA1217 | 231807_at    | 0.00000891 | 1.263647   | PRMT2        | 228725_x_at  | 0.0022  | -1.087297  |
| ZNF540   | 238454_at    | 0.00000898 | 2.5802117  | LOC100996419 | 1559534_at   | 0.0022  | 1.305921   |
| KDM6B    | 1556066_at   | 0.00000898 | -1.9598874 | SPIN3        | 1554099_a_at | 0.0022  | 1.0638711  |
| KIF26A   | 234307_s_at  | 0.00000898 | 2.3190099  | FOXN4        | 241009_at    | 0.00221 | -1.4874046 |
| RBP7     | 238066_at    | 0.00000902 | 2.4302015  | KCNS3        | 205968_at    | 0.00223 | 1.2685034  |
| TUBB     | 209026_x_at  | 0.00000902 | -1.6242824 | ATG4C        | 228190_at    | 0.00223 | 1.1621907  |
| HMMR     | 209709_s_at  | 0.00000905 | -2.1446149 | LOC100996255 | 234423_x_at  | 0.00223 | 1.2583961  |
| NUSAP1   | 219978_s_at  | 0.00000906 | -1.7816157 | FLII         | 212025_s_at  | 0.00224 | -1.5099105 |
| C12orf66 | 1554067_at   | 0.00000907 | 1.2865033  | C8orf88      | 228107_at    | 0.00225 | 1.528019   |
| NR3C1    | 216321_s_at  | 0.00000908 | 1.850732   | CAMKMT       | 1554875_at   | 0.00226 | -1.8509751 |
| AASS     | 214829_at    | 0.00000915 | 1.9751884  | COX2         | 1553569_at   | 0.00226 | -1.1036788 |
| LUC7L3   | 241792_x_at  | 0.00000924 | 1.5448562  | OSBP2        | 223432_at    | 0.00226 | -1.2087743 |
| EGR3     | 206115_at    | 0.00000924 | 1.911103   | PAMR1        | 213661_at    | 0.00226 | 2.1404279  |
| MIA3     | 1569057_s_at | 0.00000924 | -1.3221917 | SEH1L        | 223225_s_at  | 0.00227 | -1.1430804 |
| SAV1     | 222573_s_at  | 0.00000926 | -1.0769703 | KIF26A       | 232069_at    | 0.00228 | 1.6677033  |
| HLF      | 204755_x_at  | 0.0000094  | 2.6642741  | SAA2-SAA4    | 207096_at    | 0.00228 | -1.7793217 |
| PAPPA    | 228128_x_at  | 0.00000945 | 3.1290961  | ABCC3        | 230682_x_at  | 0.00228 | 1.9242627  |
| GMDS     | 204875_s_at  | 0.00000949 | -2.2310061 | ZNF710       | 239700_at    | 0.00228 | -1.3257072 |
| RPP30    | 1556063_s_at | 0.00000949 | 1.5562874  | LRRIQ1       | 223817_at    | 0.00228 | -1.580525  |
| ABCC5    | 226363_at    | 0.00000949 | 1.2333272  | DAB1         | 228329_at    | 0.00229 | 1.6309882  |
| MITF     | 226066_at    | 0.00000957 | 1.468844   | LOH12CR2     | 236311_at    | 0.0023  | 1.3710941  |
| HM13     | 224615_x_at  | 0.00000957 | -1.1479608 | TRIM14       | 203147_s_at  | 0.0023  | -1.2162904 |
| C21orf59 | 218123_at    | 0.00000957 | -1.1823354 | PCDHB7       | 231738_at    | 0.0023  | 1.3908742  |
| NUDT6    | 230329_s_at  | 0.00000961 | 1.0495643  | SNORD73A     | 200099_s_at  | 0.00231 | 1.1456793  |
| TSPAN31  | 203227_s_at  | 0.00000973 | 1.5496003  | ENPEP        | 204844_at    | 0.00231 | 1.6027551  |
| MUT      | 202959_at    | 0.00000974 | 1.152867   | PTPN22       | 206060_s_at  | 0.00232 | -1.7513103 |
| YIPF5    | 224953_at    | 0.00000974 | 1.4274054  | FUT8         | 1554930_a_at | 0.00232 | -1.2417839 |

|          |                                |            |            |              |              |         |            |
|----------|--------------------------------|------------|------------|--------------|--------------|---------|------------|
| GLIPR1   | 226136_at                      | 0.00000976 | 1.4301994  | CHST15       | 244874_at    | 0.00232 | -1.5896956 |
| WASIR2   | 1568838_at                     | 0.0000099  | 2.5863768  | SLC26A4      | 206529_x_at  | 0.00232 | 1.6681747  |
| CYB561D2 | 229636_at                      | 0.0000099  | 2.2721989  | TNFAIP6      | 206026_s_at  | 0.00232 | -1.372636  |
| MICA     | 205904_at                      | 0.00000992 | 1.8654063  | ITGA1        | 214660_at    | 0.00232 | -1.4501694 |
| LETMD1   | 207170_s_at                    | 0.00000993 | 1.0133255  | PDE5A        | 227088_at    | 0.00232 | 1.6668272  |
| HILPDA   | 1554452_a_at                   | 0.00000995 | -2.0679703 | KCNMA1       | 221584_s_at  | 0.00232 | 1.828664   |
| MAN2B1   | 209166_s_at                    | 0.00000995 | -1.0585006 | RFX7         | 218430_s_at  | 0.00233 | -1.0094091 |
| ASPA     | 206030_at                      | 0.00001    | 2.7182641  | ZNF711       | 228988_at    | 0.00233 | 1.8218376  |
| C21orf2  | 203994_s_at                    | 0.0000101  | 2.3519814  | IWS1         | 1562110_at   | 0.00233 | -2.6733307 |
| NDN      | 209550_at                      | 0.0000102  | 2.0114087  | GANC         | 235340_at    | 0.00233 | -1.1000477 |
| DEPDC1   | 220295_x_at                    | 0.0000103  | -1.6807101 | TRMT1L       | 220992_s_at  | 0.00234 | 1.0428831  |
| BRCC3    | 216521_s_at                    | 0.0000103  | -2.0422063 | CELF1        | 1555467_a_at | 0.00234 | -1.561232  |
| ALDH18A1 | 217791_s_at                    | 0.0000103  | -1.36089   | ZNF439       | 236562_at    | 0.00235 | 1.3566506  |
| TDO2     | 205943_at                      | 0.0000103  | -2.0305697 | SFTPD        | 214199_at    | 0.00235 | 1.5406082  |
| CARMN    | 231987_at                      | 0.0000104  | 1.3685831  | LACTB        | 1552485_at   | 0.00236 | -1.4648172 |
|          | AFFX-                          |            |            |              |              |         |            |
| STAT1    | HUMISGF3A/<br>M97935_MB_<br>at | 0.0000104  | -1.9003361 | CDC45        | 204126_s_at  | 0.00236 | -1.9671108 |
| MPZL1    | 210087_s_at                    | 0.0000105  | -1.8727296 | RUNX1T1      | 205528_s_at  | 0.00236 | 1.4368248  |
| EPM2AIP1 | 236314_at                      | 0.0000105  | 2.6609557  | LOC102724250 | 230712_at    | 0.00237 | 1.1095733  |
| CENPW    | 226936_at                      | 0.0000105  | -1.5312285 | ABTB1        | 229164_s_at  | 0.00237 | 1.2394204  |
| NAA15    | 219158_s_at                    | 0.0000105  | -1.266973  | SAMHD1       | 1559883_s_at | 0.00237 | -2.1235585 |
| SAA2     | 214456_x_at                    | 0.0000106  | -3.74062   | CCNG2        | 211559_s_at  | 0.00237 | -1.2997333 |
| DIAPH3   | 229097_at                      | 0.0000108  | -1.612675  | NDUFV2-AS1   | 242676_at    | 0.00237 | 1.1119093  |
| CEP70    | 238154_at                      | 0.0000108  | 1.2941651  | SPP1         | 1568574_x_at | 0.00238 | -2.1907977 |
| TMEM106B | 226529_at                      | 0.0000109  | 1.4089895  | ACBD3        | 202323_s_at  | 0.00238 | -1.1524923 |

|              |              |           |            |            |              |         |            |
|--------------|--------------|-----------|------------|------------|--------------|---------|------------|
| RBM34        | 214942_at    | 0.0000109 | -1.8642108 | ZNF790-AS1 | 235779_at    | 0.00239 | 2.0003384  |
| KDM2A        | 208987_s_at  | 0.0000109 | -1.215965  | GPR22      | 244493_at    | 0.00239 | 2.1824428  |
| BTG2         | 201236_s_at  | 0.0000109 | 1.4558158  | KHDC1      | 230055_at    | 0.00239 | 1.7228576  |
| LOC101928269 | 211180_x_at  | 0.0000109 | -1.7349949 | DNAJC5     | 224613_s_at  | 0.0024  | -1.1920033 |
| LOC101928635 | 207016_s_at  | 0.000011  | 2.9865279  | KIAA1755   | 1561394_s_at | 0.0024  | 2.0434242  |
| MAGI2        | 209737_at    | 0.000011  | 1.5257567  | CKMT1A     | 202712_s_at  | 0.00241 | -1.4038503 |
| NAV1         | 224774_s_at  | 0.0000111 | -1.7031082 | TMEM56     | 237515_at    | 0.00242 | 1.1916045  |
| ZC3H6        | 227809_at    | 0.0000111 | 1.2005286  | INPP5D     | 203332_s_at  | 0.00242 | -1.3467097 |
| PLAA         | 209533_s_at  | 0.0000112 | -1.0073873 | ACCS       | 228264_at    | 0.00245 | 1.2631197  |
| PLOD2        | 202619_s_at  | 0.0000112 | -1.6318408 | PWAR6      | 226591_at    | 0.00246 | 1.5157284  |
| PPM1G        | 200913_at    | 0.0000113 | -1.1022624 | KRT7       | 1558394_s_at | 0.00246 | 1.7680279  |
| TAGLN2       | 200916_at    | 0.0000113 | -1.5843532 | ACACB      | 43427_at     | 0.00246 | 1.2234284  |
| GPI          | 208308_s_at  | 0.0000113 | -1.709479  | TPM4       | 1567107_s_at | 0.00247 | -1.8745187 |
| PPP2R5C      | 213305_s_at  | 0.0000113 | -1.0064816 | S100A2     | 204268_at    | 0.00247 | -2.1133161 |
| NCAPH        | 212949_at    | 0.0000115 | -2.2646689 | TMEM200A   | 234994_at    | 0.00247 | 1.7898887  |
| RBM7         | 235045_at    | 0.0000116 | 1.0500752  | DPY19L2    | 230158_at    | 0.00248 | 2.4873394  |
| CLCC1        | 1555543_a_at | 0.0000116 | -2.0782205 | PDK4       | 225207_at    | 0.00248 | 1.3074948  |
| PTCH1        | 209815_at    | 0.0000116 | 1.7354258  | ZC3H12C    | 231899_at    | 0.00249 | 1.6191048  |
| ANXA2        | 213503_x_at  | 0.0000116 | -1.3834516 | WDFY3-AS2  | 1562953_s_at | 0.00249 | 1.1847971  |
| MTFR2        | 228069_at    | 0.0000117 | -1.6889697 | BORCS5     | 227723_at    | 0.0025  | -1.1785591 |
| TXNL1        | 235561_at    | 0.0000117 | 1.7341055  | ARL5B      | 242727_at    | 0.0025  | -1.0258423 |
| NFATC4       | 236270_at    | 0.0000117 | 1.642686   | ERI2       | 240604_at    | 0.0025  | -1.4460708 |
| GULP1        | 204237_at    | 0.0000117 | 1.9429566  | CTHRC1     | 225681_at    | 0.0025  | -1.779066  |
| SLC36A1      | 213119_at    | 0.0000118 | -1.2092844 | KRT25      | 237905_at    | 0.00251 | -1.1627295 |
| SLC6A2       | 216610_at    | 0.0000118 | 2.3085556  | ZNF571-AS1 | 229328_at    | 0.00253 | 2.1943478  |
| BHLHE22      | 228636_at    | 0.0000119 | -2.6624087 | XIST       | 235446_at    | 0.00253 | 1.0864838  |
| RCBTB2       | 204759_at    | 0.0000119 | 1.6199856  | BPNT1      | 1554575_a_at | 0.00254 | -1.2480713 |

|              |              |           |            |              |             |         |            |
|--------------|--------------|-----------|------------|--------------|-------------|---------|------------|
| IGF2R        | 201393_s_at  | 0.0000119 | -1.5015424 | MCCC2        | 209623_at   | 0.00255 | -1.1081143 |
| EXO1         | 204603_at    | 0.0000119 | -2.1358165 | GDPD3        | 219722_s_at | 0.00255 | 1.0517605  |
| PKIB         | 231120_x_at  | 0.0000119 | 2.7699082  | ALDH1A3      | 1558649_at  | 0.00255 | 1.6824529  |
| NAP1L3       | 204749_at    | 0.000012  | 2.5900712  | ERRFI1       | 224657_at   | 0.00255 | 1.0749865  |
| STC2         | 203439_s_at  | 0.0000121 | -1.886839  | RDH5         | 236291_at   | 0.00256 | 1.2471472  |
| ADIRF        | 203571_s_at  | 0.0000122 | 2.3793497  | ADAMTSL4     | 226071_at   | 0.00257 | 1.2962326  |
| ZNF93        | 1569241_a_at | 0.0000122 | -2.2116556 | ANP32A-IT1   | 220710_at   | 0.00258 | -1.6394304 |
| TPTE2P5      | 240409_at    | 0.0000123 | 2.0927125  | IL18         | 206295_at   | 0.00258 | -1.3377983 |
| ANXA2        | 201590_x_at  | 0.0000123 | -1.463376  | RNF207       | 242882_at   | 0.00259 | 1.5496835  |
| TAF9B        | 226037_s_at  | 0.0000123 | 1.4062711  | LOC101928910 | 1570396_at  | 0.00259 | 1.7236031  |
| GART         | 212379_at    | 0.0000125 | -1.1151944 | CXCR2        | 207008_at   | 0.00259 | -1.7088767 |
| TPTE2P5      | 236770_at    | 0.0000125 | 2.5104571  | DDX3X        | 201211_s_at | 0.0026  | -1.4832649 |
| ATP8A2       | 231395_at    | 0.0000126 | 2.2849416  | DNM3OS       | 235891_at   | 0.0026  | 1.8827344  |
| GRK3         | 228771_at    | 0.0000127 | 1.8111415  | MIR100HG     | 225381_at   | 0.00261 | 2.1404723  |
| CDK1         | 210559_s_at  | 0.0000128 | -1.912812  | LOC100505570 | 242841_at   | 0.00261 | -1.1983992 |
| SNX21        | 1553961_s_at | 0.0000128 | 1.1102272  | EPPIN-WFDC6  | 206319_s_at | 0.00261 | 1.852821   |
| ID4          | 209291_at    | 0.0000129 | 2.0828074  | ANKRD44      | 226641_at   | 0.00261 | 1.0425274  |
| SOX4         | 201418_s_at  | 0.0000129 | -1.1106455 | RNASEH1      | 241343_at   | 0.00261 | -1.4369349 |
| ZDHHC21      | 229923_at    | 0.0000129 | 1.3270653  | RNF145       | 226077_at   | 0.00262 | -1.1051011 |
| FGD6         | 219901_at    | 0.000013  | -1.2128    | CMYA5        | 233520_s_at | 0.00262 | 1.170302   |
| RECK         | 205407_at    | 0.000013  | 1.9883307  | HIST1H3G     | 208496_x_at | 0.00262 | -1.3531034 |
| LOC100996412 | 230292_at    | 0.000013  | 1.7630576  | LOC285957    | 243601_at   | 0.00263 | -1.7279575 |
| ARPC3        | 208736_at    | 0.0000132 | -1.203294  | RPL11        | 200010_at   | 0.00264 | 1.3205733  |
| UBAP1L       | 232663_s_at  | 0.0000134 | 1.4597385  | LINC00271    | 1561106_at  | 0.00264 | 1.4251383  |
| FHL1         | 201540_at    | 0.0000135 | 2.2274072  | SERP2        | 239890_s_at | 0.00265 | 1.5504117  |
| EFS          | 204400_at    | 0.0000136 | 2.3303554  | FBXO15       | 231472_at   | 0.00265 | 1.6731251  |
| FAM188A      | 218297_at    | 0.0000137 | 1.2564402  | LYPD1        | 212909_at   | 0.00265 | -2.4698682 |

|             |              |           |            |              |              |         |            |
|-------------|--------------|-----------|------------|--------------|--------------|---------|------------|
| ASMTL       | 36553_at     | 0.0000138 | 1.0077027  | RIF1         | 241820_at    | 0.00265 | -1.0365827 |
| NCAPG2      | 219588_s_at  | 0.0000139 | -1.4743182 | DCAF12L1     | 238205_at    | 0.00266 | 2.3489133  |
| MOB1A       | 201298_s_at  | 0.0000139 | -1.3248182 | CCDC160      | 1563022_at   | 0.00267 | -2.2309107 |
| KCNIP4      | 236783_at    | 0.0000142 | 2.4972935  | PSMC3        | 201267_s_at  | 0.00267 | -1.4191082 |
| STAM2       | 228254_at    | 0.0000143 | 1.1592721  | SAMHD1       | 204502_at    | 0.00268 | -1.0568381 |
| HLF         | 204754_at    | 0.0000143 | 1.7620921  | LOC101927609 | 239775_at    | 0.00268 | 1.1081472  |
| TRIM45      | 242056_at    | 0.0000144 | 1.2351356  | PRICKLE2     | 225968_at    | 0.00268 | 1.1649229  |
| C1orf21     | 237098_at    | 0.0000145 | 1.741171   | PPP5C        | 201979_s_at  | 0.00268 | -1.3497221 |
| MARVELD3    | 239350_at    | 0.0000146 | -1.8356112 | DENND1B      | 228032_s_at  | 0.00268 | 1.0189157  |
| UBE2QL1     | 226612_at    | 0.0000146 | 2.0401581  | SPTAN1       | 214925_s_at  | 0.00268 | 1.1917774  |
| TRAM1       | 201399_s_at  | 0.0000147 | -1.4024187 | TAPT1        | 238798_at    | 0.00268 | 1.2661974  |
| PER3        | 221045_s_at  | 0.0000147 | 1.8110883  | GNAO1        | 204763_s_at  | 0.00269 | 1.7838464  |
| COL6A6      | 230867_at    | 0.0000148 | 2.917513   | METTL9       | 230395_at    | 0.00269 | -1.2186258 |
| DNAJC11     | 1555360_a_at | 0.0000148 | -1.3920726 | SNX14        | 230759_at    | 0.0027  | 1.1687871  |
| TTYH2       | 223741_s_at  | 0.0000149 | 1.8885674  | GUCA1B       | 235528_at    | 0.0027  | 1.0110134  |
| TRIM23      | 204732_s_at  | 0.0000151 | 1.0868008  | DET1         | 1558348_at   | 0.00271 | 1.0478148  |
| AURKA       | 208079_s_at  | 0.0000151 | -1.797184  | EPOR         | 209963_s_at  | 0.00271 | 1.3085516  |
| SBK1        | 226548_at    | 0.0000152 | -1.7429753 | STIP1        | 213330_s_at  | 0.00271 | -1.0972241 |
| MYLIP       | 223130_s_at  | 0.0000152 | 1.226199   | ASXL3        | 233536_at    | 0.00271 | 1.9603312  |
| ZBTB38      | 225512_at    | 0.0000152 | 1.1428633  | OSR1         | 228399_at    | 0.00271 | 1.7992812  |
| NR2C1       | 229956_at    | 0.0000154 | 1.2684142  | ZNF790-AS1   | 1558809_s_at | 0.00271 | 1.6047267  |
| RANGAP1     | 212125_at    | 0.0000154 | -2.0380701 | SEC14L1P1    | 217667_at    | 0.00271 | 2.2491558  |
| ANKRD22     | 238439_at    | 0.0000154 | -2.4206941 | GYG2         | 215695_s_at  | 0.00271 | -1.3606301 |
| CACNA1G     | 207869_s_at  | 0.0000155 | 2.8505649  | NUDT12       | 223535_at    | 0.00272 | 1.0959231  |
| MINOS1-NBL1 | 37005_at     | 0.0000155 | 1.5920702  | KLK11        | 205470_s_at  | 0.00272 | 1.9485066  |
| BIRC5       | 210334_x_at  | 0.0000155 | -1.7915321 | MYRIP        | 214156_at    | 0.00272 | 1.9328106  |
| PEG3        | 209243_s_at  | 0.0000157 | 3.1454713  | ANKRD12      | 216550_x_at  | 0.00272 | 1.2024788  |

|           |              |           |            |         |              |         |            |
|-----------|--------------|-----------|------------|---------|--------------|---------|------------|
| GARS      | 208693_s_at  | 0.0000157 | -1.2041841 | CYP39A1 | 244407_at    | 0.00273 | 1.266631   |
| SEC63     | 201914_s_at  | 0.0000157 | -1.1140873 | ALYREF  | 226319_s_at  | 0.00273 | -1.385586  |
| SPIRE1    | 1554807_a_at | 0.0000159 | -2.839658  | STK32B  | 219686_at    | 0.00273 | 2.2859361  |
| MGST2     | 204168_at    | 0.0000159 | -1.0863181 | ACTR2   | 1558015_s_at | 0.00273 | -1.0521849 |
| PSMA3-AS1 | 225724_at    | 0.0000159 | 1.0705824  | SLAIN2  | 233874_at    | 0.00273 | 1.2881228  |
| HEATR3    | 219289_at    | 0.000016  | -1.0555097 | D2HGDH  | 228738_at    | 0.00274 | 1.1554913  |
| INTS6-AS1 | 1557118_a_at | 0.000016  | 1.5945735  | ZNF614  | 210599_at    | 0.00274 | 1.2460908  |
| CBWD7     | 229804_x_at  | 0.0000161 | 1.0104654  | FGF13   | 205110_s_at  | 0.00274 | 1.9271979  |
| NAP1L1    | 1556121_at   | 0.0000162 | 1.0427271  | FNDC3A  | 215910_s_at  | 0.00274 | -1.5280985 |
| PES1      | 236434_at    | 0.0000162 | 1.6968701  | LAMA2   | 216840_s_at  | 0.00274 | 2.2453043  |
| LEF1-AS1  | 243362_s_at  | 0.0000162 | 2.9019238  | PFDN5   | 210908_s_at  | 0.00275 | 1.0793701  |
| SMAD4     | 202526_at    | 0.0000167 | 1.2119119  | SLC16A6 | 230748_at    | 0.00275 | 1.0601179  |
| C4orf3    | 224604_at    | 0.0000167 | 1.6522129  | SAFB    | 201747_s_at  | 0.00277 | -1.7017793 |
| EGR1      | 227404_s_at  | 0.0000167 | 1.7214348  | CXCL13  | 205242_at    | 0.00277 | -2.7897132 |
| SMOC2     | 223235_s_at  | 0.0000167 | 2.5612647  | CEP83   | 239282_at    | 0.00277 | 1.2673199  |
| STXBP5    | 235227_at    | 0.0000167 | 1.2887595  | HTR7P1  | 236115_at    | 0.00278 | 1.0553015  |
| SLC38A10  | 230448_at    | 0.0000168 | -1.4576847 | SLC30A7 | 239596_at    | 0.00278 | -1.0003644 |
| SBNO1     | 218737_at    | 0.0000168 | -1.0735729 | GK      | 215977_x_at  | 0.0028  | -1.3339252 |
| PTGR2     | 230774_at    | 0.0000168 | 1.0247371  | HECTD1  | 241955_at    | 0.0028  | -1.051092  |
| LINC01355 | 228387_at    | 0.0000169 | 1.6663758  | RIOK3   | 202129_s_at  | 0.0028  | -1.4932193 |
| ANXA2     | 210427_x_at  | 0.0000169 | -1.4648724 | POU6F1  | 229809_at    | 0.0028  | 1.3836153  |
| ZAK       | 225665_at    | 0.0000169 | 1.5556229  | RDH13   | 1559190_s_at | 0.00281 | 1.0537176  |
| MTMR10    | 225810_at    | 0.0000169 | 1.0722353  | STC2    | 203438_at    | 0.00282 | -1.461696  |
| BCHE      | 205433_at    | 0.000017  | 3.3908889  | TXLNG   | 219969_at    | 0.00282 | -1.2346    |
| RASGRF2   | 228109_at    | 0.000017  | 1.5249851  | SLC25A2 | 224166_at    | 0.00282 | -1.0039061 |
| AKIRIN1   | 217893_s_at  | 0.0000173 | -1.5626077 | MAGT1   | 210596_at    | 0.00283 | 1.3809787  |
| NAT6      | 210874_s_at  | 0.0000173 | 1.8235278  | SGO2    | 230165_at    | 0.00284 | -1.0319328 |

|              |              |           |            |              |              |         |            |
|--------------|--------------|-----------|------------|--------------|--------------|---------|------------|
| SIX4         | 229796_at    | 0.0000174 | -1.2013069 | SNHG18       | 227655_at    | 0.00285 | 1.7231151  |
| COL14A1      | 228750_at    | 0.0000175 | 1.8904345  | TTC14        | 241863_x_at  | 0.00287 | 1.3271763  |
| CARMN        | 227183_at    | 0.0000177 | 2.1841813  | UBE2S        | 202779_s_at  | 0.00287 | -1.5648272 |
| TNKS2        | 222563_s_at  | 0.0000177 | -1.6174056 | LSM4         | 202736_s_at  | 0.00287 | -1.3170669 |
| CAMSAP1      | 212712_at    | 0.0000179 | -1.1691249 | LINC00261    | 228004_at    | 0.00287 | 2.9231292  |
| CLUHP3       | 219442_at    | 0.0000179 | 1.3233186  | PBRM1        | 224152_s_at  | 0.00289 | -1.355116  |
| LOC101927263 | 236396_at    | 0.000018  | 2.3471256  | ST7-AS1      | 1555912_at   | 0.0029  | 1.1165025  |
| PTPRN2       | 203029_s_at  | 0.000018  | 2.5744299  | LOC283887    | 1556709_a_at | 0.0029  | 1.3571368  |
| ARPC5        | 1555797_a_at | 0.000018  | -1.2413364 | C1GALT1      | 219439_at    | 0.00291 | -1.1418131 |
| PABPC4L      | 238865_at    | 0.000018  | 2.7305164  | CD44         | 217523_at    | 0.00291 | -1.8323111 |
| ITGA2B       | 206493_at    | 0.0000182 | 2.0152703  | ACAP1        | 242081_at    | 0.00293 | 1.2618473  |
| MBLAC2       | 230298_at    | 0.0000183 | 1.0405931  | PAK1         | 209615_s_at  | 0.00293 | -1.0457917 |
| FMOD         | 202709_at    | 0.0000183 | 2.0561578  | ZNF446       | 219900_s_at  | 0.00293 | 1.0460251  |
| ACSL3        | 201662_s_at  | 0.0000185 | -1.2720562 | LOC100287525 | 230606_at    | 0.00294 | 1.1751867  |
| FLJ35934     | 1564383_s_at | 0.0000185 | 2.4557002  | CD93         | 202878_s_at  | 0.00294 | -1.0676121 |
| WDR17        | 1557132_at   | 0.0000185 | 2.8490348  | MESP2        | 1556014_at   | 0.00294 | -1.5743496 |
| ARNTL2       | 220658_s_at  | 0.0000186 | -2.758321  | CD86         | 210895_s_at  | 0.00294 | -1.5712692 |
| ZBTB14       | 208199_s_at  | 0.0000187 | -1.2272496 | GSTA1        | 203924_at    | 0.00294 | -2.0281285 |
| RASD1        | 223467_at    | 0.0000188 | 2.5299023  | FAHD2A       | 235621_at    | 0.00294 | 1.1419826  |
| MYBL2        | 201710_at    | 0.0000189 | -2.4119507 | ST6GAL2      | 228821_at    | 0.00295 | 2.2544306  |
| AQR          | 212583_at    | 0.0000189 | 1.0166972  | FANCI        | 213007_at    | 0.00295 | -1.033183  |
| TMEM19       | 230676_s_at  | 0.0000191 | -1.2203657 | SCD          | 211162_x_at  | 0.00298 | -1.4609451 |
| MIR6787      | 202856_s_at  | 0.0000195 | -1.7203838 | DLC1         | 242631_x_at  | 0.00298 | 1.5661299  |
| SH3GLB1      | 210101_x_at  | 0.0000198 | -1.3131151 | SOX2         | 228038_at    | 0.00298 | -2.4687912 |
| LOC102724851 | 230187_s_at  | 0.0000199 | 1.8972468  | NFYA         | 204107_at    | 0.00299 | -1.353905  |
| CKS2         | 204170_s_at  | 0.0000199 | -1.610388  | SATB1        | 241365_at    | 0.003   | 2.4037402  |
| LUC7L3       | 220044_x_at  | 0.00002   | 1.0327802  | LOC100130285 | 1562799_at   | 0.003   | 1.4835179  |

|              |                          |           |            |              |              |         |            |
|--------------|--------------------------|-----------|------------|--------------|--------------|---------|------------|
| IRGQ         | 1555833_a_at             | 0.00002   | -1.154617  | EPHB6        | 204718_at    | 0.003   | 1.1326084  |
| MSX2         | 210319_x_at              | 0.00002   | 3.465834   | HSP90B1      | 216449_x_at  | 0.00301 | -1.7304703 |
| FZD10-AS1    | 239569_at                | 0.0000201 | 2.4952241  | HYMAI        | 215513_at    | 0.00301 | 1.4373964  |
|              | AFFX-                    |           |            |              |              |         |            |
| GAPDH        | HUMGAPDH/<br>M33197_M_at | 0.0000201 | -2.0139288 | CYP1B1       | 202436_s_at  | 0.00302 | 1.4743416  |
| KRTDAP       | 230835_at                | 0.0000201 | 2.3959017  | BSG          | 208677_s_at  | 0.00306 | -1.0183154 |
| RPAP3        | 1557984_s_at             | 0.0000204 | -2.2151163 | CYP2C8       | 208147_s_at  | 0.00307 | 1.9068341  |
| GNB5         | 204000_at                | 0.0000204 | 1.4757697  | LOC105376805 | 229874_x_at  | 0.00308 | 1.0038204  |
| PSENN        | 218302_at                | 0.0000207 | -1.5617022 | FAM126B      | 231874_at    | 0.00309 | -1.1735782 |
| COPA         | 214336_s_at              | 0.0000207 | -1.0789092 | SNHG22       | 240006_at    | 0.00309 | 1.055489   |
| MAGEH1       | 218573_at                | 0.0000208 | 1.8804597  | DTNBP1       | 223446_s_at  | 0.00309 | -1.9462095 |
| UBR5-AS1     | 1555888_at               | 0.0000209 | 1.0529041  | BROX         | 239078_at    | 0.00309 | -1.5823814 |
| AURKA        | 204092_s_at              | 0.000021  | -1.8177467 | TRDMT1       | 243504_at    | 0.00309 | 1.1461207  |
| ANKRD46      | 212731_at                | 0.0000212 | 1.0576542  | STEAP2       | 225871_at    | 0.00312 | 1.3774294  |
| DHFR         | 202533_s_at              | 0.0000212 | -2.0699777 | ASAH2B       | 231791_at    | 0.00314 | -1.6102555 |
| SLF2         | 235590_at                | 0.0000212 | 1.16832    | TMEM91       | 229957_at    | 0.00314 | 1.1956014  |
| COL27A1      | 225293_at                | 0.0000212 | 2.4394389  | MAPK1        | 208351_s_at  | 0.00314 | -1.5981608 |
| DTWD1        | 229984_at                | 0.0000213 | 1.130246   | GALE         | 1557651_x_at | 0.00318 | -1.0251583 |
| DHFR         | 202534_x_at              | 0.0000214 | -1.0525313 | CACYBP       | 210691_s_at  | 0.00318 | -1.1772332 |
| ATP1A1-AS1   | 236623_at                | 0.0000215 | 1.766053   | MAPK1        | 1552264_a_at | 0.00318 | -1.0952476 |
| UBASH3B      | 238587_at                | 0.0000217 | -2.0180691 | NMNAT3       | 228090_at    | 0.00318 | 1.1026915  |
| DTWD1        | 236649_at                | 0.0000217 | 1.4628889  | IGK          | 215176_x_at  | 0.00318 | -3.10082   |
| LOC101928487 | 231312_at                | 0.0000218 | 1.0482418  | P4HB         | 200654_at    | 0.00319 | -1.2684878 |
| KAT2B        | 203845_at                | 0.0000219 | 1.3633314  | KMT2C        | 232940_s_at  | 0.0032  | -1.0545099 |
| LOC101930476 | 227893_at                | 0.0000219 | 1.1434353  | LOC100506472 | 235827_at    | 0.0032  | 1.280047   |
| NSMCE4A      | 228506_at                | 0.000022  | 1.6826637  | FAM223A      | 1552607_at   | 0.0032  | 1.0908357  |

|              |             |           |            |         |             |         |            |
|--------------|-------------|-----------|------------|---------|-------------|---------|------------|
| MAGED2       | 213627_at   | 0.0000221 | 1.0703883  | GAL3ST1 | 205670_at   | 0.0032  | 1.8003538  |
| CHEK1        | 205394_at   | 0.0000221 | -1.9339347 | TUBA1B  | 201090_x_at | 0.00321 | -1.0395078 |
| ENC1         | 201340_s_at | 0.0000223 | -1.9356663 | GZMB    | 210164_at   | 0.00321 | -1.6960232 |
| PNISR        | 212176_at   | 0.0000223 | 1.0139455  | SYNGR1  | 213854_at   | 0.00322 | 1.4262979  |
| NQO1         | 201468_s_at | 0.0000224 | -2.5891837 | SF1     | 210172_at   | 0.00322 | 1.2520255  |
| MEX3A        | 236885_at   | 0.0000225 | -1.84104   | SCN5A   | 207413_s_at | 0.00322 | 1.375854   |
| ESPL1        | 204817_at   | 0.0000226 | -1.6885839 | SLC2A5  | 204430_s_at | 0.00323 | -1.0399951 |
| ESPL1        | 38158_at    | 0.0000226 | -1.839604  | PPP1R3E | 227409_at   | 0.00323 | 1.3279559  |
| TTC39A       | 210652_s_at | 0.0000227 | -1.5972347 | SCGB3A1 | 230378_at   | 0.00324 | 3.2563386  |
| LIFR         | 225575_at   | 0.0000227 | 1.5155878  | FOXP2   | 235201_at   | 0.00325 | 2.4588006  |
| PAGE4        | 205564_at   | 0.0000227 | 2.4468305  | RAB21   | 241263_at   | 0.00325 | -1.4142558 |
| IGDCC3       | 230960_at   | 0.0000227 | 1.8267369  | FBXL7   | 213249_at   | 0.00325 | 1.3836318  |
| ELOF1        | 225156_at   | 0.0000227 | -1.3903086 | ADPRHL1 | 238054_at   | 0.00325 | 1.4330157  |
| FAM208A      | 209285_s_at | 0.0000228 | 1.0633917  | ITGA10  | 206766_at   | 0.00325 | 1.0598018  |
| LINC00936    | 238893_at   | 0.0000229 | 1.1799697  | GPER1   | 210640_s_at | 0.00325 | 1.7789887  |
| CENPN        | 228559_at   | 0.0000229 | -1.220544  | CEP128  | 232635_at   | 0.00325 | -1.2468865 |
| PRC1         | 218009_s_at | 0.0000229 | -1.7136991 | DCT     | 205338_s_at | 0.00325 | 1.6934952  |
| FLT1         | 222033_s_at | 0.000023  | -1.1818429 | TSEN54  | 241402_at   | 0.00326 | 1.454659   |
| NDNF         | 219747_at   | 0.000023  | 2.223707   | CD47    | 211075_s_at | 0.00326 | -1.5344157 |
| ELF5         | 220625_s_at | 0.000023  | -3.8339234 | ZEB2    | 235593_at   | 0.00326 | 1.5574957  |
| THRA         | 35846_at    | 0.0000231 | 1.1028309  | MCM10   | 220651_s_at | 0.00327 | -2.1615938 |
| C1orf168     | 238625_at   | 0.0000231 | 2.851266   | ENO1    | 217294_s_at | 0.00327 | -2.0803061 |
| SLC6A8       | 210854_x_at | 0.0000232 | -1.7945022 | THNSL1  | 222931_s_at | 0.00328 | 1.1831576  |
| LOC100506718 | 240259_at   | 0.0000233 | 2.7216478  | PECAM1  | 208982_at   | 0.00329 | -1.1402965 |
| PAK3         | 214078_at   | 0.0000233 | 3.1123662  | TGM3    | 206004_at   | 0.00329 | -1.4646279 |
| PDCD5        | 227751_at   | 0.0000235 | 1.1278461  | RNF187  | 230662_at   | 0.00329 | -1.3953182 |
| LOC100506691 | 241386_at   | 0.0000235 | 2.0548032  | SNORD68 | 229590_at   | 0.0033  | 1.2019642  |

|          |              |           |            |            |             |         |            |
|----------|--------------|-----------|------------|------------|-------------|---------|------------|
| GMFB     | 202543_s_at  | 0.0000236 | -1.1560945 | EMB        | 226789_at   | 0.0033  | -1.3626591 |
| FGD6     | 1555137_a_at | 0.0000236 | -2.4226753 | CKAP2L     | 229610_at   | 0.0033  | -1.4217898 |
| USP53    | 230083_at    | 0.0000236 | 1.3104588  | TMOD2      | 226186_at   | 0.00332 | 1.452755   |
| ARF3     | 200011_s_at  | 0.0000236 | -1.2695269 | BGN        | 213905_x_at | 0.00332 | -1.321922  |
| BAIAP2L1 | 222675_s_at  | 0.0000238 | -1.5877529 | EZR        | 208622_s_at | 0.00333 | -1.2011118 |
| RPL15    | 240806_at    | 0.0000238 | 1.6426138  | C6orf132   | 238028_at   | 0.00335 | -1.1134311 |
| PDIA4    | 208658_at    | 0.0000239 | -1.064225  | REM2       | 235699_at   | 0.00335 | 1.0979754  |
| FOXO3B   | 204132_s_at  | 0.0000239 | -1.1600167 | SAMSN1     | 220330_s_at | 0.00335 | -1.284089  |
| FAXDC2   | 220751_s_at  | 0.0000239 | 2.5772268  | GSTM1      | 204550_x_at | 0.00336 | 1.1798636  |
| CDC16    | 209658_at    | 0.0000239 | 1.0180401  | TMEM65     | 238045_at   | 0.00336 | -1.0189905 |
| SLC1A1   | 213664_at    | 0.000024  | 1.8764869  | LRP6       | 205606_at   | 0.00336 | -1.2996701 |
| UBE3C    | 1554794_a_at | 0.000024  | -1.7417775 | SFPQ       | 201586_s_at | 0.00336 | -1.0803637 |
| SH2B1    | 40149_at     | 0.000024  | 1.1926479  | DLEU2      | 242854_x_at | 0.00336 | -1.6515238 |
| NUDT11   | 219855_at    | 0.0000241 | 2.1546717  | NRG2       | 242303_at   | 0.00336 | 1.4190599  |
| RPS6KA6  | 228503_at    | 0.0000243 | 2.6635786  | F12        | 205774_at   | 0.00337 | -1.6358883 |
| ENOSF1   | 213645_at    | 0.0000244 | 1.7629959  | ALYREF     | 226320_at   | 0.00339 | -1.6349726 |
| HIPK2    | 225368_at    | 0.0000244 | -1.3687863 | GABPB1-AS1 | 235274_at   | 0.0034  | 1.4960345  |
| C1QTNF7  | 239349_at    | 0.0000244 | 2.2595676  | CRK        | 202226_s_at | 0.0034  | -1.3664525 |
| OTUD1    | 226140_s_at  | 0.0000244 | 1.6578938  | NEK10      | 237227_at   | 0.0034  | -1.7213762 |
| CD24     | 208650_s_at  | 0.0000245 | -1.6259431 | STK3       | 211078_s_at | 0.00341 | -1.952475  |
| TMEM167A | 226276_at    | 0.0000246 | -1.375806  | GPATCH2    | 239768_x_at | 0.00341 | -1.1531022 |
| TLE2     | 40837_at     | 0.0000246 | 1.7372602  | CRIP1      | 239049_at   | 0.00341 | 1.2300888  |
| COMMD6   | 225312_at    | 0.0000247 | 1.3502139  | SLC16A1    | 202234_s_at | 0.00341 | 1.6899159  |
| NMT2     | 205005_s_at  | 0.0000248 | 1.3686153  | SYNPO      | 202796_at   | 0.00342 | -1.2397218 |
| DST      | 204455_at    | 0.0000251 | -2.0674566 | WAS        | 38964_r_at  | 0.00343 | -1.015943  |
| ATAD2    | 222740_at    | 0.0000252 | -1.8366783 | FBXO32     | 225328_at   | 0.00343 | 1.4486627  |
| RARA-AS1 | 228037_at    | 0.0000254 | 1.1438341  | SAMD4A     | 212845_at   | 0.00343 | 1.0534425  |

|           |              |           |            |              |              |         |            |
|-----------|--------------|-----------|------------|--------------|--------------|---------|------------|
| F10       | 205620_at    | 0.0000255 | 1.9402632  | UBE2Q2L      | 244498_x_at  | 0.00343 | 1.0069903  |
| MYO15B    | 219173_at    | 0.0000255 | 2.6695121  | CHGB         | 204260_at    | 0.00344 | 1.5823443  |
| METTL3    | 213653_at    | 0.0000255 | 1.1068613  | GABRB3       | 227830_at    | 0.00344 | 1.3911817  |
| PTBP3     | 214698_at    | 0.0000256 | -1.1155577 | NGFR         | 205858_at    | 0.00345 | -1.5878869 |
| TUBB      | 211714_x_at  | 0.0000256 | -1.5679477 | PDAP1        | 202290_at    | 0.00346 | -1.072815  |
| RGS7BP    | 237719_x_at  | 0.0000257 | 3.111372   | UBE4B        | 215533_s_at  | 0.00347 | -1.1772976 |
| ZNF37BP   | 215358_x_at  | 0.0000257 | 1.4896196  | PPID         | 204186_s_at  | 0.00348 | -1.1627775 |
| AZGP1     | 209309_at    | 0.0000258 | 2.4375053  | PDE6B        | 1557777_at   | 0.00349 | 1.4698674  |
| HNRNPA3   | 211931_s_at  | 0.0000258 | -1.0234421 | CHST6        | 223786_at    | 0.0035  | -2.5930866 |
| PGM5-AS1  | 230595_at    | 0.0000259 | 2.752814   | CCNJL        | 219227_at    | 0.0035  | -1.1069045 |
| THAP2     | 230380_at    | 0.0000259 | 1.0142046  | LRRN1        | 226884_at    | 0.0035  | 2.9080023  |
| SYNDIG1   | 219310_at    | 0.000026  | 2.0321434  | SCOC-AS1     | 1556736_at   | 0.0035  | 1.5455968  |
| SMIM10L2B | 227909_at    | 0.000026  | 1.958602   | LOC101928269 | 210365_at    | 0.00351 | -1.2765071 |
| CPD       | 201943_s_at  | 0.0000261 | -1.4507275 | SCARA3       | 223842_s_at  | 0.00352 | 1.3480782  |
| SCML1     | 218793_s_at  | 0.0000262 | 2.2388702  | LOC105372404 | 1562825_at   | 0.00353 | 2.0410036  |
| ZNF148    | 239024_at    | 0.0000263 | 1.1064624  | LOC100507334 | 229096_at    | 0.00353 | 2.277324   |
| SEPP1     | 201427_s_at  | 0.0000264 | 2.0526299  | SNRPB        | 213175_s_at  | 0.00354 | -1.1559949 |
| MSANTD2   | 221208_s_at  | 0.0000266 | 1.4996571  | CHDH         | 231994_at    | 0.00356 | 1.204994   |
| ZDHHC20   | 243786_at    | 0.0000267 | -1.0820438 | RFWD3        | 218564_at    | 0.00356 | -1.0939378 |
| GAPDH     | 217398_x_at  | 0.0000269 | -1.8185698 | LOC100130476 | 243871_at    | 0.00356 | 1.6240441  |
| PLAGL1    | 209318_x_at  | 0.000027  | 1.9345808  | CD24         | 208651_x_at  | 0.00356 | -1.0022562 |
| GPR137B   | 204137_at    | 0.000027  | 1.5437166  | NABP1        | 222872_x_at  | 0.00356 | 1.2244288  |
| CRIP1     | 239050_s_at  | 0.000027  | 1.1140019  | ZNF493       | 211064_at    | 0.00358 | 1.121301   |
| LOC145783 | 221213_s_at  | 0.0000272 | 1.2356751  | IBA57-AS1    | 238188_at    | 0.00358 | 1.2854632  |
| RBM15     | 1555760_a_at | 0.0000273 | -1.0396924 | VNN3         | 220528_at    | 0.00358 | -2.317492  |
| COCH      | 205229_s_at  | 0.0000277 | -2.7521809 | LEF1         | 221558_s_at  | 0.00358 | 1.6123048  |
| KIAA1107  | 1558293_at   | 0.0000277 | 1.3111851  | ZMYND11      | 1554159_a_at | 0.00358 | -1.6021065 |

|         |              |           |            |                    |              |         |            |
|---------|--------------|-----------|------------|--------------------|--------------|---------|------------|
| PEX13   | 1556009_at   | 0.0000277 | -1.3728181 | GNRH1              | 207987_s_at  | 0.00359 | 1.2844694  |
| TAGLN2  | 210978_s_at  | 0.0000278 | -1.5721441 | HNRNPUL2-<br>BSCL2 | 66053_at     | 0.00361 | -1.2630743 |
| RFX5    | 202964_s_at  | 0.0000278 | -1.1861587 | DYNC1I1            | 205348_s_at  | 0.00361 | 2.1552293  |
| MCM10   | 223570_at    | 0.0000278 | -1.8897244 | GALNT18            | 233188_at    | 0.00361 | -1.2280855 |
| HLCS    | 207833_s_at  | 0.0000278 | -2.411612  | HHIP-AS1           | 236632_at    | 0.00361 | 1.2239137  |
| PUS10   | 229362_at    | 0.0000278 | 1.0532063  | FBXO21             | 212229_s_at  | 0.00362 | 1.0173776  |
| KIF21A  | 231875_at    | 0.0000279 | -1.9779643 | PAM                | 202336_s_at  | 0.00362 | 1.0401196  |
| USP13   | 227788_at    | 0.000028  | -1.498076  | PAPSS2             | 203060_s_at  | 0.00364 | -1.6310159 |
| GPSM2   | 233058_at    | 0.000028  | -1.6188689 | PKM                | 201251_at    | 0.00367 | -1.2073618 |
| IRS4    | 1560652_at   | 0.0000281 | 2.215776   | SNORD54            | 216247_at    | 0.00367 | 1.0799739  |
| KLHL28  | 228328_at    | 0.0000281 | 1.1902484  | DEFB124            | 1568375_at   | 0.00367 | 1.380129   |
| PRPF40B | 226966_at    | 0.0000282 | 1.2166808  | PCGF3              | 230408_at    | 0.00368 | 1.1772362  |
| TRO     | 211700_s_at  | 0.0000282 | 3.1454568  | HNRNPDL            | 1554678_s_at | 0.00368 | -1.0243348 |
| GLIDR   | 1555874_x_at | 0.0000282 | 1.3249619  | PDCD4-AS1          | 222307_at    | 0.00369 | 1.1612142  |
| NIPAL2  | 227001_at    | 0.0000284 | 1.3688175  | PITRM1             | 239378_at    | 0.00369 | -1.1560162 |
| HAPLN1  | 230895_at    | 0.0000286 | -3.0706991 | LAMP2              | 200821_at    | 0.00371 | 1.0751256  |
| ERCC1   | 228131_at    | 0.0000286 | 1.335522   | AFF4               | 1555436_a_at | 0.00372 | -1.0587891 |
| BBS10   | 219487_at    | 0.0000286 | 1.4699497  | TRNP1              | 227862_at    | 0.00373 | -1.4084167 |
| DACT2   | 1569648_at   | 0.0000286 | 2.1400755  | NOTCH2NL           | 214722_at    | 0.00374 | 1.1103725  |
| IMPACT  | 218637_at    | 0.0000287 | 1.1815712  | API5               | 214959_s_at  | 0.00374 | -1.0794691 |
| CDKN3   | 209714_s_at  | 0.0000287 | -1.6859705 | LILRB2             | 207697_x_at  | 0.00375 | -1.366586  |
| GDAP1   | 226269_at    | 0.0000288 | 1.8076771  | CHMP4B             | 225119_at    | 0.00375 | -1.1410277 |
| KLHL24  | 221985_at    | 0.0000288 | -1.2794057 | ZSWIM8-AS1         | 214867_at    | 0.00376 | 1.2341691  |
| DEPDC1B | 226980_at    | 0.0000288 | -2.3436488 | ASPRV1             | 235514_at    | 0.00376 | 1.0364556  |
| PRPF40A | 226687_at    | 0.0000289 | 1.1330086  | UGGT1              | 222568_at    | 0.00377 | -1.4841849 |
| NDE1    | 227249_at    | 0.0000294 | -1.3273259 | LDLRAD4            | 207996_s_at  | 0.0038  | 1.1687849  |

|              |              |           |            |              |              |         |            |
|--------------|--------------|-----------|------------|--------------|--------------|---------|------------|
| EEF1A1       | 227708_at    | 0.0000294 | 1.5665997  | SNX21        | 226595_at    | 0.00383 | 1.2574131  |
| RANBP9       | 202583_s_at  | 0.0000296 | -1.0058258 | PDK4         | 1562321_at   | 0.00383 | 2.2143864  |
| TTL          | 224896_s_at  | 0.0000299 | -1.1300498 | PRKCB        | 227824_at    | 0.00383 | -1.667176  |
| NDFIP1       | 222423_at    | 0.0000302 | 1.0689569  | MYH3         | 205940_at    | 0.00383 | 1.442255   |
| DCAF8        | 202250_s_at  | 0.0000303 | 1.0422931  | HPGD         | 203913_s_at  | 0.00383 | 2.8817129  |
| CENPI        | 214804_at    | 0.0000304 | -1.2093285 | METTL21A     | 235177_at    | 0.00383 | -1.0029227 |
| KLF4         | 221841_s_at  | 0.0000304 | 1.8354744  | C10orf25     | 1552422_at   | 0.00383 | 1.2758197  |
| DCN          | 211896_s_at  | 0.0000306 | 2.2900897  | TBC1D8       | 241017_at    | 0.00384 | 1.0174022  |
| CASC7        | 213310_at    | 0.0000307 | -1.0315778 | FCGR3B       | 204007_at    | 0.00388 | -1.1052786 |
| BEX2         | 224367_at    | 0.0000307 | 2.6221111  | LOC101926934 | 241256_at    | 0.00391 | 1.4224136  |
| MMP9         | 203936_s_at  | 0.0000307 | -2.124327  | TMEM50B      | 231696_x_at  | 0.00391 | 1.594819   |
| LYN          | 210754_s_at  | 0.0000308 | -1.1984533 | DISC1FP1     | 1557845_at   | 0.00392 | 1.6029597  |
| ECT2         | 234992_x_at  | 0.000031  | -2.6319429 | TMC5         | 240303_at    | 0.00396 | -2.2640075 |
| CMKLR1       | 210659_at    | 0.0000311 | -1.3635671 | COCH         | 1554242_a_at | 0.00396 | -2.0294995 |
| ST14         | 202005_at    | 0.0000315 | -1.4680999 | HLA-F-AS1    | 222279_at    | 0.00396 | 1.2316989  |
| PTGFR        | 207177_at    | 0.0000316 | 2.2805387  | ARHGGEF28    | 232994_s_at  | 0.00396 | 1.0538081  |
| C16orf59     | 219556_at    | 0.0000316 | -1.5498926 | BRAP         | 209922_at    | 0.00398 | -1.4906549 |
| FANCI        | 213008_at    | 0.0000316 | -1.5958709 | ARSG         | 230856_at    | 0.00399 | 1.3129604  |
| TIA1         | 201449_at    | 0.0000317 | 1.0807835  | S100P        | 204351_at    | 0.00399 | -2.7332056 |
| TIPARP       | 212665_at    | 0.0000317 | 1.0979799  | SAMD11       | 1560477_a_at | 0.00399 | 1.3375538  |
| ECT2         | 219787_s_at  | 0.0000319 | -1.5288164 | CCT2         | 201946_s_at  | 0.004   | -1.1319657 |
| PPP5D1       | 242253_at    | 0.000032  | 1.1397584  | TXNIP        | 201009_s_at  | 0.00401 | 1.1003545  |
| MIF          | 217871_s_at  | 0.000032  | -1.2662759 | STC1         | 204597_x_at  | 0.00401 | -1.1621604 |
| MICAL2       | 212472_at    | 0.0000321 | -1.1897879 | EDNRB        | 204273_at    | 0.00402 | 1.9650272  |
| SKIL         | 206675_s_at  | 0.0000322 | -1.9183583 | PCDH17       | 227289_at    | 0.00403 | -1.253868  |
| RAD51L3-RFFL | 1552651_a_at | 0.0000323 | -1.6007035 | KIZ          | 233241_at    | 0.00404 | 1.7079879  |
| NECTIN4      | 223540_at    | 0.0000324 | -1.8049778 | ZDHHC2       | 222731_at    | 0.00406 | 1.6712994  |

|          |             |           |            |          |             |         |            |
|----------|-------------|-----------|------------|----------|-------------|---------|------------|
| FBN1     | 235318_at   | 0.0000339 | 2.0283722  | EPDR1    | 223253_at   | 0.00406 | 1.3532419  |
| GTSE1    | 204318_s_at | 0.0000339 | -1.75684   | C5       | 205500_at   | 0.00408 | 1.0076294  |
| CCL20    | 205476_at   | 0.0000346 | -4.1609235 | PAX6     | 205646_s_at | 0.00408 | -1.9613487 |
| F11R     | 221664_s_at | 0.0000348 | -1.1799746 | MINOS1   | 228096_at   | 0.00408 | 1.1639277  |
| CTSS     | 202902_s_at | 0.000035  | -1.787045  | RBBP9    | 232751_at   | 0.00409 | -1.5999939 |
| RPS6KA6  | 228502_at   | 0.0000351 | 3.0186002  | CLEC4M   | 210481_s_at | 0.00409 | 1.3866219  |
| ROR1     | 232060_at   | 0.0000351 | 2.0395547  | PSMA3    | 201532_at   | 0.0041  | -1.2248397 |
| UBE2D2   | 201343_at   | 0.0000354 | -1.1635771 | ZNF806   | 236328_at   | 0.0041  | 1.8030828  |
| PAPOLA   | 228569_at   | 0.0000355 | 1.1257122  | SRPRA    | 200917_s_at | 0.00412 | -1.4027097 |
| KLF16    | 226328_at   | 0.0000359 | -1.9605889 | IGHV4-31 | 217236_x_at | 0.00418 | -1.6127239 |
| MRGPRF   | 227727_at   | 0.0000362 | 2.0736857  | XRCC4    | 205071_x_at | 0.00421 | -1.8092751 |
| ZNF214   | 243456_at   | 0.0000364 | 2.4026175  | DOCK5    | 230263_s_at | 0.00422 | 1.5504845  |
| GDE1     | 202593_s_at | 0.0000364 | -2.4079547 | KIZ      | 228291_s_at | 0.00422 | 1.2579919  |
| TTC14    | 225180_at   | 0.0000365 | 1.7321011  | RARG     | 204188_s_at | 0.00422 | -1.2022136 |
| CDK1     | 203213_at   | 0.0000365 | -1.9981102 | DNAJC12  | 223722_at   | 0.00423 | 1.5623395  |
| BMPR1A   | 242731_x_at | 0.0000366 | 1.2592383  | ZNF880   | 235913_at   | 0.00424 | 1.3195129  |
| MAD2L1   | 236312_at   | 0.0000366 | -1.232749  | LTBP1    | 202728_s_at | 0.00425 | -1.5350589 |
| GNG7     | 206896_s_at | 0.000037  | 2.0389134  | FAM134B  | 218532_s_at | 0.00425 | 1.2575273  |
| ACTA2    | 243140_at   | 0.000037  | 2.9120782  | PRELP    | 204223_at   | 0.00426 | 1.6672791  |
| TRMU     | 204317_at   | 0.000037  | -1.7601938 | ZFP92    | 233116_at   | 0.00427 | 1.174601   |
| PAN3-AS1 | 243092_at   | 0.0000374 | 1.609376   | ABCC3    | 208161_s_at | 0.00428 | 2.1591037  |
| LARP4    | 238959_at   | 0.0000375 | -1.7454205 | ESCO2    | 235588_at   | 0.00428 | -1.0745987 |
| SRI      | 208920_at   | 0.0000381 | 1.0926191  | ANGPT2   | 236034_at   | 0.00428 | -1.2396557 |
| F5       | 204714_s_at | 0.0000384 | -2.2460164 | PRICKLE1 | 226065_at   | 0.00428 | 1.5124898  |
| GRAMD1C  | 219313_at   | 0.0000384 | 1.662279   | KNDC1    | 230359_at   | 0.00428 | 1.3678226  |
| INVS     | 235031_at   | 0.0000384 | 1.1859327  | ACSL5    | 222592_s_at | 0.00428 | 2.2358244  |
| CDCP1    | 218451_at   | 0.0000386 | -1.0196302 | ST3GAL1  | 225034_at   | 0.0043  | -1.2282165 |

|              |              |           |            |           |              |         |            |
|--------------|--------------|-----------|------------|-----------|--------------|---------|------------|
| LMLN         | 1553284_s_at | 0.0000392 | -1.5584824 | ANAPC4    | 232524_x_at  | 0.00432 | 1.3766203  |
| ZNF230       | 1557322_at   | 0.0000393 | 1.0737039  | GATM      | 203178_at    | 0.00432 | 1.7584496  |
| INTS6-AS1    | 1557117_at   | 0.0000394 | 2.0591208  | TJP3      | 213412_at    | 0.00434 | -1.5616174 |
| SHMT2        | 214095_at    | 0.0000394 | -1.0480714 | HSPD1     | 200806_s_at  | 0.00435 | -1.3391602 |
| MIR3658      | 209825_s_at  | 0.0000396 | -1.4351492 | APBB2     | 213419_at    | 0.00435 | -1.0269951 |
| MUM1L1       | 229160_at    | 0.0000401 | 2.6559628  | UPP1      | 203234_at    | 0.00435 | -1.0389033 |
| MIR6516      | 221621_at    | 0.0000401 | 1.1174034  | C3orf18   | 219114_at    | 0.00435 | 1.1226651  |
| SLC16A10     | 222939_s_at  | 0.0000401 | -3.2345319 | NUMA1     | 235539_at    | 0.00437 | 1.1642337  |
| SLC6A8       | 213843_x_at  | 0.0000404 | -1.9563499 | EIF4E3    | 225939_at    | 0.00438 | 1.3673013  |
| TLCD1        | 227804_at    | 0.0000408 | -1.100647  | NOP14-AS1 | 214685_at    | 0.00438 | 1.6016889  |
| PLAGL1       | 207943_x_at  | 0.0000411 | 1.7739844  | CCDC57    | 227783_at    | 0.0044  | 1.5135877  |
| LOXL2        | 202998_s_at  | 0.0000412 | -1.3120642 | RASEF     | 235144_at    | 0.00441 | -1.2324706 |
| CENPO        | 226118_at    | 0.0000413 | -1.1176572 | DYNC1H1   | 241084_x_at  | 0.00441 | -1.498225  |
| KIAA1549     | 206044_s_at  | 0.0000413 | -1.0627715 | TYMS      | 202589_at    | 0.00442 | -1.1776866 |
| SSBP2        | 238861_at    | 0.0000416 | 1.7632007  | TFRC      | 207332_s_at  | 0.00442 | -1.255642  |
| COBLL1       | 203642_s_at  | 0.0000417 | -1.9456799 | SLC25A35  | 236064_at    | 0.00442 | 1.9598181  |
| LOC285812    | 230179_at    | 0.000042  | -1.7833106 | TMEM161B  | 238783_at    | 0.00442 | 1.1637027  |
| LOC100507468 | 239113_at    | 0.0000425 | 1.9101374  | CENPN     | 219555_s_at  | 0.00444 | -1.3008695 |
| RUVBL1       | 201614_s_at  | 0.000043  | -1.9837398 | SIX1      | 205817_at    | 0.00445 | -1.75097   |
| REV1         | 222629_at    | 0.0000435 | 1.0390688  | STXBP2    | 1570420_at   | 0.00446 | -1.3021568 |
| CDYL         | 203099_s_at  | 0.0000437 | -1.7940063 | LOC645513 | 239556_at    | 0.00449 | 1.0059753  |
| TGFBR3       | 226625_at    | 0.0000439 | 1.9515018  | PCP2      | 244751_at    | 0.00449 | 1.8326254  |
| ATAD2        | 235266_at    | 0.0000442 | -1.9774876 | DLGAP2    | 221224_s_at  | 0.0045  | -1.2450535 |
| GHITM        | 1554510_s_at | 0.0000442 | -1.0259107 | CTSC      | 201487_at    | 0.00453 | -1.2129219 |
| DSP          | 200606_at    | 0.0000449 | -1.4511864 | ERO1B     | 231944_at    | 0.00455 | 1.8478177  |
| CEP89        | 1554513_s_at | 0.0000449 | -2.2464501 | HEATR3    | 1554478_a_at | 0.00455 | -1.1785374 |
| WDR48        | 221735_at    | 0.0000451 | 1.0659788  | TUBA1B    | 212639_x_at  | 0.00455 | -1.0093434 |

|          |              |           |            |              |              |         |            |
|----------|--------------|-----------|------------|--------------|--------------|---------|------------|
| TMEM243  | 204215_at    | 0.0000452 | 1.2114492  | JMJD1C-AS1   | 1552665_at   | 0.00456 | 1.0200141  |
| TMC5     | 222904_s_at  | 0.0000453 | -2.1219359 | ADGRF1       | 236489_at    | 0.00456 | -2.0648116 |
| HES6     | 226446_at    | 0.0000455 | -2.445444  | SYTL4        | 227703_s_at  | 0.00457 | 1.2523707  |
| C10orf12 | 226892_at    | 0.0000455 | -1.0375232 | FOXA1        | 237086_at    | 0.00458 | -2.9485773 |
| DHCR24   | 200862_at    | 0.0000455 | -1.7006338 | DLX6-AS1     | 230882_at    | 0.00458 | 2.2484004  |
| ME3      | 204663_at    | 0.0000455 | 1.6175163  | SRSF3        | 235324_at    | 0.00458 | 1.0316245  |
| ZEB1-AS1 | 229090_at    | 0.0000456 | 1.0106676  | HM13         | 1558561_at   | 0.00458 | -1.0634269 |
| SOX7     | 228698_at    | 0.0000458 | 1.8011277  | RBPMS        | 209488_s_at  | 0.00459 | 1.1864352  |
| LZTFL1   | 218437_s_at  | 0.0000461 | 1.195212   | MED27        | 215371_at    | 0.00459 | -1.3625891 |
| NAALAD2  | 1554507_at   | 0.0000461 | 3.3706088  | LOC101930404 | 221974_at    | 0.0046  | 1.1667337  |
| LYN      | 202626_s_at  | 0.0000462 | -1.1026973 | LPAR6        | 218589_at    | 0.00461 | 1.3895848  |
| TRIP11   | 230211_at    | 0.0000463 | 1.8511538  | RPL10L       | 217559_at    | 0.00462 | 1.3116496  |
| ENAH     | 1553672_at   | 0.0000466 | -1.341536  | ITGA2B       | 206494_s_at  | 0.00463 | 1.5183634  |
| ELP2     | 230178_s_at  | 0.0000469 | 1.1989121  | CAMTA1       | 213268_at    | 0.00464 | 1.7059164  |
| ZFP36L2  | 201369_s_at  | 0.000047  | 1.6353969  | CNTN1        | 227202_at    | 0.00464 | 2.5273136  |
| ZWINT    | 204026_s_at  | 0.0000471 | -1.6345209 | LUM          | 229554_at    | 0.00465 | 1.5473477  |
| PODN     | 233148_at    | 0.0000472 | 1.5987199  | LOC441242    | 236929_at    | 0.00465 | 1.4663041  |
| SLC17A5  | 221041_s_at  | 0.0000474 | -1.2517341 | CHEK1        | 229423_at    | 0.00466 | 1.3612732  |
| SLC25A36 | 223698_at    | 0.0000475 | 1.4313675  | P2RX7        | 230741_at    | 0.00466 | 1.3384316  |
| CEP290   | 205250_s_at  | 0.0000475 | 1.1468375  | RAPGEF1      | 225738_at    | 0.00466 | -1.114131  |
| DAGLB    | 225832_s_at  | 0.0000477 | -1.5042846 | RHBDL2       | 1554897_s_at | 0.00466 | -1.5797255 |
| HEXDC    | 1555866_a_at | 0.0000479 | 1.0145364  | LOC101928068 | 1557674_s_at | 0.00467 | 1.4775812  |
| ATL2     | 1553603_s_at | 0.0000481 | -1.1052148 | HIPK1        | 1552516_a_at | 0.00468 | -1.6084772 |
| RHOJ     | 235489_at    | 0.0000488 | 1.9618753  | LINC00304    | 1564334_at   | 0.00471 | 1.5793427  |
| TLE4     | 204872_at    | 0.0000488 | 2.033777   | ZNF667       | 236635_at    | 0.00472 | 2.0263134  |
| STRN3    | 215505_s_at  | 0.0000492 | -1.8983328 | PSMA7        | 201114_x_at  | 0.00473 | -1.0613405 |
| VPS53    | 1559108_at   | 0.0000493 | -2.2181453 | IRS2         | 209184_s_at  | 0.00474 | 1.2224206  |

|            |              |           |            |              |              |         |            |
|------------|--------------|-----------|------------|--------------|--------------|---------|------------|
| PRDX1      | 208680_at    | 0.0000493 | -1.4200924 | FBXL17       | 238174_at    | 0.00474 | 1.0053336  |
| ZDHHC12    | 226088_at    | 0.0000498 | -1.8519593 | ATP1A1       | 220948_s_at  | 0.00474 | -1.0214121 |
| PAM        | 212958_x_at  | 0.0000499 | 1.6077399  | RXFP1        | 238206_at    | 0.00474 | 3.1805411  |
| CACFD1     | 219223_at    | 0.0000499 | -1.2808188 | MBNL2        | 203640_at    | 0.00478 | 1.0083459  |
| PPIB       | 200968_s_at  | 0.0000504 | -1.4158541 | BHMT2        | 242169_at    | 0.00479 | 1.6723754  |
| DUSP1      | 201044_x_at  | 0.0000508 | 1.4597959  | PIP5K1A      | 211205_x_at  | 0.00479 | -1.3958639 |
| ZNF273     | 215239_x_at  | 0.0000511 | 1.0488042  | ETS1         | 224833_at    | 0.00479 | -1.0803442 |
| ARGLU1     | 218067_s_at  | 0.0000512 | 1.0876105  | NEIL3        | 219502_at    | 0.0048  | -1.3321721 |
| ANGPT2     | 205572_at    | 0.0000513 | -2.1661749 | MARCKSL1     | 200644_at    | 0.0048  | -1.1002304 |
| A2M-AS1    | 1564139_at   | 0.0000513 | 1.1046165  | ANKRD20A5P   | 1559170_at   | 0.0048  | 1.4793089  |
| PPFIA1     | 210236_at    | 0.0000514 | -1.1672837 | STS          | 203768_s_at  | 0.00481 | -1.1818682 |
| KIAA0101   | 211713_x_at  | 0.0000516 | -1.5698567 | ESRRG        | 209966_x_at  | 0.00483 | -1.2238774 |
| HNMT       | 204112_s_at  | 0.0000516 | 1.7792718  | PRCD         | 230015_at    | 0.00483 | 1.2451277  |
| SLC25A16   | 214140_at    | 0.0000517 | -1.1789165 | NACAD        | 213630_at    | 0.00483 | 1.5116582  |
| POLQ       | 219510_at    | 0.0000518 | -1.7838692 | RAP1A        | 1555340_x_at | 0.00485 | -1.3614912 |
| DCN        | 242605_at    | 0.0000521 | 1.9369588  | SDHC         | 210131_x_at  | 0.00486 | -1.1084049 |
| EFS        | 210880_s_at  | 0.0000522 | 2.0035376  | SHROOM4      | 232404_at    | 0.00486 | 1.5614392  |
| ETS1       | 1555355_a_at | 0.0000528 | -2.2498241 | PFKFB4       | 228499_at    | 0.00487 | -1.0077377 |
| ZXDA       | 243521_at    | 0.0000531 | 1.0064421  | EPPK1        | 208156_x_at  | 0.00487 | -1.1028281 |
| ESYT2      | 224699_s_at  | 0.0000533 | -1.0922848 | LOC101930114 | 237154_at    | 0.0049  | 1.4310813  |
| ANXA3      | 209369_at    | 0.0000533 | 1.4063126  | ITGB2        | 202803_s_at  | 0.0049  | -1.0000458 |
| OTUD6B-AS1 | 226341_at    | 0.0000535 | 1.1769274  | RPS27L       | 238935_at    | 0.0049  | 1.1186354  |
| WBP2NL     | 1552514_at   | 0.0000536 | 2.764068   | SIRPB1       | 1554624_a_at | 0.00491 | -1.6325036 |
| JUN        | 201464_x_at  | 0.0000536 | 1.0874239  | KAZALD1      | 217511_at    | 0.00491 | 1.6862106  |
| SURF1      | 217646_at    | 0.0000536 | 1.1772367  | NLGN1        | 231361_at    | 0.00491 | 2.1036942  |
| ULBP2      | 238542_at    | 0.0000536 | -2.2848782 | RBPM5        | 209487_at    | 0.00494 | 1.0506766  |
| PAPLN      | 226435_at    | 0.0000541 | 2.0077047  | HGF          | 210755_at    | 0.00494 | 1.1752776  |

|              |             |           |            |            |              |         |            |
|--------------|-------------|-----------|------------|------------|--------------|---------|------------|
| GHR          | 205498_at   | 0.0000541 | 2.4555647  | GJA4       | 204904_at    | 0.00495 | 1.7253122  |
| ECHDC1       | 223088_x_at | 0.0000542 | -1.1471144 | SPIRE1     | 1559517_a_at | 0.00497 | -1.5792453 |
| TRMT1L       | 233750_s_at | 0.0000547 | -1.332679  | CELF2      | 1554569_a_at | 0.00499 | -1.135912  |
| KIF2A        | 203087_s_at | 0.0000547 | -1.1419764 | IGF2BP3    | 203820_s_at  | 0.00499 | -2.2053477 |
| NAP1L2       | 219368_at   | 0.0000547 | 2.0234997  | RANBP2     | 201711_x_at  | 0.00499 | -1.0499405 |
| CYB5B        | 238554_at   | 0.0000547 | 1.0148993  | NR4A3      | 216979_at    | 0.005   | 1.2279491  |
| USP51        | 229278_at   | 0.0000547 | 1.974773   | PPIEL      | 222054_at    | 0.005   | 1.5272499  |
| RSBN1        | 222790_s_at | 0.0000548 | 1.0459289  | ST8SIA4    | 242943_at    | 0.005   | -1.6579217 |
| CLDN7        | 202790_at   | 0.0000555 | -1.7816806 | PTGIS      | 208131_s_at  | 0.00501 | 1.829255   |
| PDXK         | 202671_s_at | 0.0000561 | -1.1947737 | SIM2       | 206558_at    | 0.00502 | -1.3468187 |
| LOC100507283 | 1563776_at  | 0.0000561 | 1.983012   | RASSF8-AS1 | 242358_at    | 0.00504 | 1.4673466  |
| TCP11L1      | 205796_at   | 0.0000563 | -1.6586499 | SNORA11E   | 221261_x_at  | 0.00505 | 1.8214053  |
| NQO1         | 201467_s_at | 0.0000567 | -2.7789275 | EIF1       | 228967_at    | 0.00505 | 1.0390872  |
| PCDHB15      | 231789_at   | 0.0000568 | 2.3304255  | PRDM6      | 236577_at    | 0.00506 | 1.5177718  |
| LPCAT2       | 239598_s_at | 0.000057  | 1.1041775  | HMGA1      | 206074_s_at  | 0.00506 | -1.2488649 |
| RNASE4       | 213397_x_at | 0.000057  | 2.0982928  | MTFR2      | 234944_s_at  | 0.00507 | -1.0820548 |
| ARL8B        | 222442_s_at | 0.0000573 | -1.1346499 | HIPK3      | 207764_s_at  | 0.00508 | -1.5749964 |
| FUT9         | 207696_at   | 0.0000574 | 2.3981872  | MDFIC      | 211675_s_at  | 0.00508 | 1.3579059  |
| DCHS1        | 222101_s_at | 0.0000578 | 1.744811   | THEM4      | 229253_at    | 0.0051  | 1.0356317  |
| LOC101928560 | 244618_at   | 0.0000579 | 1.2138602  | KALRN      | 205635_at    | 0.00511 | -1.1312616 |
| DLAT         | 212568_s_at | 0.0000579 | -1.0967335 | PRDM1      | 228964_at    | 0.00511 | 1.1782496  |
| RBM26        | 226316_at   | 0.000058  | 1.1656327  | LPP        | 1558469_at   | 0.00511 | -1.2704014 |
| CHRDL1       | 209763_at   | 0.0000582 | 2.8446859  | SGCE       | 204688_at    | 0.00512 | 1.3495007  |
| CD200        | 209583_s_at | 0.0000583 | 1.9431636  | SNX13      | 215820_x_at  | 0.00513 | -1.2230306 |
| PIGL         | 239943_x_at | 0.0000584 | 1.7820575  | RAB28      | 234628_at    | 0.00514 | -1.1404827 |
| MAD1L1       | 204857_at   | 0.0000586 | -1.922992  | DPP10-AS1  | 236351_at    | 0.00514 | 2.3548972  |
| LOC101930404 | 241834_at   | 0.0000593 | 1.9539799  | CCDC24     | 228994_at    | 0.00515 | 1.4221144  |

|              |              |           |            |              |              |         |            |
|--------------|--------------|-----------|------------|--------------|--------------|---------|------------|
| APOE         | 203381_s_at  | 0.0000593 | -2.203665  | EMP2         | 225079_at    | 0.00516 | -1.0236818 |
| MED30        | 227786_at    | 0.0000601 | 1.236651   | CENPJ        | 234023_s_at  | 0.00519 | -1.6519015 |
| PDK1         | 226452_at    | 0.0000605 | -1.5223422 | TNFRSF21     | 214581_x_at  | 0.0052  | -1.4647588 |
| LOC101929500 | 202552_s_at  | 0.0000605 | 1.331778   | HELLS        | 220085_at    | 0.00522 | -1.2452275 |
| ICAM1        | 202638_s_at  | 0.0000605 | -1.2358515 | NUDT2        | 218609_s_at  | 0.00523 | 1.3510153  |
| FAM98A       | 212333_at    | 0.0000606 | -1.0514115 | LOC101927137 | 214796_at    | 0.00526 | 1.2552236  |
| GLI1         | 206646_at    | 0.0000609 | 1.9955343  | SFRP1        | 202037_s_at  | 0.00526 | 1.7870561  |
| AURKB        | 209464_at    | 0.0000612 | -1.343611  | SORBS2       | 225728_at    | 0.00527 | 1.4990434  |
| GOLGA8N      | 213737_x_at  | 0.0000612 | 1.5732378  | CACNB2       | 207776_s_at  | 0.00527 | 1.1623347  |
| CARMN        | 1558828_s_at | 0.0000613 | 3.0521484  | NOL12        | 222057_at    | 0.00528 | 1.0183365  |
| GAPDH        | 212581_x_at  | 0.0000615 | -1.4107399 | SLAMF8       | 219386_s_at  | 0.00528 | -1.4615787 |
| ABCF2        | 207622_s_at  | 0.0000621 | -2.0147199 | HAUS7        | 207891_s_at  | 0.00529 | -1.0783388 |
| RRAGD        | 221524_s_at  | 0.0000621 | -2.2121742 | DOCK5        | 230207_s_at  | 0.0053  | 1.4910207  |
| LPAR1        | 204036_at    | 0.0000622 | 1.5206929  | SP2-AS1      | 238953_at    | 0.0053  | 1.0596289  |
| KIAA1328     | 232358_at    | 0.0000622 | 1.2224902  | MGARP        | 223734_at    | 0.0053  | 1.1782379  |
| TPST2        | 204079_at    | 0.0000622 | 1.7780996  | CLEC2B       | 209732_at    | 0.0053  | 1.2103034  |
| RFXAP        | 229431_at    | 0.0000624 | 1.047389   | LOC101926921 | 240873_x_at  | 0.0053  | -1.5704454 |
| GKAP1        | 234192_s_at  | 0.0000627 | 1.0711915  | LRFN4        | 219491_at    | 0.00531 | -1.6674091 |
| G3BP2        | 206383_s_at  | 0.0000628 | -1.0102891 | AKAP10       | 205045_at    | 0.00533 | -1.4271224 |
| ZEB2         | 228333_at    | 0.0000628 | 1.2918082  | COX10-AS1    | 230451_at    | 0.00534 | 1.6399252  |
| RASSF5       | 223322_at    | 0.000063  | -1.0115523 | STON2        | 235852_at    | 0.00534 | -1.6017056 |
| SGPL1        | 212322_at    | 0.000063  | -1.0421492 | VEGFC        | 209946_at    | 0.00534 | 1.0337252  |
| SIDT2        | 218765_at    | 0.0000632 | 1.0109533  | ELFN2        | 1559072_a_at | 0.00535 | -1.6643655 |
| ACSL5        | 218322_s_at  | 0.0000636 | 2.6629904  | SNTB1        | 214708_at    | 0.00535 | -1.5876993 |
| N6AMT1       | 234676_s_at  | 0.0000637 | 1.6531352  | EXOC6B       | 215417_at    | 0.00535 | 1.0388812  |
| LOC101930324 | 202395_at    | 0.0000637 | -1.1765947 | ST3GAL1      | 225033_at    | 0.00536 | -1.1858246 |
| ARF4         | 201096_s_at  | 0.000064  | -1.3490705 | NRK          | 227971_at    | 0.00538 | 1.5172263  |

|              |                          |           |            |              |              |         |            |
|--------------|--------------------------|-----------|------------|--------------|--------------|---------|------------|
| CDC7         | 204510_at                | 0.0000641 | -1.3486295 | EMID1        | 1564251_at   | 0.00539 | -1.4747568 |
| WDFY3-AS2    | 238081_at                | 0.0000641 | 1.6776827  | THAP2        | 223588_at    | 0.0054  | 1.4792921  |
| PRCC         | 208938_at                | 0.0000641 | -1.1197926 | NENF         | 214125_s_at  | 0.0054  | 1.2369261  |
|              | AFFX-                    |           |            |              |              |         |            |
| GAPDH        | HUMGAPDH/<br>M33197_3_at | 0.0000644 | -1.1615546 | LMF1         | 227984_at    | 0.00541 | 1.4418663  |
| ORC6         | 219105_x_at              | 0.0000644 | -1.2632666 | ERFE         | 229622_at    | 0.00541 | -1.7463723 |
| PPP2R3A      | 207749_s_at              | 0.0000647 | -1.2422205 | RGN          | 210751_s_at  | 0.00542 | 1.3701791  |
| WAPL         | 1554441_a_at             | 0.0000648 | -1.0975329 | CDC42EP5     | 227850_x_at  | 0.00544 | 1.1359441  |
| ZNF83        | 221645_s_at              | 0.0000651 | 1.5067498  | ASXL3        | 214162_at    | 0.00547 | 1.7883571  |
| CENPF        | 207331_at                | 0.0000658 | -2.2365709 | GJB2         | 223278_at    | 0.00547 | -1.9123699 |
| HIST1H3F     | 206110_at                | 0.0000664 | -1.9024805 | PRRG3        | 220433_at    | 0.00547 | 1.3243467  |
| BCAP29       | 225677_at                | 0.0000667 | 1.0455109  | LINC00926    | 230245_s_at  | 0.00548 | 1.4131096  |
| CTLA4        | 236341_at                | 0.0000673 | -2.9337744 | SMYD5        | 209516_at    | 0.00549 | 1.0220249  |
| WNT2         | 205648_at                | 0.0000677 | 1.5869844  | RHOV         | 241990_at    | 0.0055  | -1.5974726 |
| LOC100507557 | 241745_at                | 0.0000679 | 1.6641228  | PELI2        | 219132_at    | 0.00551 | 1.6907202  |
| ENPP2        | 209392_at                | 0.0000681 | 2.2965789  | CLMP         | 226834_at    | 0.00551 | 1.70022    |
| CKMT2-AS1    | 235443_at                | 0.0000687 | 1.124552   | LOC102723897 | 225035_x_at  | 0.00553 | 1.0479552  |
| KLHL20       | 204176_at                | 0.0000688 | 1.0264457  | LOC102724814 | 1557263_s_at | 0.00556 | 1.6512311  |
| CAPN3        | 210944_s_at              | 0.0000694 | 1.7515459  | IGFBP7       | 213910_at    | 0.00557 | 1.420933   |
| KIAA1429     | 238818_at                | 0.0000694 | 1.0251714  | ESPN         | 233979_s_at  | 0.00557 | -1.6692496 |
| PARD3-AS1    | 230545_at                | 0.0000695 | 1.964505   | FCN3         | 205866_at    | 0.00557 | -1.2051432 |
| TRIM52-AS1   | 1557507_at               | 0.0000698 | 2.0546159  | BTNL9        | 241496_at    | 0.00557 | -1.4308628 |
| TMEM35B      | 213698_at                | 0.0000698 | 1.0161611  | WTAP         | 227621_at    | 0.00559 | 1.158301   |
| PLA2G4C      | 209785_s_at              | 0.00007   | 1.6942562  | PLP2         | 201136_at    | 0.00563 | -1.3472035 |
| SLC25A21-AS1 | 230307_at                | 0.0000701 | 2.0259656  | SPPL3        | 1566897_at   | 0.00564 | -1.5310004 |
| SSPN         | 204963_at                | 0.0000704 | 2.2297736  | IL1R1        | 202948_at    | 0.00564 | 1.0337113  |

|              |             |           |            |              |             |         |            |
|--------------|-------------|-----------|------------|--------------|-------------|---------|------------|
| CIRBP        | 230142_s_at | 0.0000705 | 1.4441111  | CCDC85A      | 235228_at   | 0.00566 | 2.1733405  |
| GBAT2        | 230787_at   | 0.0000707 | -1.1434474 | LRRC20       | 218550_s_at | 0.00566 | -1.2446367 |
| CORO1C       | 222409_at   | 0.0000711 | -1.332665  | LOC101927305 | 237771_s_at | 0.00566 | 1.6850235  |
| IRS1         | 242979_at   | 0.0000712 | 1.6910717  | APOE         | 212884_x_at | 0.00567 | -1.0460384 |
| ZNF638       | 1554248_at  | 0.0000713 | 1.0014416  | KANSL1-AS1   | 230388_s_at | 0.00567 | 1.066197   |
| GPAT4        | 224776_at   | 0.0000716 | -1.060132  | SEMA5B       | 223610_at   | 0.00567 | 1.4199825  |
| SSBP2        | 203787_at   | 0.0000719 | 1.2450962  | LOC101927841 | 239823_at   | 0.00569 | 1.8487269  |
| SERHL2       | 214243_s_at | 0.0000727 | 1.9700557  | CARS2        | 237555_at   | 0.00569 | -1.7908832 |
| PARBP        | 227928_at   | 0.0000727 | -2.0438847 | HIC1         | 230218_at   | 0.00569 | 1.2187534  |
| SEC24A       | 212902_at   | 0.0000736 | -1.0685412 | MESP1        | 224476_s_at | 0.0057  | -1.5757232 |
| AGFG1        | 226561_at   | 0.0000738 | 1.2115492  | RHOJ         | 243481_at   | 0.0057  | 1.5394556  |
| CTSK         | 202450_s_at | 0.0000738 | 1.3580756  | OTUD4        | 203479_s_at | 0.0057  | -1.4243379 |
| PTPN11       | 209896_s_at | 0.0000739 | -1.6674803 | POLQ         | 207746_at   | 0.00571 | -1.2654006 |
| KIF18A       | 221258_s_at | 0.000074  | -1.2008429 | SAA2-SAA4    | 208607_s_at | 0.00572 | -2.2338106 |
| SIX4         | 231797_at   | 0.000074  | -2.1237245 | CDC27        | 217878_s_at | 0.00572 | -1.2987626 |
| LRRC1        | 231872_at   | 0.000074  | 1.0648676  | SERPINB5     | 204855_at   | 0.00574 | -2.3388084 |
| LOC100506125 | 231232_at   | 0.0000747 | 2.1313002  | IGFBP7-AS1   | 1557395_at  | 0.00574 | 1.7549836  |
| LIFR         | 225571_at   | 0.0000748 | 1.4828416  | UBASH3B      | 228353_x_at | 0.00575 | -1.4303293 |
| RNF180       | 242033_at   | 0.000075  | 2.0978184  | STAT5B       | 1555086_at  | 0.00575 | 1.5809795  |
| TAOK1        | 227454_at   | 0.0000754 | -1.2241462 | CNIH4        | 222721_at   | 0.00577 | 1.6366261  |
| DHFR         | 48808_at    | 0.0000754 | -1.3559506 | SEC14L2      | 232894_at   | 0.00578 | -1.3609993 |
| FOXA1        | 204667_at   | 0.0000756 | -2.7717744 | COL9A2       | 213622_at   | 0.00578 | 1.0067801  |
| PHYKPL       | 226519_s_at | 0.0000759 | 1.0204224  | NR4A2        | 204621_s_at | 0.0058  | 1.1908301  |
| SULF1        | 212344_at   | 0.0000765 | -1.9358668 | SOAT1        | 221561_at   | 0.0058  | -1.0314443 |
| LOC101928068 | 235883_at   | 0.0000767 | 1.4986153  | LRRC14       | 203495_at   | 0.0058  | 1.1054564  |
| ARGLU1       | 228477_at   | 0.0000767 | 1.9052822  | FAM50B       | 205775_at   | 0.00581 | 1.1167262  |
| SFPQ         | 201585_s_at | 0.000077  | -1.2221861 | FCHSD1       | 226698_at   | 0.00582 | 1.3670101  |

|              |              |           |            |              |              |         |            |
|--------------|--------------|-----------|------------|--------------|--------------|---------|------------|
| PDK3         | 221957_at    | 0.0000772 | -1.0314005 | ALDOA        | 238996_x_at  | 0.00582 | -1.71899   |
| SCYL2        | 221220_s_at  | 0.0000773 | -1.6460403 | NUB1         | 1559732_at   | 0.00582 | 1.7286039  |
| CCNB1        | 214710_s_at  | 0.0000773 | -1.9502089 | BAZ2A        | 215437_x_at  | 0.00583 | -1.3889658 |
| TOX2         | 228737_at    | 0.0000773 | -1.8052008 | RSPO1        | 241450_at    | 0.00583 | 1.5507986  |
| ACOX2        | 205364_at    | 0.0000774 | 1.9322474  | PRRG3        | 229118_at    | 0.00584 | 1.4911814  |
| TMEM170B     | 235798_at    | 0.0000778 | 1.625975   | ATP1B1       | 201242_s_at  | 0.00584 | -1.1287498 |
| KLHL31       | 239398_at    | 0.0000778 | 1.9744463  | DAGLB        | 225833_at    | 0.00585 | -1.1216914 |
| LETM2        | 1557415_s_at | 0.0000782 | 1.2741842  | LOC100507855 | 230630_at    | 0.00586 | -1.2996372 |
| MMP12        | 204580_at    | 0.0000785 | -3.0437056 | SOCS4        | 1552792_at   | 0.00586 | -1.2326068 |
| FAM69B       | 229002_at    | 0.0000795 | 1.6323567  | LOC100506476 | 243680_at    | 0.00588 | 2.0313779  |
| NARF         | 237299_at    | 0.0000795 | -1.1415952 | NIPSNAP1     | 201708_s_at  | 0.00591 | -1.2346178 |
| STAT3        | 208991_at    | 0.0000796 | -1.1496263 | PTPN11       | 209895_at    | 0.00594 | -1.0758546 |
| PRTG         | 229073_at    | 0.0000797 | 1.7807318  | TMEM206      | 222752_s_at  | 0.00594 | -1.0978277 |
| LOC100129518 | 216841_s_at  | 0.0000798 | -1.7318486 | HUNK         | 1555935_s_at | 0.00595 | -1.7627501 |
| RBM5         | 209936_at    | 0.0000798 | 2.1140275  | GLB1L3       | 1569886_a_at | 0.00598 | 2.3718504  |
| SDCCAG3      | 230058_at    | 0.00008   | 1.1212087  | ITCH         | 236235_at    | 0.00598 | 1.2461353  |
| CBFA2T3      | 208056_s_at  | 0.0000802 | 1.4004939  | ANXA1        | 201012_at    | 0.00599 | -1.4513993 |
| EBLN3P       | 225635_s_at  | 0.0000805 | 1.0441689  | LOC105377458 | 1557762_at   | 0.00599 | 2.8769255  |
| HLX          | 214438_at    | 0.0000809 | -1.9393477 | LINC00965    | 222184_at    | 0.006   | 1.4520906  |
| WAC          | 230154_at    | 0.0000811 | 1.0318678  | CXXC4        | 220277_at    | 0.00601 | 1.4207501  |
| GULP1        | 204235_s_at  | 0.0000817 | 1.6749757  | NAV2         | 222599_s_at  | 0.00602 | -1.0192495 |
| ZAK          | 225662_at    | 0.000082  | 1.083619   | CYP1B1       | 202435_s_at  | 0.00603 | 1.2719688  |
| MKI67        | 212020_s_at  | 0.0000829 | -1.3858773 | SELL         | 204563_at    | 0.00604 | -1.2811612 |
| MROH1        | 230361_at    | 0.0000829 | -1.3410546 | RCAN3        | 219864_s_at  | 0.00606 | -1.6677179 |
| BCL2L11      | 222343_at    | 0.0000832 | -1.1280137 | KCTD15       | 222664_at    | 0.00606 | 1.085924   |
| WBSCR22      | 207628_s_at  | 0.0000834 | -1.1156433 | PLEKHH2      | 239568_at    | 0.00606 | 2.1971919  |
| MAPK1        | 212271_at    | 0.000084  | -1.0699896 | GSR          | 205770_at    | 0.00606 | -1.1072733 |

|              |              |           |            |              |              |         |            |
|--------------|--------------|-----------|------------|--------------|--------------|---------|------------|
| TNPO1        | 1556116_s_at | 0.0000844 | 1.9834952  | NT5E         | 1553995_a_at | 0.00607 | 1.6055483  |
| GK           | 207387_s_at  | 0.0000854 | -1.5643473 | LEFTY1       | 206012_at    | 0.00608 | 1.9200684  |
| FANCB        | 1553244_at   | 0.0000855 | -1.9028529 | PBDC1        | 224177_s_at  | 0.00609 | -1.0540366 |
| FAM13A-AS1   | 243020_at    | 0.000086  | 1.1892153  | C1orf56      | 230468_s_at  | 0.00609 | 1.5353968  |
| COL28A1      | 239921_at    | 0.0000861 | 1.9822611  | DPYD         | 204646_at    | 0.0061  | 1.6167906  |
| SRGAP1       | 227484_at    | 0.0000871 | -1.4687902 | PCBP3        | 205663_at    | 0.00611 | 1.2787296  |
| COL4A1       | 211980_at    | 0.0000871 | -1.4335666 | FAM111B      | 1557129_a_at | 0.00615 | -1.5654637 |
| SLC22A23     | 223194_s_at  | 0.0000876 | -1.2089488 | GJA5         | 226701_at    | 0.00615 | -1.3627927 |
| NPL          | 240440_at    | 0.0000876 | -1.915796  | SLITRK6      | 232481_s_at  | 0.00616 | 2.5917964  |
| ZNF22        | 218005_at    | 0.0000878 | 1.0420559  | EDNRB        | 204271_s_at  | 0.00616 | 1.1344996  |
| ABHD17C      | 225436_at    | 0.000088  | -1.1053983 | LOC102723845 | 235898_at    | 0.00616 | 1.1035147  |
| CD44         | 229221_at    | 0.000088  | -1.8179594 | HK3          | 205936_s_at  | 0.00616 | -1.6810017 |
| ASAP1        | 224790_at    | 0.0000894 | -1.2348329 | LINC00550    | 1557717_at   | 0.00616 | -1.7282119 |
| CPT1A        | 203634_s_at  | 0.0000898 | -2.0306833 | SHANK2       | 213307_at    | 0.00617 | 1.3294155  |
| CDCA5        | 224753_at    | 0.0000903 | -1.6752967 | CYP46A1      | 220331_at    | 0.00617 | 1.7209416  |
| WDR61        | 215156_at    | 0.0000903 | 1.1549958  | GZF1         | 234055_s_at  | 0.00618 | 1.1444683  |
| JAZF1-AS1    | 1559650_at   | 0.000091  | 2.3596645  | LUC7L3       | 242389_at    | 0.00618 | 1.0931783  |
| KISS1R       | 242517_at    | 0.0000925 | -2.2284833 | TTN-AS1      | 1556043_a_at | 0.00618 | 1.5101129  |
| DEPDC1       | 232278_s_at  | 0.0000926 | -2.7682302 | GAMT         | 1552474_a_at | 0.00621 | 1.266249   |
| MEIS3P1      | 214077_x_at  | 0.0000928 | 1.0865795  | LOC100996693 | 205265_s_at  | 0.00622 | 1.2679707  |
| ABI2         | 211793_s_at  | 0.0000932 | -1.5127086 | ATP11B       | 212536_at    | 0.00622 | 1.1529264  |
| RGL3         | 1556354_s_at | 0.0000933 | 2.327749   | COL4A2       | 211966_at    | 0.00622 | -1.4753746 |
| JAM2         | 229127_at    | 0.0000933 | 2.0115303  | PSEN1        | 207782_s_at  | 0.00623 | -1.3395535 |
| KLF10        | 202393_s_at  | 0.0000936 | 1.0303085  | JAM2         | 219213_at    | 0.00623 | 1.4467058  |
| SSR1         | 200890_s_at  | 0.0000939 | -1.1394279 | KIAA2026     | 238490_at    | 0.00623 | -1.2247216 |
| LOC101928605 | 1555890_at   | 0.0000939 | 1.4693986  | MAL          | 204777_s_at  | 0.00623 | -2.3688536 |
| PGGHG        | 219359_at    | 0.0000943 | 2.390188   | NEBL         | 203961_at    | 0.00627 | 1.9726813  |

|            |             |           |            |              |             |         |            |
|------------|-------------|-----------|------------|--------------|-------------|---------|------------|
| ANTXR2     | 228573_at   | 0.0000944 | 1.5326847  | STAM2        | 208194_s_at | 0.00628 | -1.681354  |
| NR4A1      | 211143_x_at | 0.0000952 | 1.8165661  | CALML4       | 64408_s_at  | 0.00629 | -1.1123808 |
| CCNB1      | 228729_at   | 0.0000964 | -1.8962513 | SEL1L3       | 212314_at   | 0.0063  | -1.2359633 |
| CDK1       | 203214_x_at | 0.0000967 | -1.6811587 | EGR2         | 205249_at   | 0.00631 | 1.3251732  |
| ALPPL2     | 210431_at   | 0.0000968 | -3.0152098 | FES          | 205418_at   | 0.00631 | 1.5245663  |
| XPO5       | 223055_s_at | 0.0000974 | -1.2932953 | PRRC2C       | 211947_s_at | 0.00631 | -1.334374  |
| ZNF213-AS1 | 222170_at   | 0.0000977 | 1.7968664  | GIN52        | 221521_s_at | 0.00632 | -1.260076  |
| CD24       | 209772_s_at | 0.000098  | -1.5462668 | GUSBP5       | 240063_at   | 0.00634 | 1.0725591  |
| SETD6      | 219751_at   | 0.0000988 | 1.1933862  | PCDH10       | 1552925_at  | 0.00634 | 1.5626054  |
| MROH7      | 214147_at   | 0.0000989 | 2.3411322  | EN2          | 207060_at   | 0.00635 | 1.7108509  |
| QSOX1      | 201482_at   | 0.000099  | -1.3496285 | FAM110B      | 228790_at   | 0.00636 | 1.5920433  |
| OMD        | 205907_s_at | 0.000099  | 2.5406599  | FCRL3        | 231093_at   | 0.00636 | -1.1072255 |
| METTL7A    | 207761_s_at | 0.0000995 | 1.6687603  | FBXO17       | 220233_at   | 0.00637 | 2.4506291  |
| HERPUD1    | 217168_s_at | 0.000101  | 1.1404536  | PLK4         | 204886_at   | 0.00638 | -1.1442673 |
| SPATA20    | 218164_at   | 0.000101  | 1.3153169  | ECHDC3       | 219298_at   | 0.00638 | 1.2078371  |
| AIM1L      | 220289_s_at | 0.000102  | -2.6868444 | PHTF1        | 215285_s_at | 0.00639 | -1.1525845 |
| FMO5       | 205776_at   | 0.000102  | 1.8484002  | CYS1         | 228739_at   | 0.00639 | 2.0128399  |
| MYH10      | 213067_at   | 0.000102  | -1.1897378 | ARNTL2       | 224204_x_at | 0.00639 | -1.5300925 |
| LMNB2      | 216952_s_at | 0.000105  | -1.320276  | LAMP5        | 219463_at   | 0.00639 | 2.6636617  |
| DHRS4-AS1  | 227446_s_at | 0.000105  | 1.1104805  | B3GAT1       | 219521_at   | 0.0064  | 1.6344817  |
| CDC42      | 208727_s_at | 0.000106  | -1.0868329 | CCKBR        | 210381_s_at | 0.0064  | -1.1293744 |
| WT1-AS     | 206954_at   | 0.000106  | 2.3767618  | CDC20B       | 1553655_at  | 0.00642 | -3.0444837 |
| ZCWPW1     | 220618_s_at | 0.000107  | 1.9908497  | INPP4B       | 205376_at   | 0.00643 | -1.5043396 |
| HIST1H2BC  | 214455_at   | 0.000107  | -2.0672896 | LOC100506302 | 243224_at   | 0.00643 | 1.0040452  |
| LRRK2      | 229584_at   | 0.000107  | 2.4175255  | SERPINB9     | 209722_s_at | 0.00643 | -1.5292268 |
| CDK10      | 203468_at   | 0.000108  | 1.3650479  | PAGR1        | 218300_at   | 0.00643 | 1.2657769  |
| SCD        | 200831_s_at | 0.000109  | -1.4245965 | AUTS2        | 243364_at   | 0.00643 | 1.6754127  |

|              |             |          |            |              |              |         |            |
|--------------|-------------|----------|------------|--------------|--------------|---------|------------|
| SLC1A5       | 208916_at   | 0.000109 | -1.2214431 | LOC441179    | 239665_at    | 0.00645 | 2.0728622  |
| KIAA0922     | 209760_at   | 0.000109 | -1.0245835 | SHISA9       | 1556619_at   | 0.00645 | -1.565149  |
| HAPLN1       | 230204_at   | 0.000109 | -1.5307243 | CCDC110      | 230900_at    | 0.00645 | 1.6399108  |
| SRC          | 213324_at   | 0.000109 | -1.7149821 | LOC100505564 | 238376_at    | 0.00646 | 1.0955463  |
| NT5E         | 203939_at   | 0.00011  | 2.4531659  | C1orf43      | 1555226_s_at | 0.00646 | -1.5772761 |
| LOC100288911 | 236656_s_at | 0.00011  | 1.8407795  | FGFBP3       | 238453_at    | 0.00647 | 1.2376613  |
| CACNA2D1     | 227623_at   | 0.00011  | 2.0004141  | ZNF135       | 206142_at    | 0.00647 | 2.0400816  |
| PLA2G6       | 210647_x_at | 0.000112 | 1.0064498  | CCDC30       | 221171_at    | 0.00647 | -1.0941565 |
| ANXA2P2      | 208816_x_at | 0.000112 | -1.2272709 | SPINK5       | 205185_at    | 0.00649 | -2.3669984 |
| ZNF485       | 1552427_at  | 0.000113 | 1.1037839  | LINC00908    | 1558850_s_at | 0.0065  | 1.5182511  |
| BCAP31       | 200837_at   | 0.000113 | -1.2030761 | PAX6         | 235795_at    | 0.0065  | -2.7411473 |
| MARCKS       | 201670_s_at | 0.000113 | -1.5407523 | L3MBTL1      | 206822_s_at  | 0.00652 | 1.2034641  |
| CXCL9        | 203915_at   | 0.000113 | -2.9427274 | CSRNP3       | 235355_at    | 0.00653 | 1.6919568  |
| UBE2T        | 223229_at   | 0.000114 | -1.8108854 | NRF1         | 211280_s_at  | 0.00653 | -1.1775485 |
| LOC101928291 | 232758_s_at | 0.000114 | 1.2268497  | SLC13A3      | 230687_at    | 0.00655 | -1.4582813 |
| SLC2A1       | 201249_at   | 0.000115 | -1.9923634 | AGER         | 217046_s_at  | 0.00656 | 1.2291891  |
| APLN         | 244166_at   | 0.000115 | 2.094942   | LOC101927668 | 237193_s_at  | 0.00656 | 1.5860076  |
| SGSM1        | 230287_at   | 0.000115 | 2.399607   | GUSBP1       | 235888_at    | 0.00658 | 1.2181729  |
| HFM1         | 241469_at   | 0.000115 | 2.9138792  | CMBL         | 227522_at    | 0.0066  | 1.6025035  |
| GJA9-MYCBP   | 203360_s_at | 0.000115 | -1.1983626 | FAM155A      | 230869_at    | 0.00661 | 2.2678749  |
| NAV2         | 222598_s_at | 0.000116 | -1.5825863 | ALDOA        | 214687_x_at  | 0.00661 | -1.314932  |
| ANKRD29      | 229308_at   | 0.000117 | 2.3029884  | GRPEL1       | 212432_at    | 0.00662 | -1.0167366 |
| LINC00472    | 235771_at   | 0.000117 | 1.889468   | LOC286272    | 232182_at    | 0.00662 | 1.4206869  |
| CAST         | 208908_s_at | 0.000117 | -1.207323  | RAB3IP       | 238853_at    | 0.00664 | -1.0927189 |
| PPP2CA       | 238719_at   | 0.000117 | 1.0151307  | ATP2A1-AS1   | 230696_at    | 0.00664 | -1.4980255 |
| KANSL1L      | 230561_s_at | 0.000118 | 1.1810303  | NTRK3        | 228849_at    | 0.00664 | 1.336098   |
| MTMR9LP      | 228593_at   | 0.000118 | 1.4256029  | ATAD2        | 218782_s_at  | 0.00667 | -1.4013331 |

|           |              |          |            |             |              |         |            |
|-----------|--------------|----------|------------|-------------|--------------|---------|------------|
| FAM198B   | 223204_at    | 0.000118 | 2.2471862  | SRGN        | 1554676_at   | 0.0067  | -1.4343331 |
| CNKSR2    | 229116_at    | 0.000118 | 2.7131631  | CCL18       | 32128_at     | 0.0067  | -1.907402  |
| EMILIN3   | 228307_at    | 0.000119 | 1.7230342  | HPGD        | 211549_s_at  | 0.00671 | 1.9287214  |
| ARID4B    | 214943_s_at  | 0.000119 | -1.7320829 | IL20RA      | 219115_s_at  | 0.00671 | 1.8857149  |
| FBXO11    | 219208_at    | 0.00012  | -1.3734357 | ATAD2B      | 232908_at    | 0.00672 | -1.223975  |
| HNMT      | 211732_x_at  | 0.000122 | 1.8516633  | ZNF606      | 229707_at    | 0.00672 | 1.0148404  |
| DCBLD1    | 226609_at    | 0.000122 | 1.124381   | FPGT-TNNI3K | 220415_at    | 0.00674 | 1.6389002  |
| LDB2      | 206481_s_at  | 0.000124 | 1.4446806  | MIR6787     | 202855_s_at  | 0.00677 | -1.681018  |
| MAGI2     | 207702_s_at  | 0.000125 | 2.6843335  | ELK4        | 205994_at    | 0.00677 | -1.0104597 |
| GLUL      | 242281_at    | 0.000125 | -1.2430055 | NT5DC1      | 241962_at    | 0.00678 | 1.0414992  |
| EPOR      | 209962_at    | 0.000125 | 1.9091172  | FGF9        | 239178_at    | 0.00678 | 2.4249906  |
| RBM47     | 222496_s_at  | 0.000126 | -1.2437014 | LIX1        | 230865_at    | 0.00679 | 2.680912   |
| OLA1      | 224525_s_at  | 0.000126 | 1.2093667  | SAE1        | 1555618_s_at | 0.00681 | -1.1520579 |
| PHF21B    | 1562309_s_at | 0.000127 | 2.9221322  | HPGD        | 203914_x_at  | 0.00685 | 2.5068303  |
| SLC7A6    | 203580_s_at  | 0.000127 | -1.2845893 | MTMR1       | 214975_s_at  | 0.00685 | -1.6260375 |
| AHSA2     | 212980_at    | 0.000127 | 1.6592509  | ZNF689      | 227445_at    | 0.00687 | 1.1774447  |
| NQO1      | 210519_s_at  | 0.000128 | -2.3600707 | AP1AR       | 242753_x_at  | 0.00692 | -1.5821994 |
| RBM4      | 227979_at    | 0.000128 | 1.0125141  | NSUN6       | 222128_at    | 0.00692 | 1.1355277  |
| DDIT4     | 202887_s_at  | 0.000129 | -1.9449077 | PINLYP      | 213556_at    | 0.00694 | 1.5034559  |
| SLC12A2   | 204404_at    | 0.000129 | -1.3152403 | MGC16275    | 1558166_at   | 0.00694 | 1.217462   |
| LINC00921 | 243547_at    | 0.000129 | 1.8455817  | CEACAM21    | 214907_at    | 0.00695 | 1.580738   |
| SNHG19    | 228049_x_at  | 0.00013  | 1.2316317  | FRG1KP      | 235535_x_at  | 0.00698 | 1.2032925  |
| GPM6A     | 209469_at    | 0.00013  | 3.1093783  | CXCL14      | 222484_s_at  | 0.00699 | -3.0667841 |
| EPHA4     | 228948_at    | 0.00013  | -3.0160592 | IGLJ3       | 217148_x_at  | 0.007   | -1.3049466 |
| HPN       | 204934_s_at  | 0.00013  | 1.508671   | FAM64A      | 221591_s_at  | 0.00704 | -1.2254649 |
| LINC00663 | 1555363_s_at | 0.00013  | 1.4213045  | COBLL1      | 229598_at    | 0.00704 | -1.6012161 |
| LRRC14    | 32062_at     | 0.00013  | 1.2496971  | DCN         | 240556_at    | 0.00707 | 1.3815239  |

|              |              |          |            |            |              |         |            |
|--------------|--------------|----------|------------|------------|--------------|---------|------------|
| STRIP2       | 1555292_at   | 0.000131 | -2.5316324 | CASK       | 207620_s_at  | 0.00707 | -1.3444423 |
| PPM1A        | 227728_at    | 0.000131 | 1.313768   | PCBP1-AS1  | 1562481_at   | 0.00708 | 1.2055138  |
| ARFGEF3      | 242098_at    | 0.000131 | -2.0717742 | EIF3H      | 230570_at    | 0.0071  | 1.2349107  |
| EFEMP1       | 201843_s_at  | 0.000131 | 2.586125   | GATA2      | 209710_at    | 0.0071  | 1.3517566  |
| KPNA1        | 202059_s_at  | 0.000132 | -1.2067613 | PAXBP1-AS1 | 239407_at    | 0.00713 | 1.3477739  |
| LOC102724156 | 230991_at    | 0.000132 | 1.5745536  | PSAT1      | 223062_s_at  | 0.00714 | -1.315212  |
| TK1          | 1554408_a_at | 0.000132 | -1.3379992 | AMDHD1     | 229596_at    | 0.00714 | 1.6668983  |
| MS4A4A       | 219607_s_at  | 0.000133 | -2.0625612 | MYO15B     | 227743_at    | 0.00715 | 1.0967488  |
| RAD51-AS1    | 1560081_at   | 0.000133 | 1.2010938  | RGL3       | 1556355_x_at | 0.00716 | 1.1094348  |
| CCBE1        | 242324_x_at  | 0.000133 | 2.1374223  | GNAQ       | 211426_x_at  | 0.00716 | -1.0822827 |
| MIB2         | 226644_at    | 0.000133 | 1.3358496  | ABCA1      | 216066_at    | 0.00716 | -1.5418041 |
| DEGS1        | 207431_s_at  | 0.000134 | -1.3381686 | TMED5      | 202195_s_at  | 0.00719 | -1.0152255 |
| FSD1L        | 223985_at    | 0.000135 | -2.3100231 | RSF1       | 223818_s_at  | 0.00722 | -1.1719703 |
| EIF3A        | 200596_s_at  | 0.000136 | -1.0001421 | RPS27A     | 200017_at    | 0.00723 | 1.0902964  |
| LOC101060604 | 1555216_a_at | 0.000136 | 1.9595171  | LRP5L      | 214873_at    | 0.00723 | 1.020773   |
| RBFOX3       | 235468_at    | 0.000136 | 2.200567   | LOC158434  | 1563827_at   | 0.00725 | 2.1818853  |
| CD82         | 203904_x_at  | 0.000137 | -2.0123418 | LACTB      | 1552486_s_at | 0.00726 | -1.1104467 |
| CEBPG        | 204203_at    | 0.000138 | -1.2789355 | MIATNB     | 232340_at    | 0.00726 | 1.0852414  |
| PYGB         | 201481_s_at  | 0.000139 | -1.7738815 | FOXA2      | 210103_s_at  | 0.00727 | 2.0791126  |
| RARRES2      | 209496_at    | 0.00014  | 2.3275842  | CLDN1      | 218182_s_at  | 0.00729 | -1.6352285 |
| OAZ3         | 222075_s_at  | 0.00014  | -1.8369832 | MIB2       | 241541_at    | 0.00729 | 1.1126796  |
| FANCA        | 203805_s_at  | 0.00014  | -1.4882161 | PDGFC      | 222719_s_at  | 0.00729 | -1.5673391 |
| BEND7        | 227341_at    | 0.00014  | 2.4865204  | ITPR1-AS1  | 239764_at    | 0.00732 | 1.3959904  |
| WDR86        | 243526_at    | 0.000141 | 2.4003777  | RHEBL1     | 1570253_a_at | 0.00733 | -1.2335996 |
| GLT8D2       | 221447_s_at  | 0.000141 | 1.4932043  | CSAD       | 221139_s_at  | 0.00734 | 1.1123793  |
| EFEMP1       | 201842_s_at  | 0.000142 | 2.3804313  | TMPO       | 209754_s_at  | 0.00734 | -1.3607181 |
| ABCA17P      | 231164_at    | 0.000142 | 2.419169   | ST6GALNAC5 | 230482_at    | 0.00736 | -1.6704886 |

|              |             |          |            |              |              |         |            |
|--------------|-------------|----------|------------|--------------|--------------|---------|------------|
| TCEAL1       | 204045_at   | 0.000144 | 1.1756624  | NT5M         | 219708_at    | 0.00737 | 1.5158605  |
| FGF14-AS2    | 230351_at   | 0.000144 | 2.0908846  | DMBX1        | 234776_at    | 0.00738 | -1.8317231 |
| MIR6883      | 36829_at    | 0.000145 | 1.0011874  | GALM         | 235256_s_at  | 0.0074  | -1.0364537 |
| SIX1         | 228347_at   | 0.000145 | -3.2799825 | NXPE3        | 243606_at    | 0.0074  | 1.0811916  |
| COX10-AS1    | 1557192_at  | 0.000146 | 1.1109196  | LOC101929713 | 1560373_a_at | 0.00742 | 1.3880009  |
| ZNF599       | 228093_at   | 0.000146 | 1.08725    | ZSCAN16-AS1  | 1557062_at   | 0.00742 | 1.2282519  |
| CCHCR1       | 42361_g_at  | 0.000146 | 1.2142645  | CDCA7        | 230060_at    | 0.00742 | 1.2631715  |
| ENO1-AS1     | 237028_at   | 0.000146 | 1.605782   | PLEKHF2      | 222699_s_at  | 0.00742 | -1.1516398 |
| MBIP         | 218411_s_at | 0.000147 | 1.1244049  | HMGCR        | 202539_s_at  | 0.00744 | -1.2002195 |
| UBE2H        | 217799_x_at | 0.000147 | -1.609752  | ABCC8        | 210246_s_at  | 0.00745 | 1.7491897  |
| SMARCA4      | 208793_x_at | 0.000147 | -1.6597495 | FKBP7        | 231130_at    | 0.00746 | 1.1542892  |
| TANK         | 210458_s_at | 0.000148 | -1.2368101 | GNAS-AS1     | 232881_at    | 0.00746 | 1.8099768  |
| UHMK1        | 235003_at   | 0.000148 | -1.542871  | ZNF300       | 228144_at    | 0.00747 | 2.0366127  |
| MTAP         | 216685_s_at | 0.000148 | -1.682274  | KCNT2        | 244455_at    | 0.00748 | 1.8518493  |
| DYX1C1-CCPG1 | 214152_at   | 0.000148 | 1.0189746  | CPLX1        | 223500_at    | 0.00748 | 1.1143908  |
| CPEB3        | 239765_at   | 0.000149 | 1.2816121  | GLT1D1       | 229770_at    | 0.00748 | 1.4525878  |
| TTC5         | 243007_at   | 0.00015  | 1.0340317  | TNFAIP6      | 206025_s_at  | 0.0075  | -1.4497943 |
| CCNA2        | 203418_at   | 0.00015  | -1.7330107 | TPK1         | 223686_at    | 0.00752 | -1.6001779 |
| ZNF780B      | 242969_at   | 0.00015  | 1.0222329  | MYO3B        | 1555257_a_at | 0.00752 | -1.6151398 |
| LOC100506718 | 204358_s_at | 0.00015  | 1.3221675  | SAA3P        | 222226_at    | 0.00752 | -1.163155  |
| NFYC         | 211797_s_at | 0.00015  | -1.814768  | MYO1B        | 212364_at    | 0.00756 | -1.0317181 |
| MFI2-AS1     | 239521_at   | 0.000151 | 1.7802749  | CMAHP        | 229604_at    | 0.00758 | 1.4971605  |
| KLF2         | 219371_s_at | 0.000151 | 1.3889779  | ANGPT1       | 205609_at    | 0.00759 | 1.4206028  |
| PPP1R14C     | 226907_at   | 0.000152 | -2.5404601 | AVPR1A       | 238835_at    | 0.00763 | 1.9039103  |
| SMARCA2      | 217707_x_at | 0.000154 | 1.1584361  | TROVE2       | 207520_at    | 0.00764 | -1.0253626 |
| LOC105371352 | 237015_at   | 0.000154 | 2.2904137  | C1orf64      | 229381_at    | 0.00766 | 1.5691837  |
| SLC24A3      | 219090_at   | 0.000154 | 2.7018909  | EGLN1        | 224314_s_at  | 0.00767 | -1.3264595 |

|              |              |          |            |              |              |         |            |
|--------------|--------------|----------|------------|--------------|--------------|---------|------------|
| ANGPTL1      | 224339_s_at  | 0.000155 | 2.7699277  | CALD1        | 235834_at    | 0.00768 | 1.1425981  |
| FAM162B      | 228875_at    | 0.000155 | 1.5314413  | CENPV        | 226610_at    | 0.00771 | 2.2537528  |
| LOC101927365 | 238069_at    | 0.000156 | 1.0704552  | SOCS6        | 214462_at    | 0.00776 | -1.1462038 |
| UBE2I        | 208760_at    | 0.000157 | 1.0471131  | LOC100507855 | 204348_s_at  | 0.00777 | -1.2790487 |
| PAPPA        | 224940_s_at  | 0.000157 | 2.086362   | TSHZ1        | 223282_at    | 0.00778 | 1.0701609  |
| MUM1         | 229033_s_at  | 0.000157 | 1.6031012  | SLC16A1      | 209900_s_at  | 0.00779 | 1.5136629  |
| SREK1        | 238781_at    | 0.000158 | 1.068814   | MYNN         | 237510_at    | 0.00782 | 1.0429164  |
| TMEM132A     | 218834_s_at  | 0.000158 | -1.0902141 | CD28         | 206545_at    | 0.00784 | -1.2545261 |
| SREK1        | 235611_at    | 0.000158 | 1.2539589  | TRIM66       | 237679_at    | 0.00792 | -1.1280432 |
| TGFBR3       | 204731_at    | 0.000158 | 1.6700824  | TDRP         | 230903_s_at  | 0.00793 | 1.6849116  |
| ARL10        | 228843_at    | 0.00016  | 1.5777999  | LOC100129098 | 1569361_a_at | 0.00794 | 1.1948287  |
| PEX13        | 205246_at    | 0.00016  | -1.706525  | LMO7DN       | 239553_at    | 0.00796 | 1.5716894  |
| HMGB3        | 225601_at    | 0.00016  | -1.4728652 | PAIP2B       | 221868_at    | 0.00796 | 1.0672234  |
| MUM1         | 223347_at    | 0.00016  | 1.1021038  | LOC101930370 | 1562053_at   | 0.00796 | 1.5022489  |
| G3BP2        | 208840_s_at  | 0.00016  | -1.2736549 | NLGN1        | 205893_at    | 0.00797 | 1.7216195  |
| DHTKD1       | 209916_at    | 0.000162 | -1.0461144 | DMD          | 203881_s_at  | 0.008   | 1.3486662  |
| VEGFA        | 210513_s_at  | 0.000162 | -1.4599507 | SPON1        | 213993_at    | 0.008   | 2.8323435  |
| VDR          | 204254_s_at  | 0.000162 | -1.825056  | CLIP1        | 1558924_s_at | 0.00801 | -1.6439846 |
| LENG8        | 224673_at    | 0.000164 | 1.0731794  | MEDAG        | 227058_at    | 0.00803 | -1.1165611 |
| ZNF709       | 1553247_a_at | 0.000164 | 1.3486312  | COBL         | 213050_at    | 0.00805 | 1.2774115  |
| TBC1D16      | 228488_at    | 0.000164 | -1.088348  | SETD2        | 220946_s_at  | 0.00806 | -1.0684988 |
| SSBP2        | 1558604_a_at | 0.000165 | 1.5641156  | HIST3H3      | 208572_at    | 0.00808 | 1.4780031  |
| NR4A2        | 204622_x_at  | 0.000165 | 1.7813902  | COL5A1       | 203325_s_at  | 0.00808 | 1.2675879  |
| CCT5         | 208696_at    | 0.000165 | -1.6039065 | GAMT         | 205354_at    | 0.00809 | 1.604962   |
| CCDC88C      | 227228_s_at  | 0.000167 | -1.2336666 | PRR5L        | 219383_at    | 0.00811 | -1.1809588 |
| GABBR1       | 238569_at    | 0.000168 | 1.586793   | SNORA11E     | 223313_s_at  | 0.00812 | 1.9466486  |
| RC3H2        | 220202_s_at  | 0.000168 | -1.0277651 | ZMYM2        | 241800_x_at  | 0.00812 | -1.1535008 |

|              |              |          |            |              |              |         |            |
|--------------|--------------|----------|------------|--------------|--------------|---------|------------|
| NAV3         | 204823_at    | 0.000169 | 2.9428641  | ATL2         | 237968_at    | 0.00812 | -1.5748357 |
| GABRB3       | 229724_at    | 0.00017  | 2.1356185  | NPRL2        | 210373_at    | 0.00812 | 1.2602504  |
| IQGAP3       | 229538_s_at  | 0.00017  | -1.9002112 | HOXC8        | 221350_at    | 0.00814 | -1.3357107 |
| LOC101926913 | 215627_at    | 0.00017  | 1.7648432  | ADAMTSL3     | 213974_at    | 0.00814 | 1.3851447  |
| DCUN1D5      | 239425_at    | 0.00017  | 1.488651   | GNPDA2       | 227022_at    | 0.00818 | 1.001007   |
| MIR6883      | 202861_at    | 0.000171 | 1.6582339  | CR1L         | 239205_s_at  | 0.00819 | -1.0422879 |
| TTL          | 224908_s_at  | 0.000171 | -1.2458801 | PHF1         | 202928_s_at  | 0.00819 | 1.1166225  |
| PPID         | 228469_at    | 0.000171 | 1.136452   | ASAP3        | 219103_at    | 0.00819 | 1.1033008  |
| ALDH6A1      | 221589_s_at  | 0.000172 | 1.371179   | SPATA6L      | 237363_at    | 0.0082  | 1.6080329  |
| ENO2         | 201313_at    | 0.000172 | -1.7755999 | FRA10AC1     | 244767_at    | 0.0082  | 1.1267994  |
| KCNJ15       | 210119_at    | 0.000174 | -2.9816856 | CTSZ         | 210042_s_at  | 0.00821 | -1.2185271 |
| AIFM1        | 205512_s_at  | 0.000174 | -1.4169744 | OBSCN        | 216085_at    | 0.00822 | 1.3288484  |
| IDNK         | 239086_at    | 0.000177 | 1.2071677  | PRRX1        | 226695_at    | 0.00824 | 1.6118026  |
| ATP1A2       | 203296_s_at  | 0.000178 | 3.1359676  | FIGN         | 242828_at    | 0.00825 | -1.4597792 |
| GAS7         | 202192_s_at  | 0.000178 | 1.1488134  | CHAF1A       | 203976_s_at  | 0.00825 | -1.3707858 |
| LOC283177    | 1557207_s_at | 0.000178 | 1.9888734  | COX2         | 1553570_x_at | 0.00825 | -1.0016006 |
| ARRDC4       | 225283_at    | 0.000178 | 1.4515193  | PAICS        | 201014_s_at  | 0.00831 | -1.0780413 |
| SYNCRIP      | 209025_s_at  | 0.000178 | -1.1216211 | BCL2         | 203684_s_at  | 0.00833 | 1.5985663  |
| HLF          | 204753_s_at  | 0.000178 | 2.503838   | SEMA3E       | 206941_x_at  | 0.00833 | 2.5599832  |
| GNL3L        | 205010_at    | 0.000178 | -1.0369929 | CH17-408M7.1 | 1556235_at   | 0.00836 | 1.6470243  |
| LOC101927752 | 227092_at    | 0.000179 | 1.6393314  | ARPC4-TTLL3  | 210129_s_at  | 0.00837 | 1.301662   |
| IGF2BP3      | 203819_s_at  | 0.000181 | -3.0647852 | FLNB         | 208613_s_at  | 0.00839 | -1.0267008 |
| HCG4         | 206685_at    | 0.000182 | 2.4758143  | ITGBL1       | 214927_at    | 0.0084  | 1.7661861  |
| OAS3         | 218400_at    | 0.000183 | -2.0119399 | PGK1         | 200737_at    | 0.00841 | -1.4077952 |
| RGS7         | 206290_s_at  | 0.000183 | 2.729509   | FAM86B3P     | 234049_at    | 0.00841 | 1.7420882  |
| NCF2         | 209949_at    | 0.000183 | -1.5743681 | LOC728613    | 229283_at    | 0.00841 | 1.0161267  |
| C8orf88      | 1557961_s_at | 0.000183 | 2.3053354  | CPAMD8       | 227721_at    | 0.00842 | 1.0610946  |

|             |              |          |            |                     |             |         |            |
|-------------|--------------|----------|------------|---------------------|-------------|---------|------------|
| SAR1A       | 210790_s_at  | 0.000183 | -1.5189881 | GLIPR1              | 226142_at   | 0.00843 | 1.0892025  |
| ADAMTS9-AS2 | 1562295_at   | 0.000185 | 2.0652816  | RMI2                | 226456_at   | 0.00845 | -1.1647647 |
| UGGT1       | 222569_at    | 0.000185 | -1.0331263 | FBLN1               | 202994_s_at | 0.00845 | 1.9592943  |
| SMARCC1     | 201075_s_at  | 0.000185 | -1.0080214 | CUX2                | 1566528_at  | 0.00847 | 1.7971828  |
| LSM5        | 202903_at    | 0.000187 | 1.1275121  | ZBTB20              | 213158_at   | 0.00848 | 1.0117427  |
| CPQ         | 203501_at    | 0.000188 | 1.5288342  | PDE7B               | 230109_at   | 0.00851 | 1.0572456  |
| RAD51       | 205024_s_at  | 0.000189 | -1.4324842 | ZNF385B             | 229019_at   | 0.00852 | 2.4697348  |
| PRKAG2-AS1  | 229156_s_at  | 0.000189 | 2.3282549  | PDK3                | 230085_at   | 0.00852 | -1.2787673 |
| PGM5        | 226303_at    | 0.00019  | 2.1073155  | PTPRG               | 227126_at   | 0.00854 | 1.0443873  |
| XRN1        | 1555785_a_at | 0.00019  | -1.2834424 | PPP2R2B             | 213849_s_at | 0.00856 | 1.0380378  |
| ID4         | 209293_x_at  | 0.00019  | 1.4618801  | ACACB               | 49452_at    | 0.00858 | 1.1537556  |
| ZBTB47      | 226500_at    | 0.00019  | 1.1917839  | ZNF826P             | 1569191_at  | 0.00859 | 1.713585   |
| IL4R        | 203233_at    | 0.00019  | -1.1198051 | OBSL1               | 227573_s_at | 0.00861 | 1.4375444  |
| SYTL3       | 238423_at    | 0.00019  | -1.2272647 | TGFBRAP1            | 225653_at   | 0.00861 | -1.0906879 |
| ACTR2       | 200729_s_at  | 0.00019  | -1.0882002 | SPTLC2              | 216202_s_at | 0.00863 | -1.3646196 |
| GLYCTK-AS1  | 242692_at    | 0.000191 | 1.6171634  | HNMT                | 204111_at   | 0.00864 | 1.4899679  |
| GTSE1       | 215942_s_at  | 0.000192 | -1.3620131 | SAMD3               | 236782_at   | 0.00866 | 1.0550018  |
| CA2         | 209301_at    | 0.000192 | -2.3438932 | CCBE1               | 243805_at   | 0.00866 | 1.8785459  |
| ATP8A1      | 213106_at    | 0.000193 | 1.3023809  | TMCO3               | 220241_at   | 0.00866 | -1.1794082 |
| XYLT1       | 213725_x_at  | 0.000193 | 1.7443498  | CR1L                | 239206_at   | 0.00866 | -1.8002508 |
| RDH10       | 227467_at    | 0.000194 | -1.8822845 | LOC101928424        | 239241_at   | 0.0087  | 1.122347   |
| CTSC        | 225646_at    | 0.000194 | -1.2651087 | WT1                 | 206067_s_at | 0.00871 | 2.1178057  |
| CLEC11A     | 211709_s_at  | 0.000195 | 1.2371998  | CYP2A7P1            | 216340_s_at | 0.00872 | -1.304998  |
| RDH10       | 226021_at    | 0.000197 | -1.7577685 | PHLDA1              | 225842_at   | 0.00872 | -1.5343285 |
| TRPM3       | 239291_at    | 0.000198 | 2.742534   | ZNF114              | 1552946_at  | 0.00872 | 1.6527075  |
| SGTB        | 228745_at    | 0.000199 | 1.1137847  | PHOSPHO2-<br>KLHL23 | 237756_at   | 0.00872 | 1.3545332  |

|              |              |          |            |           |              |         |            |
|--------------|--------------|----------|------------|-----------|--------------|---------|------------|
| CACNA1G      | 210380_s_at  | 0.0002   | 1.8037255  | GPR83     | 222953_at    | 0.00877 | -2.0425233 |
| PCMT1        | 210156_s_at  | 0.0002   | -1.1404712 | GATAD2B   | 238076_at    | 0.00878 | 1.0098923  |
| CDC14A       | 205288_at    | 0.0002   | 1.2136173  | LRCH3     | 240926_at    | 0.0088  | -1.0609797 |
| THAP6        | 230169_at    | 0.0002   | 1.1513303  | RIMS3     | 210991_s_at  | 0.00887 | -1.3270339 |
| DPH7         | 225586_at    | 0.0002   | 1.1404184  | GAREM1    | 237262_at    | 0.00888 | -1.0633556 |
| MFI2-AS1     | 243629_x_at  | 0.0002   | 1.4538247  | NFATC2    | 226991_at    | 0.00889 | -1.2771671 |
| NSUN5P2      | 213460_x_at  | 0.0002   | 1.2279302  | TDRD6     | 232692_at    | 0.00889 | 1.3966766  |
| FBRS         | 238771_at    | 0.000201 | 1.4038962  | HSD17B11  | 217989_at    | 0.0089  | 1.0376908  |
| EPHX2        | 209368_at    | 0.000203 | 2.0054528  | PLEKHA6   | 205093_at    | 0.00894 | -1.7034409 |
| MAGI2-AS3    | 229480_at    | 0.000203 | 1.9947533  | CCNE2     | 211814_s_at  | 0.00894 | -1.325014  |
| GALK2        | 205219_s_at  | 0.000203 | -1.430814  | NSUN7     | 238983_at    | 0.00895 | 1.2280393  |
| SLITRK6      | 232176_at    | 0.000203 | 2.7180709  | HSD17B12  | 1559518_at   | 0.00897 | 1.0026351  |
| ZSCAN18      | 217593_at    | 0.000204 | 1.6424713  | ACKR3     | 1559114_a_at | 0.00898 | 1.6604662  |
| TOLLIP-AS1   | 1555865_at   | 0.000204 | 1.1525987  | PLA2G4B   | 219095_at    | 0.00899 | 1.0877816  |
| SGPP2        | 226560_at    | 0.000204 | -1.3946766 | STON2     | 242583_at    | 0.009   | -1.2176023 |
| RUSC2        | 213066_at    | 0.000205 | 1.6937336  | HBB       | 211696_x_at  | 0.00902 | 1.3434605  |
| RNF146       | 221430_s_at  | 0.000205 | -1.1866747 | MASP1     | 235770_at    | 0.00907 | 1.2282002  |
| ACP1         | 201629_s_at  | 0.000205 | -2.5045589 | TC2N      | 1553132_a_at | 0.00907 | -1.2921008 |
| COL6A1       | 212091_s_at  | 0.000205 | 2.4805204  | EXOC3     | 228847_at    | 0.00908 | 1.1296351  |
| EEF2KMT      | 222013_x_at  | 0.000205 | 1.355866   | PGAP1     | 220576_at    | 0.00909 | 1.5918746  |
| LOC100272217 | 243784_s_at  | 0.000206 | 1.6335635  | ZNF442    | 208081_s_at  | 0.00909 | 1.1904897  |
| ITGB1        | 1553530_a_at | 0.000206 | -2.0348862 | SLC22A3   | 205421_at    | 0.0091  | 2.1538641  |
| TMEM120B     | 219154_at    | 0.000206 | 1.4587105  | RBPM5-AS1 | 240929_at    | 0.00914 | 1.0866538  |
| ARHGEF28     | 1554003_at   | 0.000207 | 1.6286813  | FOXP2     | 243278_at    | 0.00914 | 2.3239992  |
| PRDM11       | 229687_s_at  | 0.00021  | 1.3222789  | F2R       | 203989_x_at  | 0.00914 | -1.0083722 |
| WDR20        | 227541_at    | 0.00021  | -1.0018538 | BHLHA15   | 235965_at    | 0.00914 | -1.2089831 |
| LOC202025    | 236079_at    | 0.00021  | 1.5308485  | PLEKHM1   | 216200_at    | 0.00919 | -1.4515225 |

|          |              |          |            |            |              |         |            |
|----------|--------------|----------|------------|------------|--------------|---------|------------|
| CLASP2   | 1555469_a_at | 0.000211 | -1.9269151 | S100A10    | 200872_at    | 0.00919 | -1.2297072 |
| SUDS3    | 233841_s_at  | 0.000211 | -1.108205  | GMDS-AS1   | 232335_at    | 0.00919 | 1.1469779  |
| MAGEL2   | 219894_at    | 0.000212 | 2.5097173  | YIF1B      | 231211_s_at  | 0.00921 | 1.5979666  |
| RMND5A   | 212479_s_at  | 0.000212 | -1.2375173 | RAPH1      | 225189_s_at  | 0.00923 | -1.015441  |
| SOD3     | 205236_x_at  | 0.000212 | 1.3886477  | TMEM37     | 1554485_s_at | 0.00925 | -2.161207  |
| KCNJ2    | 206765_at    | 0.000212 | -1.9393293 | ZFAND4     | 244206_at    | 0.00925 | -1.5634915 |
| COL27A1  | 225292_at    | 0.000213 | 1.4166745  | MAP1B      | 212233_at    | 0.00926 | -1.3000736 |
| UNKL     | 229908_s_at  | 0.000213 | 1.0054936  | CDH3       | 203256_at    | 0.00929 | -1.4898197 |
| YBX1     | 208628_s_at  | 0.000214 | -1.1600666 | PRPF31     | 202407_s_at  | 0.00931 | -1.7844319 |
| WIPF1    | 202665_s_at  | 0.000214 | -1.0104968 | AICDA      | 219841_at    | 0.00935 | -1.5759388 |
| GK5      | 241384_x_at  | 0.000217 | 1.3478608  | TUSC2      | 203272_s_at  | 0.00935 | -1.2717404 |
| MRPL42   | 217919_s_at  | 0.000218 | -1.1367658 | EIF2S3     | 205321_at    | 0.00938 | -1.1316446 |
| RGS5     | 209071_s_at  | 0.00022  | -1.7703969 | GATA6      | 210002_at    | 0.00942 | 1.7522814  |
| ADAMDEC1 | 206134_at    | 0.00022  | -2.0937188 | MYO6       | 203215_s_at  | 0.00942 | -1.0025296 |
| ETV7     | 221680_s_at  | 0.00022  | -1.5284014 | ZNF667-AS1 | 244741_s_at  | 0.00948 | 1.6376559  |
| SH3GLB1  | 209091_s_at  | 0.00022  | -1.2035705 | TRIP11     | 235973_at    | 0.00948 | 1.4708356  |
| ETAA1    | 219216_at    | 0.00022  | 1.0185227  | TRAF3IP2   | 215411_s_at  | 0.0095  | 1.290254   |
| CCDC6    | 225010_at    | 0.000221 | -1.2364975 | MPDU1      | 209208_at    | 0.0095  | -1.5561363 |
| PAPPA    | 201981_at    | 0.000222 | 1.8650164  | AKAP12     | 231067_s_at  | 0.0095  | 2.1873413  |
| DDX19A   | 202578_s_at  | 0.000222 | -1.1418582 | ZNF853     | 232884_s_at  | 0.00951 | 1.090604   |
| CD44     | 212014_x_at  | 0.000223 | -1.3963221 | GNAL       | 213924_at    | 0.00952 | 1.4739581  |
| ROCK2    | 202762_at    | 0.000223 | -1.0143534 | LMO4       | 229537_at    | 0.00955 | 1.2297105  |
| PGK1     | 217356_s_at  | 0.000224 | -2.2740191 | DOK3       | 223553_s_at  | 0.00957 | -1.0565249 |
| NEBL-AS1 | 239894_at    | 0.000224 | 2.0348841  | RBM33      | 1554096_a_at | 0.00957 | -1.3834564 |
| ZNF502   | 229532_at    | 0.000224 | 1.4597906  | SATB1      | 203408_s_at  | 0.00958 | 1.769446   |
| BLCAP    | 201032_at    | 0.000224 | -1.0356325 | FAM229A    | 1556560_a_at | 0.00958 | 1.1304127  |
| YWHAZ    | 200638_s_at  | 0.000224 | -1.6346675 | NEDD1      | 1552417_a_at | 0.00961 | -1.7522975 |

|           |              |          |            |              |              |         |            |
|-----------|--------------|----------|------------|--------------|--------------|---------|------------|
| HAPLN1    | 205523_at    | 0.000225 | -2.4545043 | MGC10814     | 224134_at    | 0.00962 | -1.2154782 |
| TTN       | 242771_at    | 0.000225 | 2.1093569  | ZBTB46       | 227358_at    | 0.00963 | 1.3490784  |
| CA3       | 204865_at    | 0.000226 | 2.1558567  | SMURF1       | 212668_at    | 0.00968 | -1.2594849 |
| DNM3OS    | 232090_at    | 0.000226 | 1.8983137  | CLN6         | 1567080_s_at | 0.00969 | -1.2434602 |
| GSTM2     | 204418_x_at  | 0.000226 | 1.3361887  | DBT          | 211196_at    | 0.00971 | -1.3782813 |
| PRR5L     | 1555486_a_at | 0.000226 | -1.3002877 | LOC105377832 | 1556147_at   | 0.00972 | 1.3186805  |
| FUBP1     | 214094_at    | 0.000226 | 1.7295563  | PKMYT1       | 204267_x_at  | 0.00973 | -1.0360148 |
| TSHZ3     | 223392_s_at  | 0.000227 | 1.3818532  | LILRA5       | 1555634_a_at | 0.00973 | -1.0474653 |
| TCEA3     | 226388_at    | 0.000227 | 2.3182827  | SCAND2P      | 230612_at    | 0.00975 | 1.1546841  |
| HNRNPC    | 200751_s_at  | 0.000227 | -1.1941713 | LOC101927272 | 232384_s_at  | 0.00976 | 1.6034066  |
| RAD23B    | 201222_s_at  | 0.000227 | -1.3021817 | LOC101928797 | 1570206_at   | 0.00977 | 1.9113092  |
| PIF1      | 228252_at    | 0.00023  | -1.5801615 | CDHR5        | 220075_s_at  | 0.00979 | 1.0626402  |
| NR1D1     | 204760_s_at  | 0.00023  | 1.554972   | HS2ST1       | 230465_at    | 0.00981 | -1.2439863 |
| GABRB3    | 227690_at    | 0.000231 | 2.3315254  | TMEM47       | 209656_s_at  | 0.00982 | 1.3328022  |
| AVPR1A    | 242680_at    | 0.000232 | 2.1718051  | ZFP36L2      | 227681_at    | 0.00983 | 1.3481743  |
| CEP68     | 239442_at    | 0.000232 | 1.3997518  | PHYHD1       | 226846_at    | 0.00983 | 1.225267   |
| GAPDH     | 213453_x_at  | 0.000232 | -1.5162296 | CYAT1        | 215121_x_at  | 0.00983 | -2.3768071 |
| ASF1B     | 218115_at    | 0.000233 | -1.1537001 | DAPP1        | 222859_s_at  | 0.00985 | -1.2438896 |
| SLC7A5    | 201195_s_at  | 0.000233 | -1.4969876 | SAPCD2       | 225777_at    | 0.00986 | -1.0646929 |
| WARS      | 200629_at    | 0.000234 | -1.2143228 | COBLL1       | 211032_at    | 0.00986 | -1.9755655 |
| APLP2     | 214875_x_at  | 0.000235 | -1.7075642 | INPP5F       | 230363_s_at  | 0.00988 | -1.1558415 |
| TYMP      | 204858_s_at  | 0.000235 | -1.1970911 | HABP4        | 209819_at    | 0.0099  | 1.3155864  |
| LOC283588 | 1557113_at   | 0.000237 | 1.6511492  | LOC728705    | 230579_at    | 0.00993 | 1.131173   |
| GFPT1     | 202722_s_at  | 0.000238 | -1.084938  | ANKH         | 220076_at    | 0.00994 | 1.2782472  |
| TBRG1     | 226318_at    | 0.000238 | 1.0886437  | ADAMTS17     | 1552727_s_at | 0.00998 | 1.3872718  |
| MON2      | 212755_at    | 0.000238 | 1.2800817  | SCARA5       | 229839_at    | 0.00998 | 1.6151124  |
| MOB1A     | 201299_s_at  | 0.000238 | -1.4588487 | PRSS12       | 213802_at    | 0.00998 | 2.0260279  |

|       |             |          |           |
|-------|-------------|----------|-----------|
| MSX2  | 205555_s_at | 0.000239 | 2.8952697 |
| UCKL1 | 218533_s_at | 0.000239 | 1.1842752 |
| FEN1  | 204768_s_at | 0.000239 | -1.004431 |

---

|        |             |         |            |
|--------|-------------|---------|------------|
| TFDP1  | 204147_s_at | 0.00998 | -1.1361632 |
| RBFADN | 1558628_at  | 0.00999 | 1.5800599  |

---
